# Supplementary material
Source: publisher figshare collection journal article supplement (https://tandf.figshare.com/ndownloader/files/15593318)
Supplement: Supplementary file 1 [file 15593318]

**Supporting Information**

**Triethylammonium Thiolate as an Efficient Reagentfor Synthesis of Quinoxaline Containing Indandione Substitution *via* Sequential One-pot Multicomponent Reaction**

Abdolali Alizadeh*a, Hossein Ghasemzadeh

*aDepartment of Chemistry, Tarbiat Modares University, P.O. Box 14115-175, Tehran, Iran*

*bCollege of Chemistry and Materials Engineering, Wenzhou University, Wenzhou 325035, Zhejiang Province，P. R. China*

[*aalizadeh@modares.ac.ir*](mailto:aalizadeh@modares.ac.ir)

| Title, author’s name, address and Table of contents | S1 |
| --- | --- |
| Experimental Section  General remarks | S2 |
| General procedure for the preparation of compounds **2a** | S2 |
| Characteristic data for compounds **2a** | S2-S3 |
| General preparation procedure for compound **5a** | S3 |
| Characteristic data for compounds **5a-f** | S3-S10 |
| Ortep diagram of Compound **5a** | S4 |
| Characteristic data for compounds **6** | S10 |
| Characteristic data for compounds **7** | S11 |
| Characteristic data for compound **I** | S11-S12 |
| 1H and 13C NMR spectra of **2a** | S13-S15 |
| 1H, 13C NMR and Mass spectra of **5a-f** | S16-S41 |
| 1H, 13C NMR and Mass spectra of **6** | S42-S46 |
| 1H and Mass spectra of **7** | S47-S48 |
| 1H and 13C NMR spectra of **I** | S49-S52 |

**Experimental Section**

**General remarks:**

All reagents and solvents were of commercial quality and used without further purification. Elemental analyses for C, H and N were performed using a Heraeus CHN–O–Rapid analyzer. Mass spectra were recorded on an Aglient Technologies 5975C VL MSD mass spectrometer operating at an ionization potential of 70 eV. Nuclear magnetic resonance spectra (1H, 13C) were recorded on 500 MHz NMR spectrometers. IR spectra were recorded as KBr pellets on a NICOLET FT-IR 100 spectrometer; absorbencies are reported in cm-1.

**General procedure for the preparation of compound 2a**

The triethylamine (1.2 mmol) was added dropwise to a mixture of ninhydrin (1 mmol) and phenacyl thiocyanate (1 mmol) in absolute ethanol. The reaction mixture was stirred at room temperature by a magnetic stirrer for 10 hours. The reaction was monitored by TLC and after completion of the reaction, the precipitate was filtered and washed completely with cold *n*-hexane to obtain pure product **2a**.

**Triethylammonium 1-(1,3-dioxo-1,3-dihydro-2*H*-inden-2-ylidene)-2-oxo-2-phenylethane-1-thiolate (2a).**

Orange powder, m.p. = 170-172 °C, 0.28 g, yield: 70%. IR (KBr) (νmax, cm-1): 3316 (NH), 1646 (C=O), 1586 and 1467 (Ar), 1013 (C-S). Anal. Calcd. for C23H25NO3S (395.52): C, 69.85; H, 6.37; N, 3.54%. Found: C, 69.70; H, 6.39; N, 3.60%. 1H NMR (500 MHz, CDCl3) *δ*H 1.12 (9H, t, 3*J*HH = 7.1 Hz, CH3), 3.07 (6H, q, 3*J*HH = 7.1 Hz, CH2-N), 7.39 (2H, t, 3*J*HH = 7.5 Hz, 2CH*meta* of Ph), 7.44-7.48 (2H, m, CH of Ar), 7.57-7.62 (3H, m, CH of Ar), 7.78 (2H, d, 3*J*HH = 7.5 Hz, CH*ortho* of Ph), 8.80 (1H, s, NH). 13C NMR (125 MHz, CDCl3): *δ*C 9.1 (CH3), 46.3 (*CH2*-N), 121.0 (CH4), 121.2 (CH7), 123.8 (C2), 128.4 (2CH*meta* of Ph), 129.4 (2CH*ortho* of Ph), 132.0 (CH*para* of Ph), 133.3 (CH5), 133.3 (CH6), 136.5 (C3a), 137.9 (C7a), 141.8 (*Cipso* of Ph), 188.0 (C3), 189.0 (C1), 192.2 (*C*-S), 203.2 (Ph-*C=O*).

**General preparation procedure for compound 5a**

At first, methyl iodide (1.2 mmol) was added dropwise to a mixture of triethylammonium thiolate salt (1 mmol) in ethanol (3 ml). The resulting mixture was stirred at room temperature for 4 hours. Then, phenylenediamine (1 mmol) was added and the reaction mixture was allowed to stir at room temperature for 3 hours. After completion of the reaction (checked by TLC), the precipitate was filtered and completely washed with cold ethanol (5 ml).

**3-Hydroxy-2-(3-phenylquinoxalin-2-yl)-1*H*-inden-1-one (5a)**.

Orange powder, m.p. = 260-262 °C, 0.34 g, yield: 96%. IR (KBr) (νmax, cm-1): 3420 (OH), 1685 (C=O), 1621 (C=N), 1572 and 1503 (Ar). Anal. Calcd. for C23H14N2O2 (350.38): C, 78.84; H, 4.03; N, 8.00 %. Found: C, 78.80; H, 4.13; N, 8.10 %. MS (EI, 70 eV) *m/z* (%): 351 (M+1, 32), 350 (M+, 100), 349 (48), 333 (28), 322 (21), 321 (53), 306 (34), 305 (76), 321 (53), 293 (25),190 (20), 77 (21), 76 (35). 1H NMR (500 MHz, CDCl3): *δ*H 7.40-7.62 (8H, m, CH of Ar), 7.64 (1H, dd, 3*J*HH = 3.0 Hz, 3*J*HH = 5.0, CH6), 7.67 (1H, t, 3*J*HH = 7.1 Hz, CH7), 7.77 (2H, d, 3*J*HH = 7.4 Hz, 2CH*ortho* of Ph), 8.01 (1H, d, 3*J*HH = 8.2 Hz CH5), 15.61 (1H, b, NH). 13C NMR (125 MHz, CDCl3): *δ*C 100.8 (C2'), 117.1 (CH8), 121.3 (CH4', CH7'), 126.9 (C2), 127.1 (CH6), 127.4 (2CH*ortho* of Ph), 128.2 (2CH*meta* of Ph), 129.6 (CH5), 129.7 (CH*para* of Ph), 131.8 (CH7), 133.1 (CH5' and CH6'), 137.3 (CH4a and CH8a), 139.4 (C3'a and C7'a), 140.2 (*Cipso* of Ph), 141.7 (C3), 155.6 (C1'), 194.9(C3'). Crystal data for **5a** C23H14N2O2 (CCDC 1574850): MW = 350.38, monoclinic, P1 21/c 1, a = 9.0401(8) Å, b = 11.6119(8) Å, c = 15.5685(12) Å, *α* = 90.0, *β* = 95.784(6), *γ* = 90.0, V = 1625.9(2) Å3, Z = 4, Dc = 1.4312 mg/m3, F (000) = 730.3231, radiation, Cu Kα (λ = 1.54178Å), 4.76 ≤ 2*θ* ≤ 65.47, intensity data were collected at 100(2) K with a Bruker APEX area-detector diffractometer, and employing *ω*/2*θ* scanning technique, in the range of -7 ≤ h ≤ 10, -13 ≤ k ≤13, -18 ≤ l ≤ 17; the structure was solved by a direct method, all non-hydrogen atoms were positioned and anisotropic thermal parameters refined from 2583 observed reflections with R (into) = 0.0698 by a full-matrix least-squares technique converged to R = 0.0626 and Raw = 0.1560 [I>2sigma(I)].


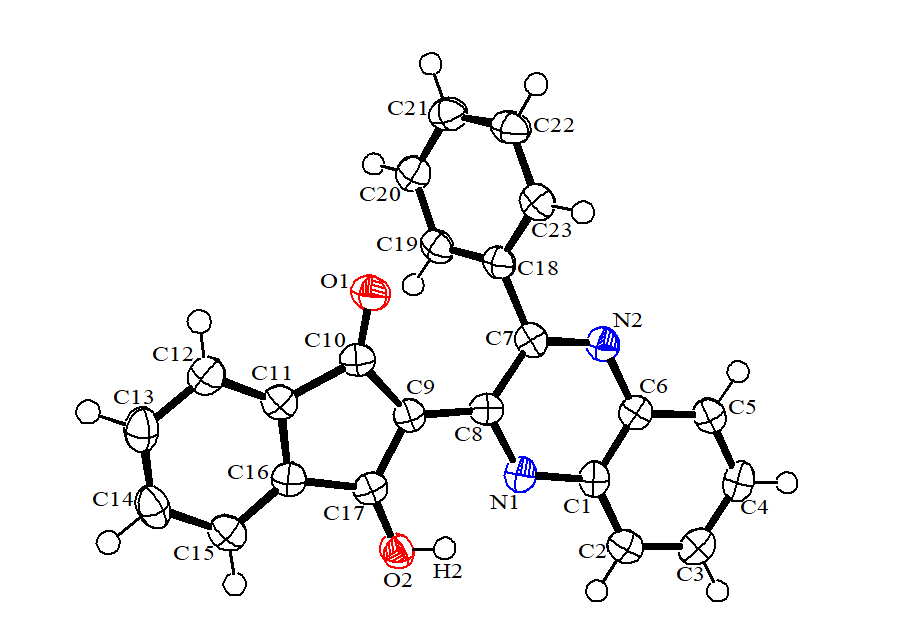


Ortep Diagram of Compound **5a**

**3-Hydroxy-2-(6-methyl-3-phenylquinoxalin-2-yl)-1*H*-inden-1-one** **(5b, major isomer)**.

Orange powder, m.p. = 242-244 °C (decom), 0.35 g, total yield: 95%. IR (KBr) (νmax, cm-1): 3422 (OH), 1688 (C=O), 1616 (C=N), 1572 and 1505 (Ar). Anal. Calcd. for C24H16N2O2 (364.40): C, 79.11; H, 4.43; N, 7.69 %. Found: C, 79.01; H, 4.52; N, 7.85%. MS (EI, 70 eV) *m/z* (%): 365 (M+1, 25), 364 (M+,100), 363 (47), 348 (10), 347 (37), 336 (21), 335 (54), 320 (27), 319 (70), 307 (18), 232 (18), 104 (10), 89 (13). 1H NMR (500 MHz, CDCl3): *δ*H 2.52 (3H, s, CH3), 7.35-7.75 (12H, m, CH of Ar), 15.62 (1H, bs, NH). 13C NMR (125 MHz, CDCl3): *δ*C 21.3 (CH3), 100.4 (C2'), 116.8 (CH8), 121.1 (CH4', CH7'), 124.8 (C2), 127.4 (2CH*meta* of Ph), 128.1 (2CH*ortho* of Ph), 129.0 (CH*para* of Ph), 129.5 (CH6), 132.9 (CH5', CH6'), 133.5 (CH7), 137.4 (*C*6-Me), 137.7 (C4a and C8a), 139.4 (C3'a and C7'a), 140.2 (C3), 141.3 (*Cipso* of Ph), 155.4 (C1'), 190.8 (C3').

**3-Hydroxy-2-(7-methyl-3-phenylquinoxalin-2-yl)-1*H*-inden-1-one** **(5b**′**, minor isomer)**.

Orange powder, m.p. = 242-244 °C (decom), 0.35 g, total yield: 95%. IR (KBr) (νmax, cm-1): 3422 (OH), 1688 (C=O), 1616 (), 1572 and 1505 (Ar). Anal. Calcd. for C24H16N2O2 (364.40): C, 79.11; H, 4.43; N, 7.69 %. Found: C, 79.01; H, 4.52; N, 7.85%. MS (EI, 70 eV) *m/z* (%): 365 (M+1, 25), 364 (M+,100), 363 (47), 348 (10), 347 (37), 336 (21), 335 (54), 320 (27), 319 (70), 307 (18), 232 (18), 104 (10), 89 (13). 1H NMR (500 MHz, CDCl3): *δ*H 2.50 (3H, s, CH3), 7.35-7.75 (12H, m, CH of Ar), 15.62 (1H, bs, NH). 13C NMR (125 MHz, CDCl3): *δ*C 22.0 (CH3), 100.4 (C2'), 116.6 (CH8), 121.1 (CH4' and CH7'), 124.8 (C2), 127.4 (2CH*meta* of Ph), 128.1 (2CH*ortho* of Ph), 129.0 (CH*para* of Ph), 129.2 (CH6), 129.4 (CH5), 132.9 (CH5', CH6'), 135.7 (*C*7-Me), 135.9 (C4a and C8a), 139.4 (C3'a and C7'a), 141.6 (*Cipso* of Ph), 143.2 (C3), 154.3 (C1'), 190.8 (C3').

**3-Hydroxy-2-(3-(*p*-tolyl)quinoxalin-2-yl)-1*H*-inden-1-one (5c).**

Orange powder, m.p. = 252-254 °C, 0.357 g, yield: 98%. IR (KBr) (νmax, cm-1): 3430 (OH), 1683 (C=O), 1611 (C=N), 1567 and 1500 (Ar). Anal. Calcd. for C24H16N2O2 (364.40): C, 79.11; H, 4.43; N, 7.69 %. Found: C, 79.05; H, 4.55; N, 7.80%. MS (EI, 70 eV) *m/z* (%): 365 (M+1, 26), 364 (M+, 100), 363 (36), 349 (38), 348 (11), 347 (36), 336 (17), 335 (41), 321 (25), 320 (34), 319 (71), 307 (16), 305 (23), 192 (13), 190 (16), 76 (12). 1H NMR (500 MHz, CDCl3): *δ*H 2.44 (3H, s, CH3), 7.27 (1H, d, 3*J*HH = 7.3 Hz, CH8), 7.52-7.60 (4H, m, CH of Ar), 7.65 (1H, d, 3*J*HH = 5.2 Hz, CH4'), 7.55 (2H, d, 3*J*HH = 7.8 Hz, 2CH of Ar), 7.68 (2H, d, 3*J*HH = 7.8 Hz, 2CH of Ar), 8.00 (1H, d, 3*J*HH = 8.0 Hz, CH5), 15.60 (1H, b, NH). 13C NMR (125 MHz, CDCl3): *δ*C 21.6 (CH3 of Ar), 101.0 (C2'), 117.0 (CH8), 121.2 (CH4' and CH7'), 126.7 (C2), 127.0 (CH6), 127.3 (2CHof Ar), 128.9 (2CH of Ar), 129.5 (CH5), 131.5 (CH7), 133.0 (CH5' and CH6'), 137.4 (CH4a and CH8a), 137.4 (*Cipso*-CH3), 139.5 (*Cipso*-C=N), 139.7 (C3a' and C7a'), 141.7 (C3), 155.5 (C1'), 186.0 (C3').

**3-Hydroxy-2-(6-methyl-3-(*p*-tolyl)quinoxalin-2-yl)-1*H*-inden-1-one** **(5d, major isomer)**.

Orange powder, m.p. = 253-255 °C (decom), 0.36 g, yield: 67% (total yield: 94%). IR (KBr) (νmax, cm-1): 3428 (OH), 1684 (C=O), 1611 (C=N), 1569 and 1502 (Ar). Anal. Calcd. for C25H18N2O2 (378.14) C, 79.35; H, 4.79; N, 7.40%. Found: C, 79.02; H, 4.59; N, 7.62%. MS (EI, 70 eV) *m/z* (%): 379 (M+1, 27), 378 (M+, 100), 377 (33), 363 (30), 362 (13), 361 (41), 350 (17), 349 (37), 335 (24), 334 (36), 333 (72), 321 (15), 319 (20), 245 (10), 232 (10), 104 (10), 89 (13). 1H NMR (500 MHz, CDCl3): *δ*H 2.41 (3H, s, CH3), 2.54 (3H, s, CH3), 7.26 (2H, d, 3*J*HH = 7.0 Hz, 2CH of Ar), 7.37 (1H, d, 3*J*HH = 8.3 Hz, CH6), 7.40 (1H, s, CH8), 7.54-7.55 (2H, m, CH5' and CH6'), 7.60-7.65 (2H, m, CH4' and CH7'), 7.68 (2H, d, 3*J*HH = 7.0 Hz, 2CH of Ar), 7.89 (1H, d, 3*J*HH = 8.3 Hz, CH5), 15.61 (1H, b, NH). 13C NMR (125MHz, CDCl3): *δ*C 21.4 (CH3), 21.7 (CH3), 100.7 (C2'), 116.8 (CH8), 121.2 (CH4', CH7'), 124.7 (C2), 127.3 (CH5), 127.4 (2CH of Ar), 129.0 (2CH of Ar), 133.0 (CH5' and CH6'), 133.4 (CH7), 137.6 (*C6*-Me), 137.6 (*Cipso*-CH3), 137.8 (C4a and C8a), 139.5 (C3'a and C7'a), 139.6 (*Cipso*-C=N), 143.0 (C3), 154.4 (C1'), 190.5 (C3').

**3-Hydroxy-2-(7-methyl-3-(*p*-tolyl) quinoxalin-2-yl)-1*H*-inden-1-one (5d**′**, minor isomer).**

Orange powder, m.p. = 253-255 °C (decom), 0.36 g, yield: 33% (total yield: 94%). IR (KBr) (νmax, cm-1): 3428 (OH), 1684 (C=O), 1611 (C=N), 1569 and 1502 (Ar). Anal. Calcd. for C25H18N2O2 (378.14) C, 79.35; H, 4.79; N, 7.40%. Found: C, 79.02; H, 4.59; N, 7.62%. MS (EI, 70 eV) *m/z* (%): 379 (M+1, 27), 378 (M+, 100), 377 (33), 363 (30), 362 (13), 361 (41), 350 (17), 349 (37), 335 (24), 334 (36), 333 (72), 321 (15), 319 (20), 245 (10), 232 (10), 104 (10), 89 (13). 1H NMR (500 MHz, CDCl3): *δ*H 2.41 (3H, s, CH3), 2.57 (3H, s, CH3), 7.26 (2H, d, 3*J*HH = 7.0 Hz, 2CH of Ar), 7.37 (1H, d, 3*J*HH = 8.3 Hz, CH6), 7.40 (1H, s, CH8), 7.54-7.55 (2H, m, CH5' and CH6'), 7.60-7.65 (2H, m, CH4' and CH7'), 7.68 (2H, d, 3*J*HH = 7.0 Hz, 2CH of Ar), 7.89 (1H, d, 3*J*HH = 8.3 Hz, CH5), 15.61 (1H, b, NH). 13C NMR (125 MHz, CDCl3): *δ*C 21.4 (CH3), 22.0 (CH3), 100.8 (C2'), 116.6 (CH8), 121.2 (CH4' and CH7'), 126.7 (C2), 127.4 (2CH of Ar), 129.0 (2CH of Ar), 129.1 (CH6),129.2 (CH5), 133.0 (CH5' and CH6'), 136.1 (C4a and C8a) 137.6 (*C7*-Me), 137.6 (*Cipso*-CH3), 139.6 (*Cipso*-C=N), 139.5 (C3'a and C7'a), 143.0 (C3), 155.4 (C1'), 190.5 (C3').

**3-Hydroxy-2-(3-(3-methoxyphenyl)quinoxalin-2-yl)-1*H*-inden-1-one** **(5e)**.

Orange powder, m.p. = 224-226 °C, 0.37 g, yield: 98%. IR (KBr) (νmax, cm-1): 3431 (OH), 1689 (C=O), 1569 and 1502 (Ar). Anal. Calcd. for C24H16N2O3 (380.40): C, 75.78; H, 4.24; N, 7.36 %. Found: C, 75.70; H, 4.26; N, 7.26 %. MS (EI, 70 eV) *m/z* (%): 381 (M+1, 27), 380 (M+, 100), 379 (19), 363 (46), 352 (24), 351 (37), 349 (17), 337 (36), 336 (39), 335 (87), 321 (25), 309 (15), 305 (16) 190 (23), 76 (15). 1H NMR (500 MHz, CDCl3): *δ*H 3.33 (3H, s, CH3), 6.53-7.49 (12H, m, CH of Ar), 15.10 (1H, bs, NH). 13C NMR (125 MHz, CDCl3): *δ*C 54.3 (CH3), 99.9 (C2'), 112.0 (CH2''), 114.6 (CH4''), 116.1 (CH8), 119.1 (CH6''), 120.3 (CH4', CH7'), 126.0 (C2), 126.1 (CH6), 128.2 (CH5), 128.7 (CH5''), 130.1 (CH7), 132.1(CH5' and CH6'), 136.2 (C4a and C8a), 138.5 (C3'a and C7'a), 140.35 (C*ipso* of Ar), 140.7 (C3), 154.3 (C1'), 158.6 (*C*-OMe), 190.3 (C3).

**3-Hydroxy-2-(3-(3-methoxyphenyl)-6-methylquinoxalin-2-yl)-1*H*-inden-1-one(5f, major isomer)**.

Orange powder, m.p. = 202-204 °C (decom), 0.38 g, yield: 65% (total yield: 97%). IR (KBr) (νmax, cm-1): 3426 (OH), 1687 (C=O), 1573 and 1506 (Ar). Anal. Calcd. for C25H18N2O3 (394.43): C, 76.13; H, 4.60; N, 7.10%. Found: C, 76.10; H, 4.55; N, 7.26%. MS (EI, 70 eV) *m/z* (%): 395 (M+1, 28), 394 (M+, 100), 393 (19), 378 (16), 377 (50), 366 (20), 365 (35), 363 (14), 351 (35), 350 (39), 349 (92), 335 (24), 334 (12), 323 (14), 322 (10), 319 (15), 247 (13), 232 (12), 104 (15), 89 (11), 76 (11). 1H NMR (500 MHz, CDCl3) *δ*H 2.54 (3H, s, CH3), 3.85 (3H, s, CH3), 7.04 (1H, dd, 3*J*HH = 7.5 Hz, 4*J*HH = 1.5 Hz, CH4''), 7.34 (1H, s, CH2"), 7.33-7.40 (1H, m, CH5"), 7.35 (1H, d, 3*J*HH = 8.0 Hz, CH6"), 7.38 (1H, d, 3*J*HH = 8.0 Hz, CH7), 7.52 (1H, d, 3*J*HH = 8.0 Hz, CH8), 7.53-7.55 (2H, m, CH of Ar), 7.61-7.65 (2H, m, CH of Ar), 7.82 (1H, s, CH5), 15.61 (1H, bs, NH). 13C NMR (125 MHz, CDCl3): *δ*C 20.9 (CH3), 54.8 (CH3), 100.1 (C2'), 112.5 (CH2''), 115.1 (CH4''), 116.3 (CH8), 119.6 (CH6''), 120.7 (CH4', CH7'), 124.4 (C2), 128.6 (CH5), 128.7 (CH5''), 132.5 (CH5' and CH6'), 133.2 (CH7), 136.9 (*C*6-Me), 137.3 (C4a and C8a), 138.9 (C3'a and C7'a), 140.9 (*Cipso*-C=N), 142.8 (C3), 154.7 (C1'), 159.0 (*Cipso*-OMe), 190.3 (C3').

**3-Hydroxy-2-(3-(3-methoxyphenyl)-7-methylquinoxalin-2-yl)-1*H*-inden-1-one (5f**′**, minor isomer)**.

Orange powder, m.p. = 202-204 °C (decom), 0.38 g, yield: 35% (total yield: 97%). IR (KBr) (νmax, cm-1): 3426 (OH), 1687 (C=O), 1573 and 1506 (Ar). Anal. Calcd. for C25H18N2O3 (394.43): C, 76.13; H, 4.60; N, 7.10%. Found: C, 76.10; H, 4.55; N, 7.26%. MS (EI, 70 eV) *m/z* (%): 395 (M+1, 28), 394 (M+, 100), 393 (19), 378 (16), 377 (50), 366 (20), 365 (35), 363 (14), 351 (35), 350 (39), 349 (92), 335 (24), 334 (12), 323 (14), 322 (10), 319 (15), 247 (13), 232 (12), 104 (15), 89 (11), 76 (11). 1H NMR (500 MHz, CDCl3) *δ*H 2.57 (3H, s, CH3), 3.85 (3H, s, CH3), 7.04 (1H, dd, 3*J*HH = 7.5 Hz, 4*J*HH = 1.5 Hz, CH4''), 7.34 (1H, s, CH2"), 7.33-7.40 (1H, m, CH5"), 7.35 (1H, d, 3*J*HH = 8.0 Hz, CH6"), 7.38 (1H, d, 3*J*HH = 8.0 Hz, CH7), 7.52 (1H, d, 3*J*HH = 8.0 Hz, CH8), 7.53-7.55 (2H, m, CH of Ar), 7.61-7.65 (2H, m, CH of Ar), 7.82 (1H, s, CH5), 15.61 (1H, bs, NH). 13C NMR (125 MHz, CDCl3): *δ*C 21.5 (CH3), 54.8 (CH3), 100.1 (C2'), 112.5 (CH2''), 115.1 (CH4''), 116.1 (CH8), 119.6 (CH6''), 120.7 (CH4' and CH7'), 123.4 (C2), 128.6 (CH5), 128.8 (CH5''), 132.5 (CH5' and CH6'), 133.2 (CH6), 136.9 (*C*7-Me), 137.3 (C4a and C8a), 139.0 (C3'a and C7'a), 140.9 (*Cipso*-C=N), 142.8 (C3), 154.7 (C1'), 159.3 (*Cipso*-OMe), 190.3 (C3').

**3-Hydroxy-2-(3-phenyl-5,6-dihydropyrazin-2-yl)-1*H*-inden-1-one (6).**

Orange powder, m.p. = 220-222 °C, 0.135 g, yield: 45%. IR (KBr) (νmax, cm-1): 3212 (OH), 1692 (C=O), 1634 (C=N). Anal. Calcd. for C19H14N2O2 (302.11): C, 75.48; H, 4.67; N, 9.27 %. Found: C, 75.45; H, 4.69; N, 9.25 %. MS (EI, 70 eV) *m/z* (%): 303 (M+1, 25), 302 (M+, 97), 301 (25), 274 (15), 273 (49), 189 (14), 172 (13), 171 (79), 131 (13), 130 (11), 115 (15), 104 (48), 103 (100), 77 (19), 76 (21). 1H NMR (500 MHz, CDCl3): *δ*H 3.40 (2H, t, 3*J*HH = 6.1 Hz, CH2NH), 3.84 (2H, t, 3*J*HH = 5.5 Hz, CH2N), 7.30 (3H, t, 3*J*HH = 7.5 Hz, 2CH*meta* of Ph), 7.31 (1H, t, 3*J*HH = 7.5 Hz, CH*para* of Ph), 7.33-7.57 (2H, m, 2CH of ph), 7.59 (3H, d, 3*J*HH = 7.0 Hz, 2CH*ortho* of Ph and CH4'), 7.62 (1H, bs, CH7'), 11.00 (1H, bs, NH). 13C NMR (125 MHz, CDCl3): *δ*C 31.5 (CH2), 42.3 (CH2), 97.2 (C2'), 116.1 (CH4' and CH7'), 121.4 (C2 and 2CH*meta* of Ph), 122.9 (2CH*ortho* of Ph), 124.5 (CH*para* of Ph), 128.6 (CH5'and CH6'), 134.1 (*Cipso* of Ph), 134.3 (C3'a and C7'a), 143.4 (C3), 157.4 (C1'), 188.4 (C3').

**2,2'-((Ethane-1,2-diylbis(azanediyl))bis(2-oxo-2-phenylethan-1-yl-1-ylidene))bis(1*H*-indene-1,3(2*H*)-dione) (7).**

Bright yellow powder, m.p. = 212-214 °C, 0.12 g, yield: 40%. IR (KBr) (νmax, cm-1): 3180 (NH), 1668 (C=O), 1565 and 1496 (Ar). Anal. Calcd. for C36H24N2O6 (580.60): C, 74.47; H, 4.17; N, 4.83 %. Found: C, 74.45; H, 4.20; N, 4.78 %. MS (EI, 70 eV) *m/z* (%): 580 (M+, 4), 434 (15), 303 (10), 291 (38), 290 (28), 250 (24), 198 (22), 185 (11), 172 (22), 171 (12), 105 (100), 104 (16), 91 (13), 77 (73), 76 (16). 1H NMR (500 MHz, CDCl3): *δ*H 2.70-2.74 (2H, m, CH2NH), 2.85-2.89 (2H, m, CH2N), 7.42-7.53 (6H, m, 4CH*meta* of Ph and CH5 and CH6), 7.62-7.78 (6 H, m,4CH*ortho* of Ph, CH4 and CH7), 7.55-7.59 (2H, m, 2CH*para* of ph), 7.82 (2H, d, 3*J*HH = 7.2 Hz, CH7' and CH4'), 7.92 (2H, t, 3*J*HH = 8.5 Hz, CH5' and CH4'), 10.00 (2H, bs, NH). 13C NMR (125 MHz, CDCl3): *δ*C 45.7 (CH2), 45.9 (CH2), 102.5 (C2), 121.4 (CH4 and CH7), 121.8 (CH4' and CH7'), 129.6 (2CH*ortho* of Ph), 129.7 (2CH*ortho* of Ph), 129.1 (4CH*meta* of Ph), 134.2 (CH5 and CH6), 134.3 (CH5' and CH6'), 134.4 (CH*para* of ph),134.4 (CH*para* of ph), 135.3 (2*Cipso* of Ph), 139.0 (C7a), 139.1 (C7'a), 139.9 (C3a), 139.9 (C3'a),.160.8 (C2'), 161.0 (C2"), 187.9 (Ph-*C=O*), 188.0 (Ph-*C=O*), 190.4 (C3), 190.39 (C3'), 191.9 (C1), 192.0 (C1').

**2-(2-Oxo-1-((2-oxo-2-phenylethyl)thio)-2-phenylethylidene)-1*H*-indene-1,3(2*H*)-dione (I).**

Yellow powder, m.p. = 170-172 °C, 0.28 g, yield: 70% (total yield: 90%).). IR (KBr) (νmax, cm-1): 3433 (NH), 1646 (C=O), 1586 and 1467 (Ar), 1013 (C-S). Anal. Calcd. for C25H16O4S (412.46): C, 72.80; H, 3.91%. Found: C, 72.82; H, 3.88%. 1H NMR (500 MHz, CDCl3): *δ*H 4.19 (1H, d, 2*J*HH = 16.1 Hz, CH2), 4.41 (1H, d, 2*J*HH = 16.1 Hz, CH2), 7.41 (2H, t, 3*J*HH = 7.5 Hz, 2CH*meta* of Ph), 7.44-7.48 (2H, m, CH of Ar), 7.57-7.62 (3H, m, CH of Ar), 7.78 (2H, d, 3*J*HH = 7.5 Hz, CH*ortho* of Ph), 8.80 (1H, s, NH). 13C NMR (125 MHz, CDCl3): *δ*C 9.1 (CH3), 46.3 (*CH2*-N), 121.0 (CH4), 121.2 (CH7), 123.8 (C2), 128.4 (2CH*meta*of Ph), 129.4 (2CH*ortho* of Ph), 132.0 (CH*para* of Ph), 133.3 (CH5), 133.3 (CH6), 136.5 (C3a), 137.9 (C7a), 141.8 (*Cipso* of Ph), 188.0 (C3), 189.0 (C1), 192.2 (*C*-S), 203.2 (Ph-*C=O*).


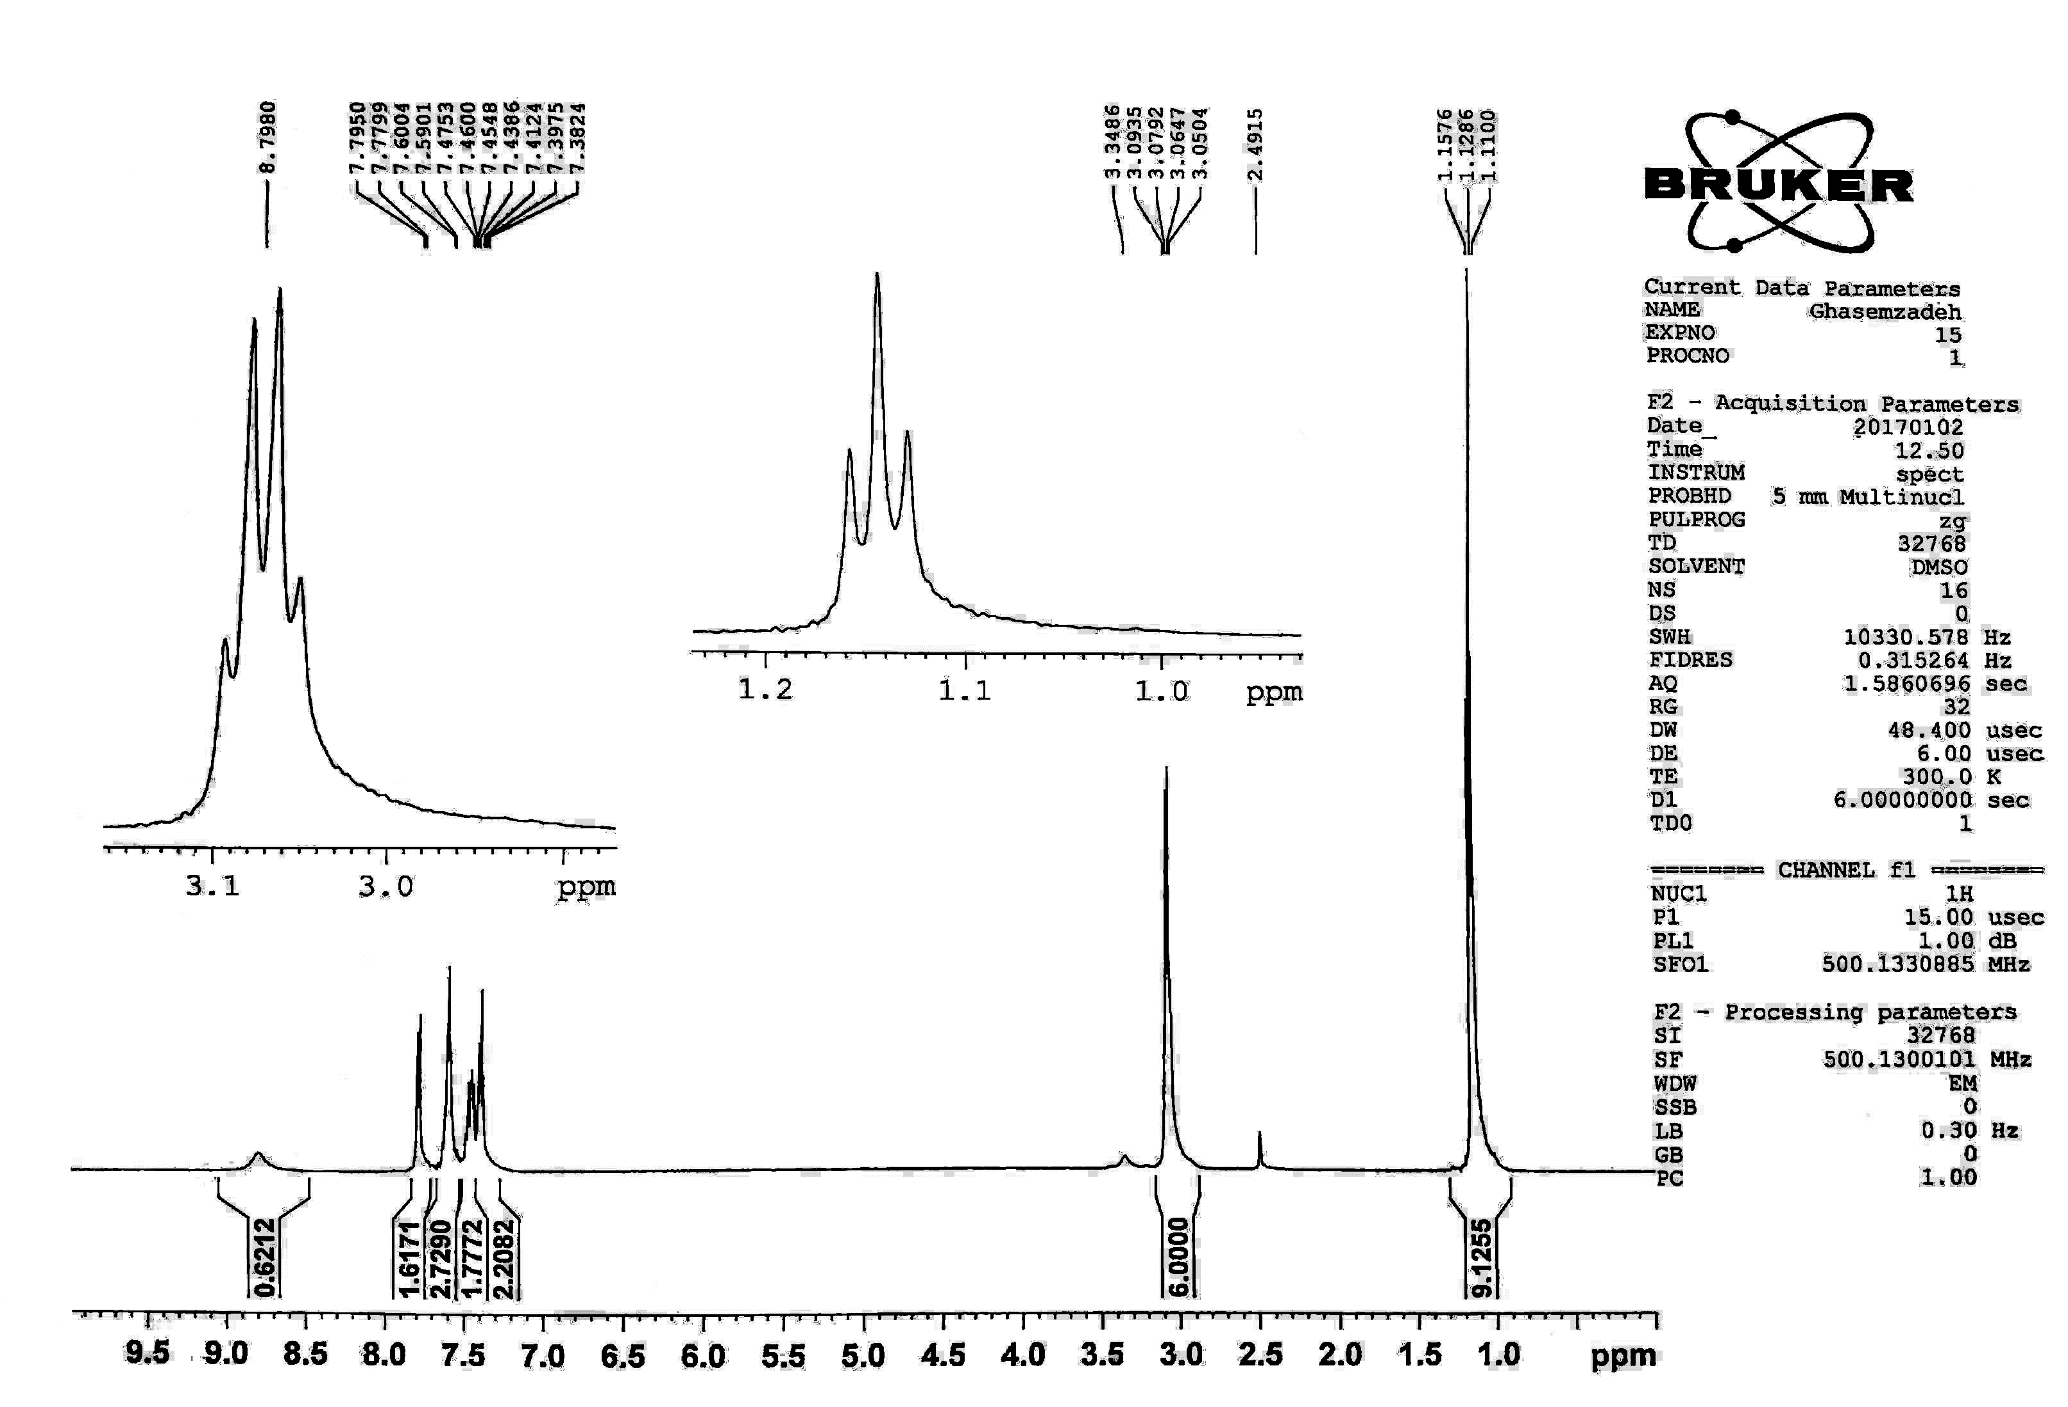


1H NMR of **2a**

***
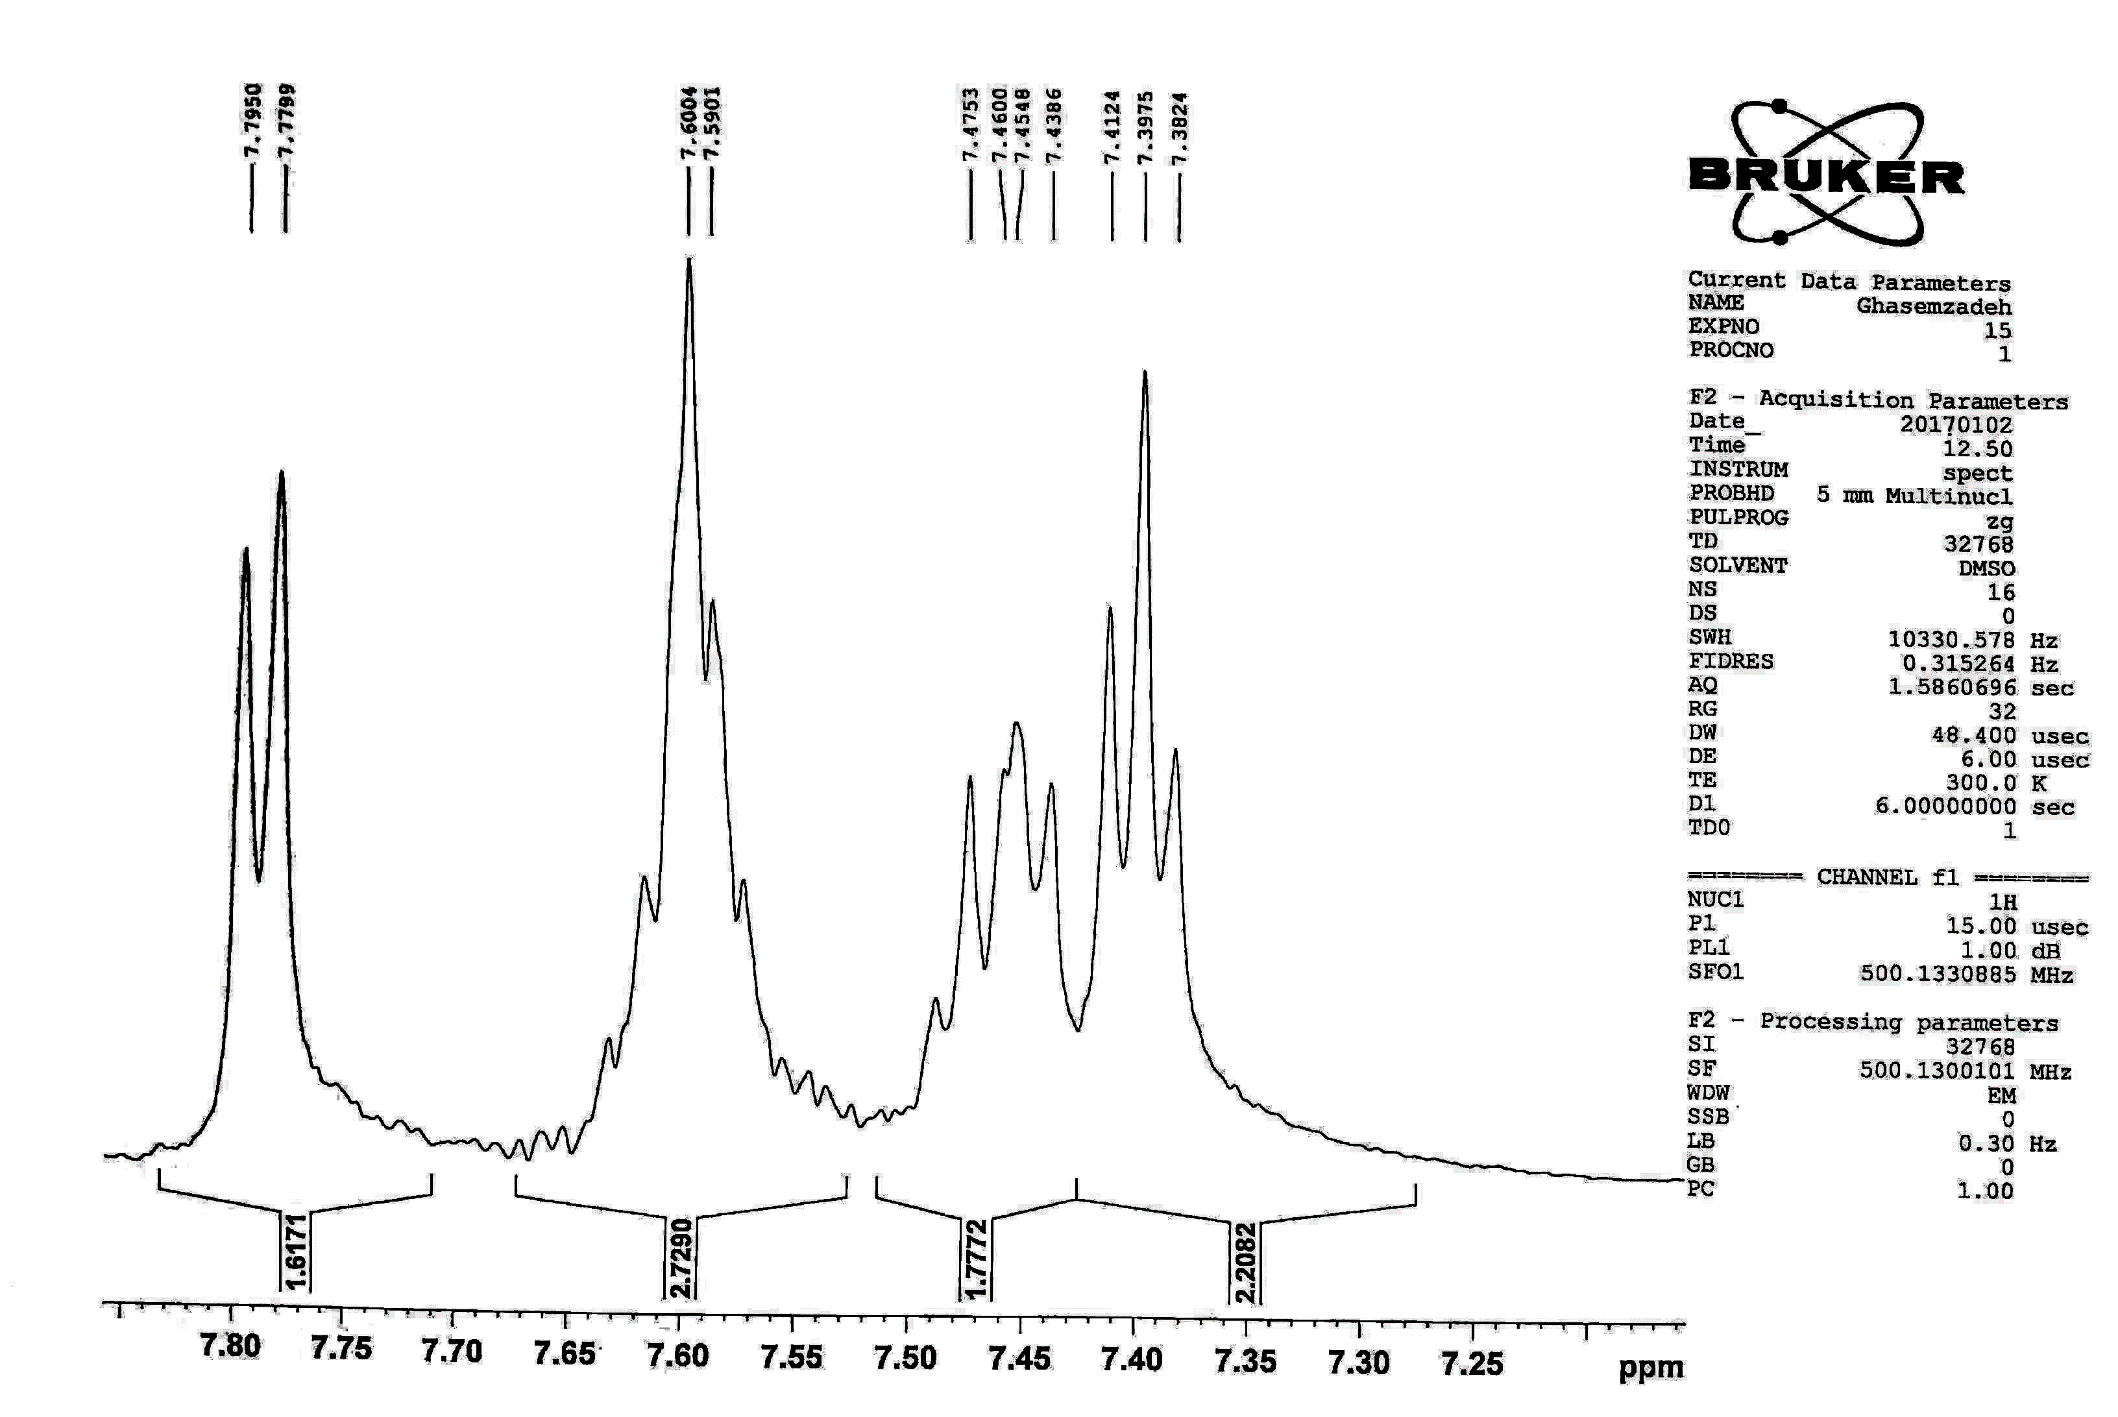
***

1H NMR of **2a**


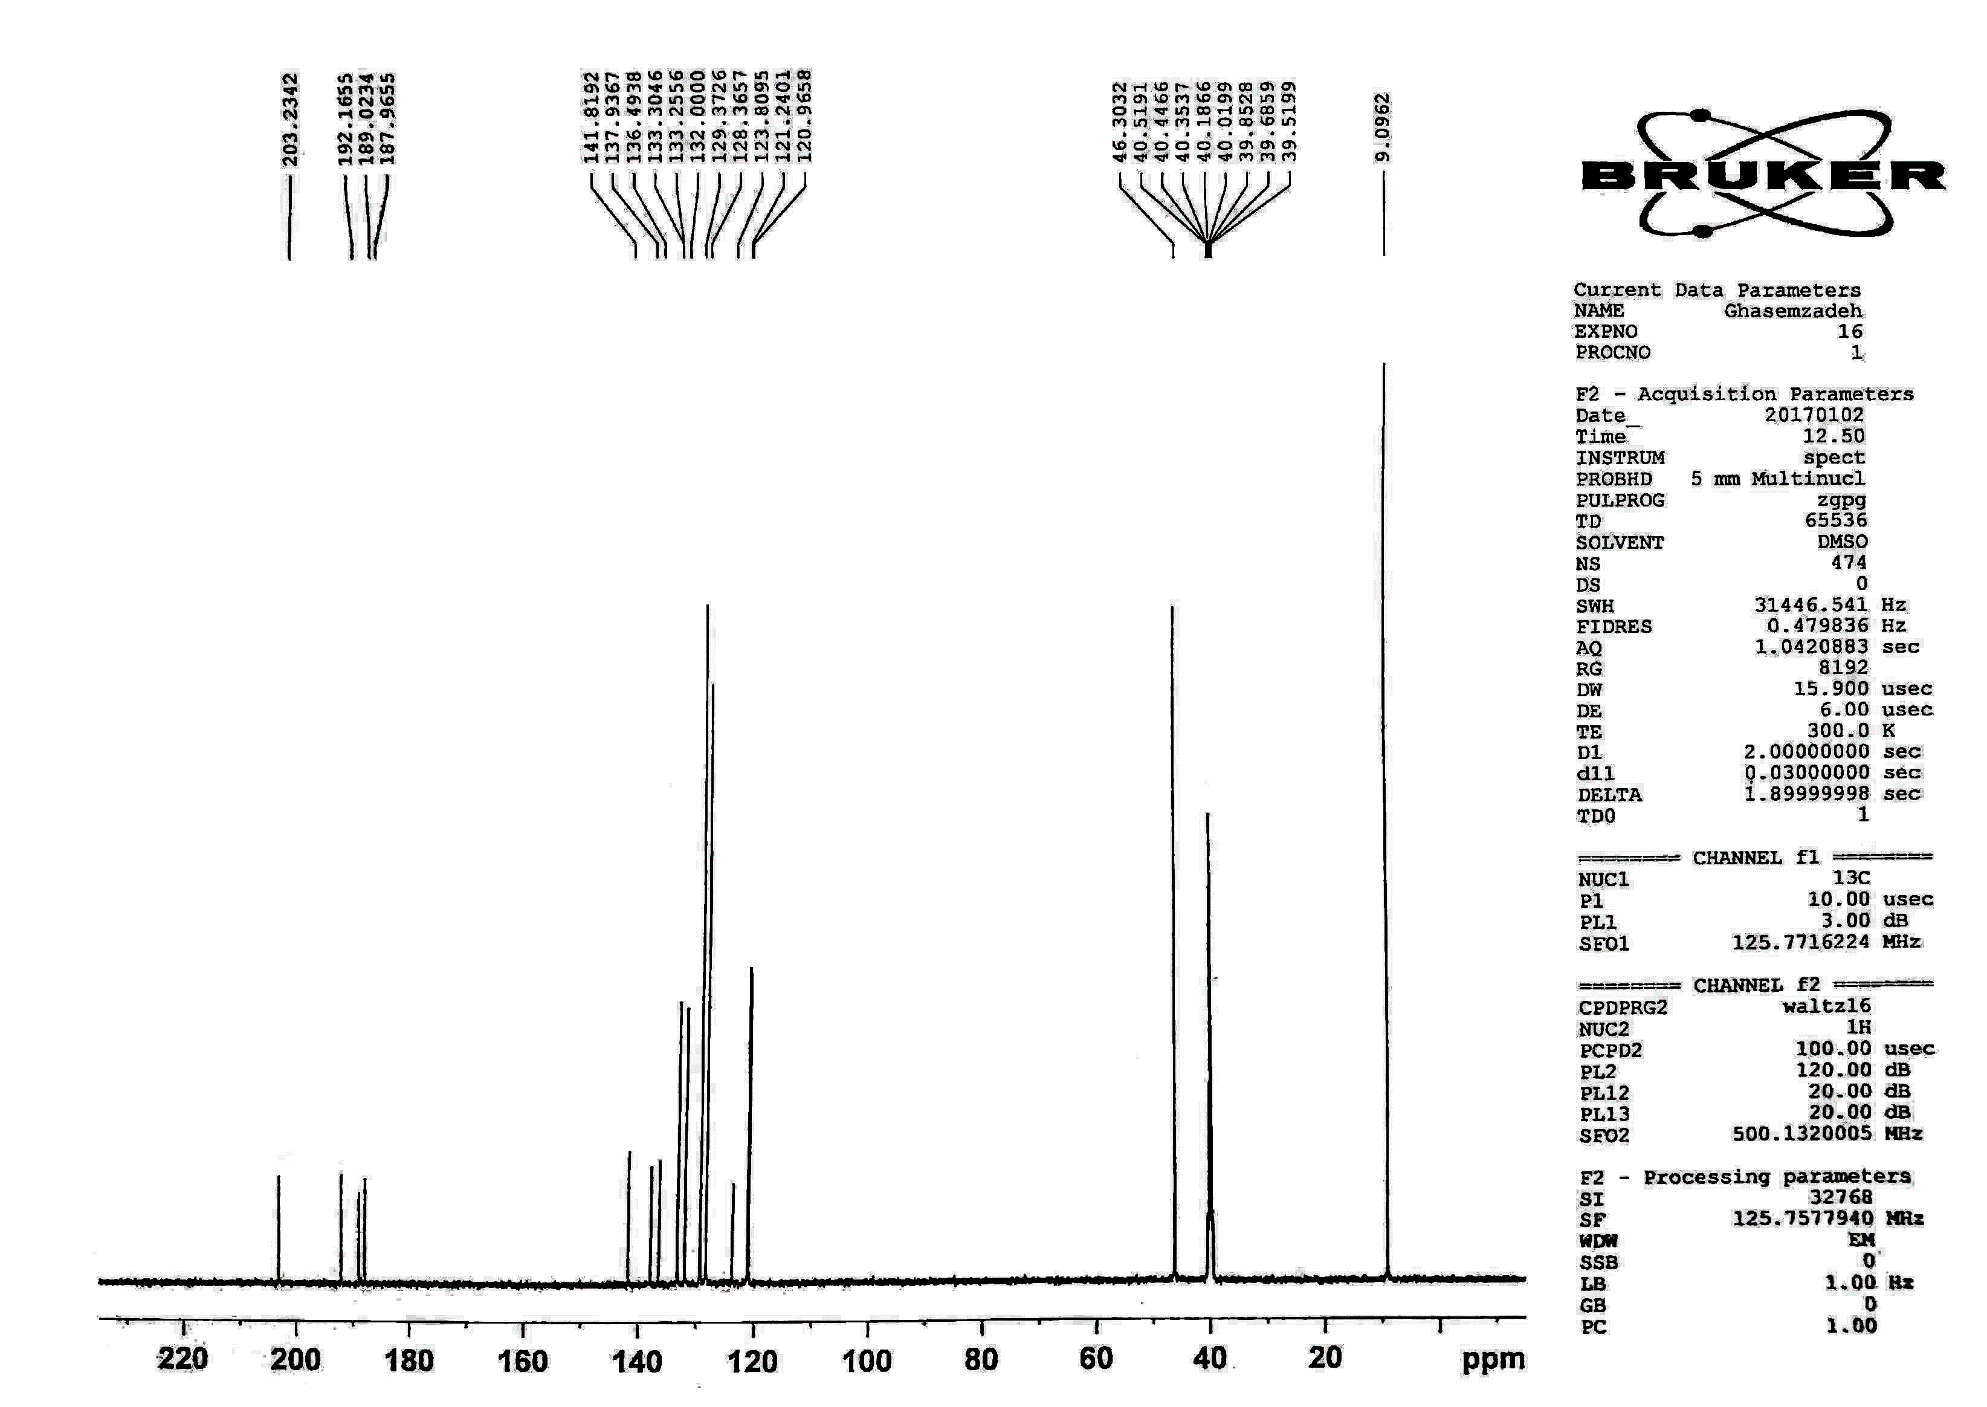


13C NMR of **2a**


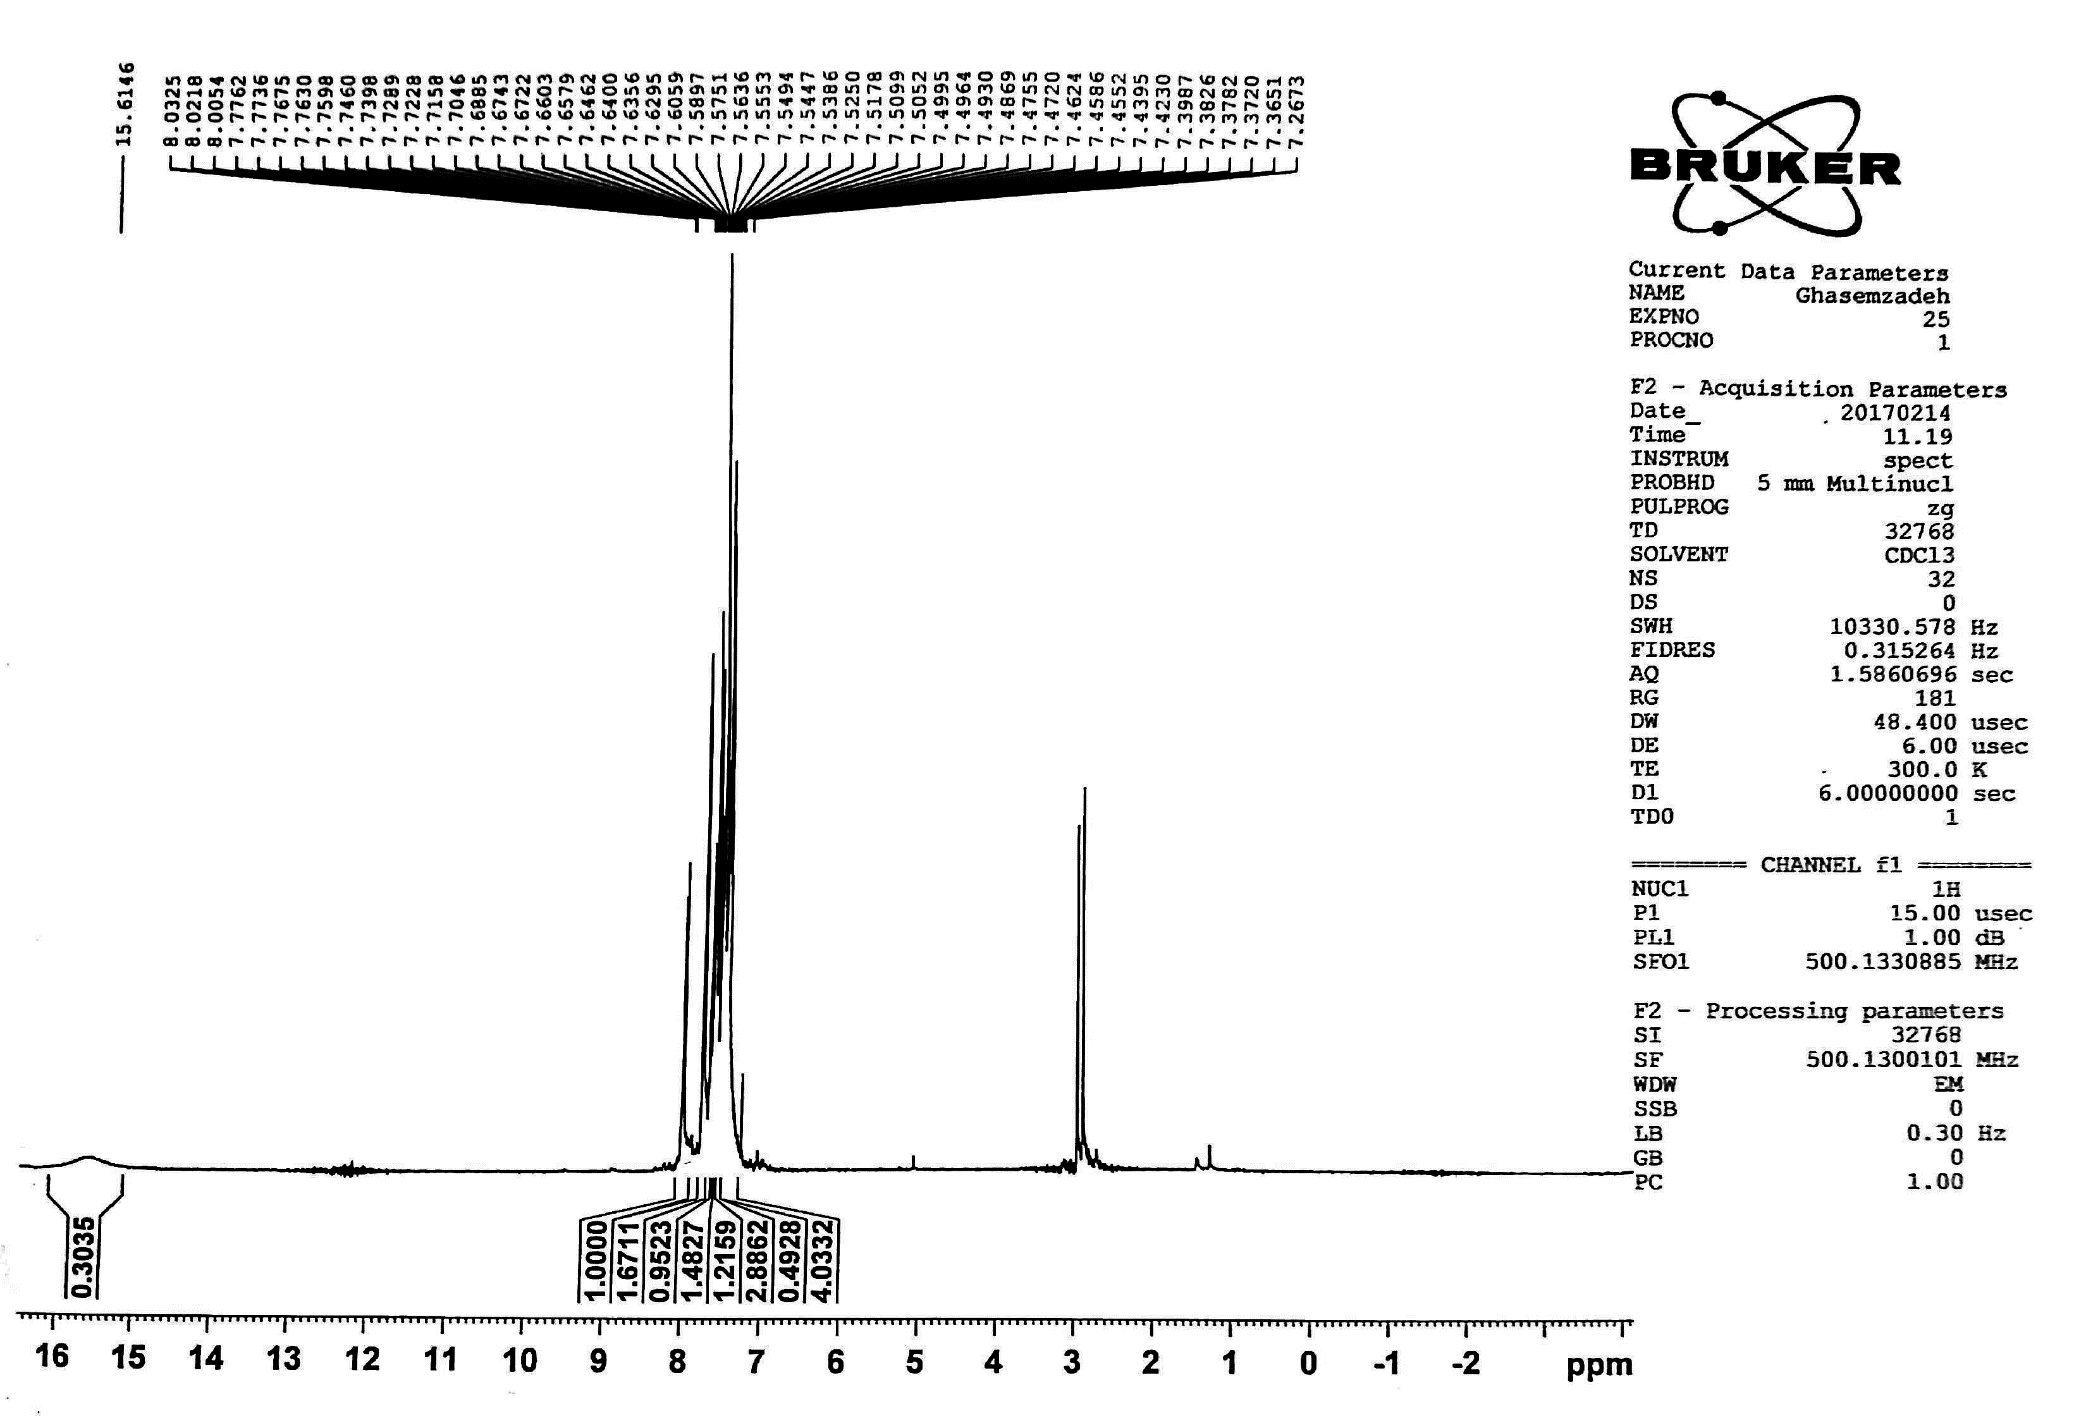


1H NMR of **5a**

**
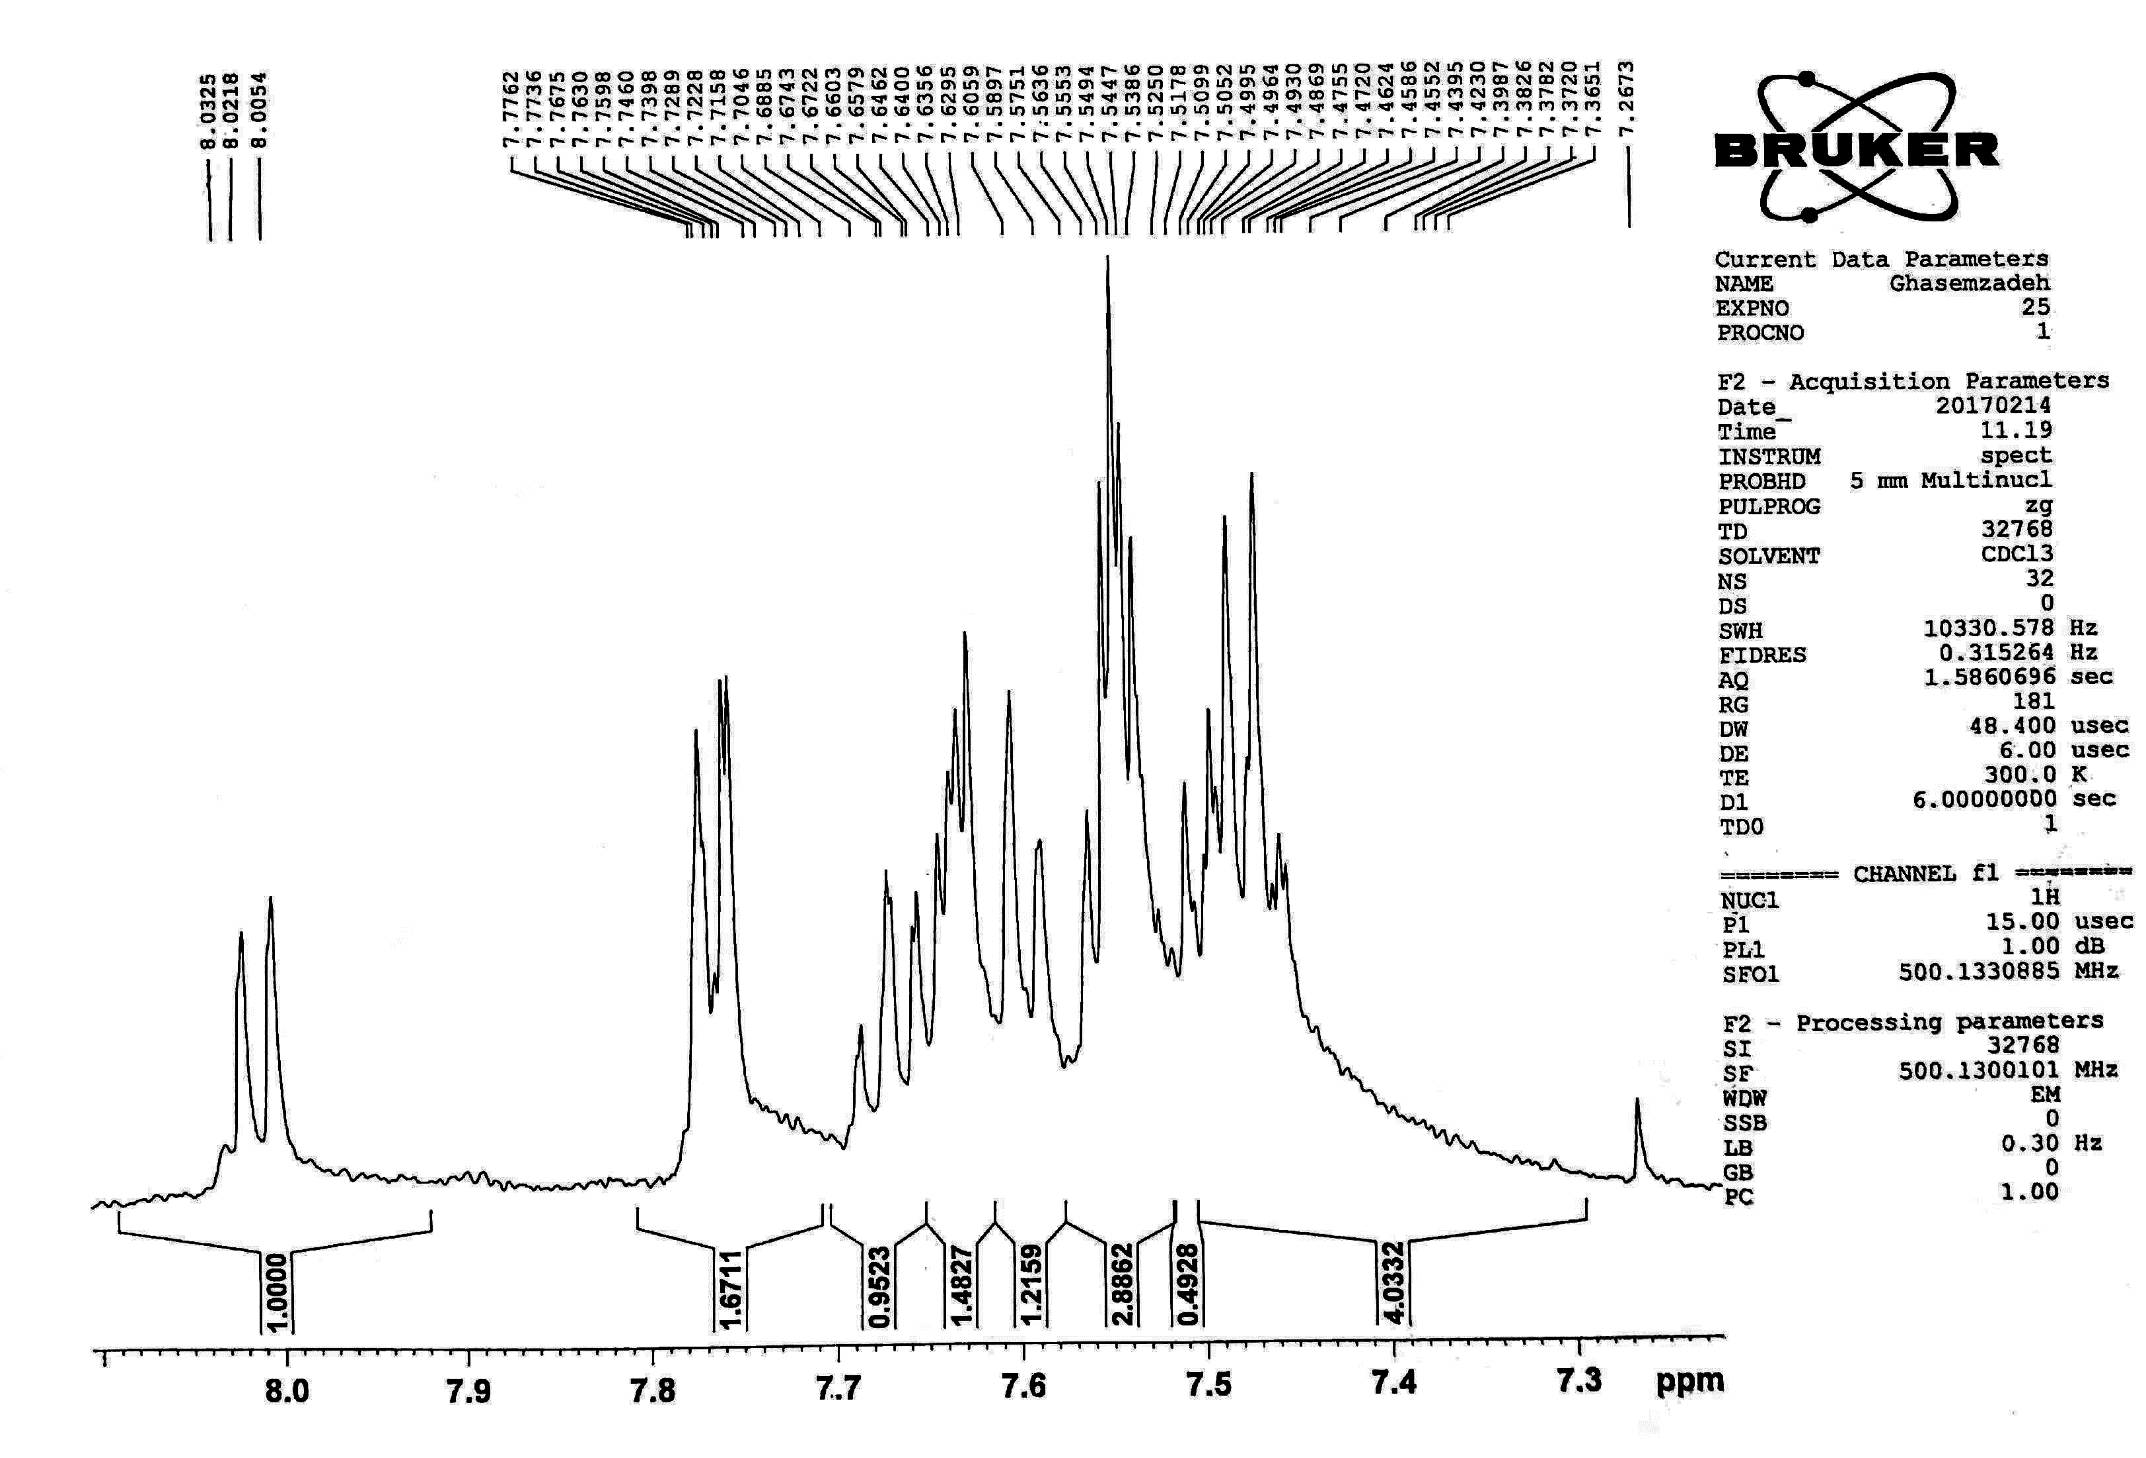
**

1H NMR of **5a**

**
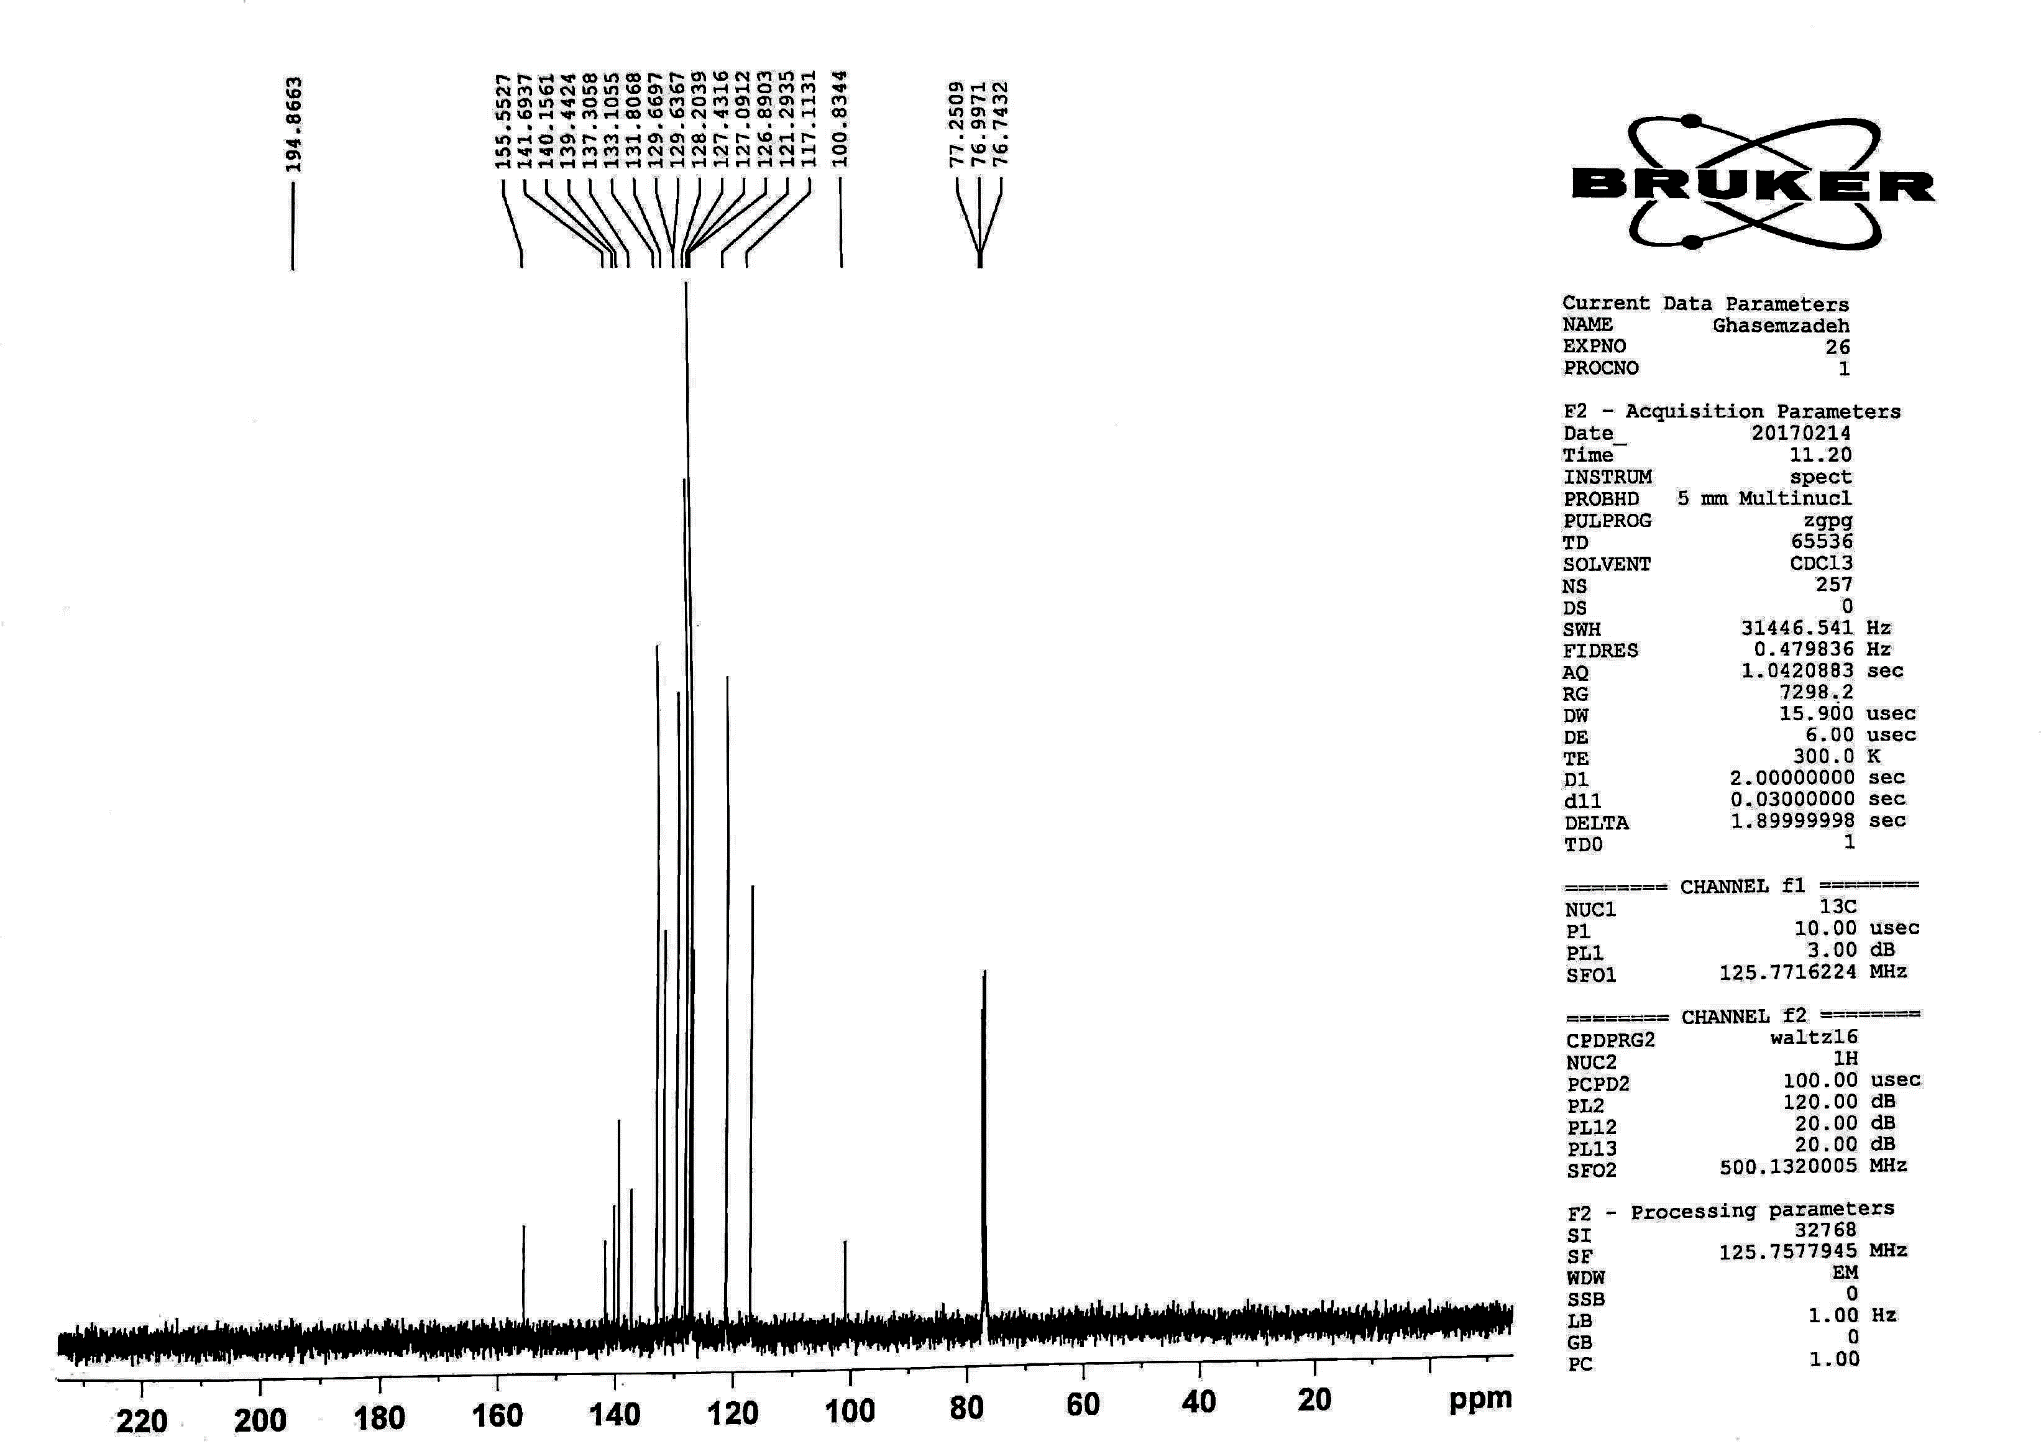
**

13C NMR of **5a**

Mass spectrum of **5a**


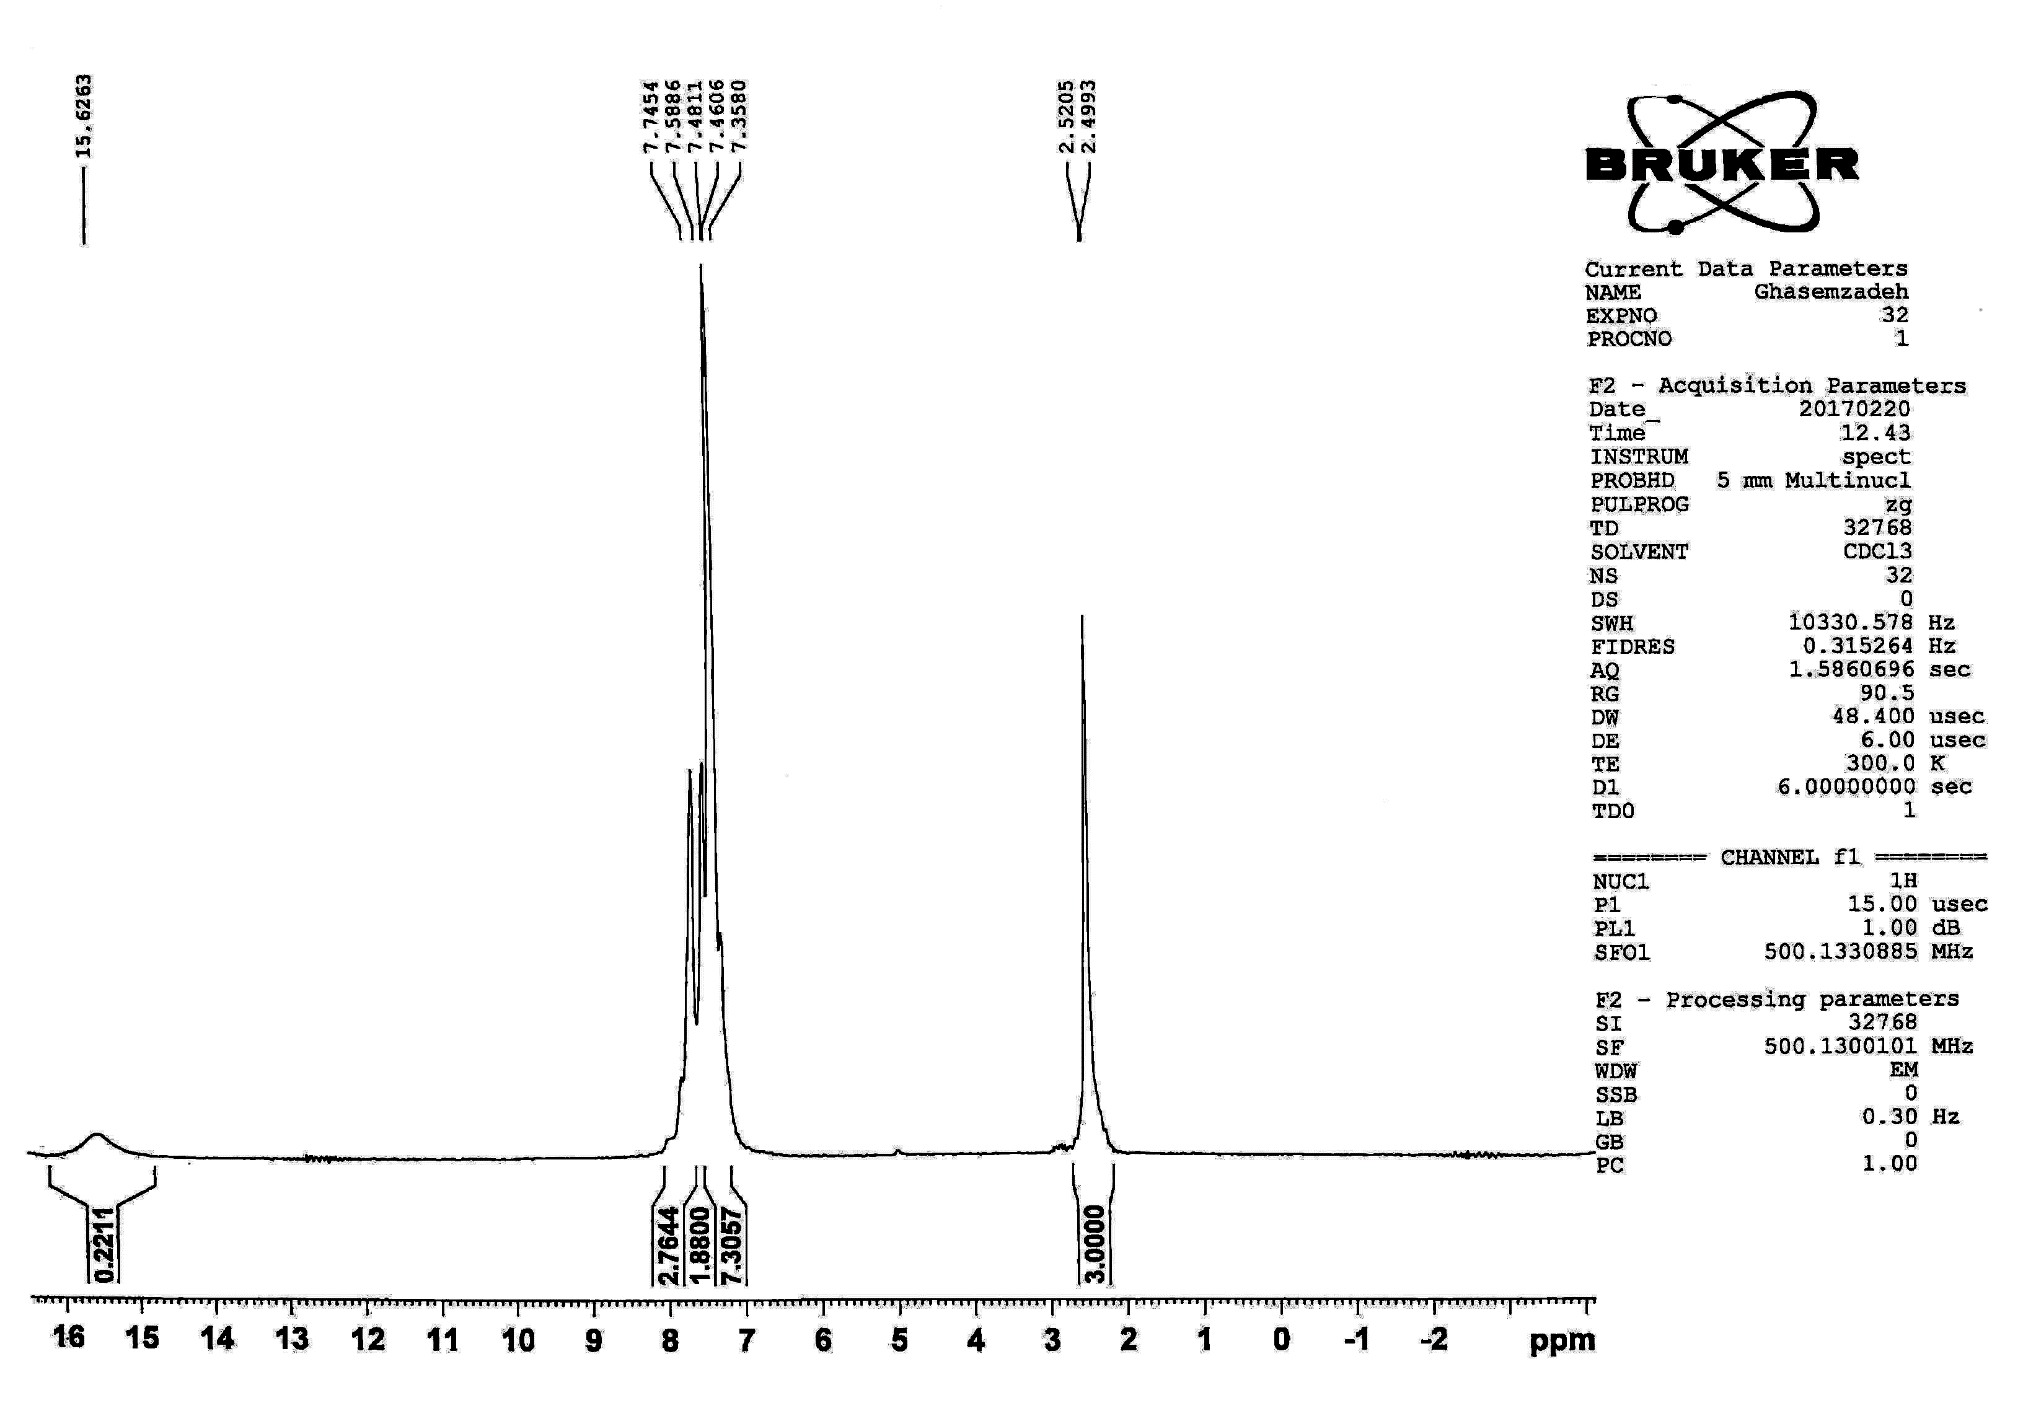


1H NMR of **5b**


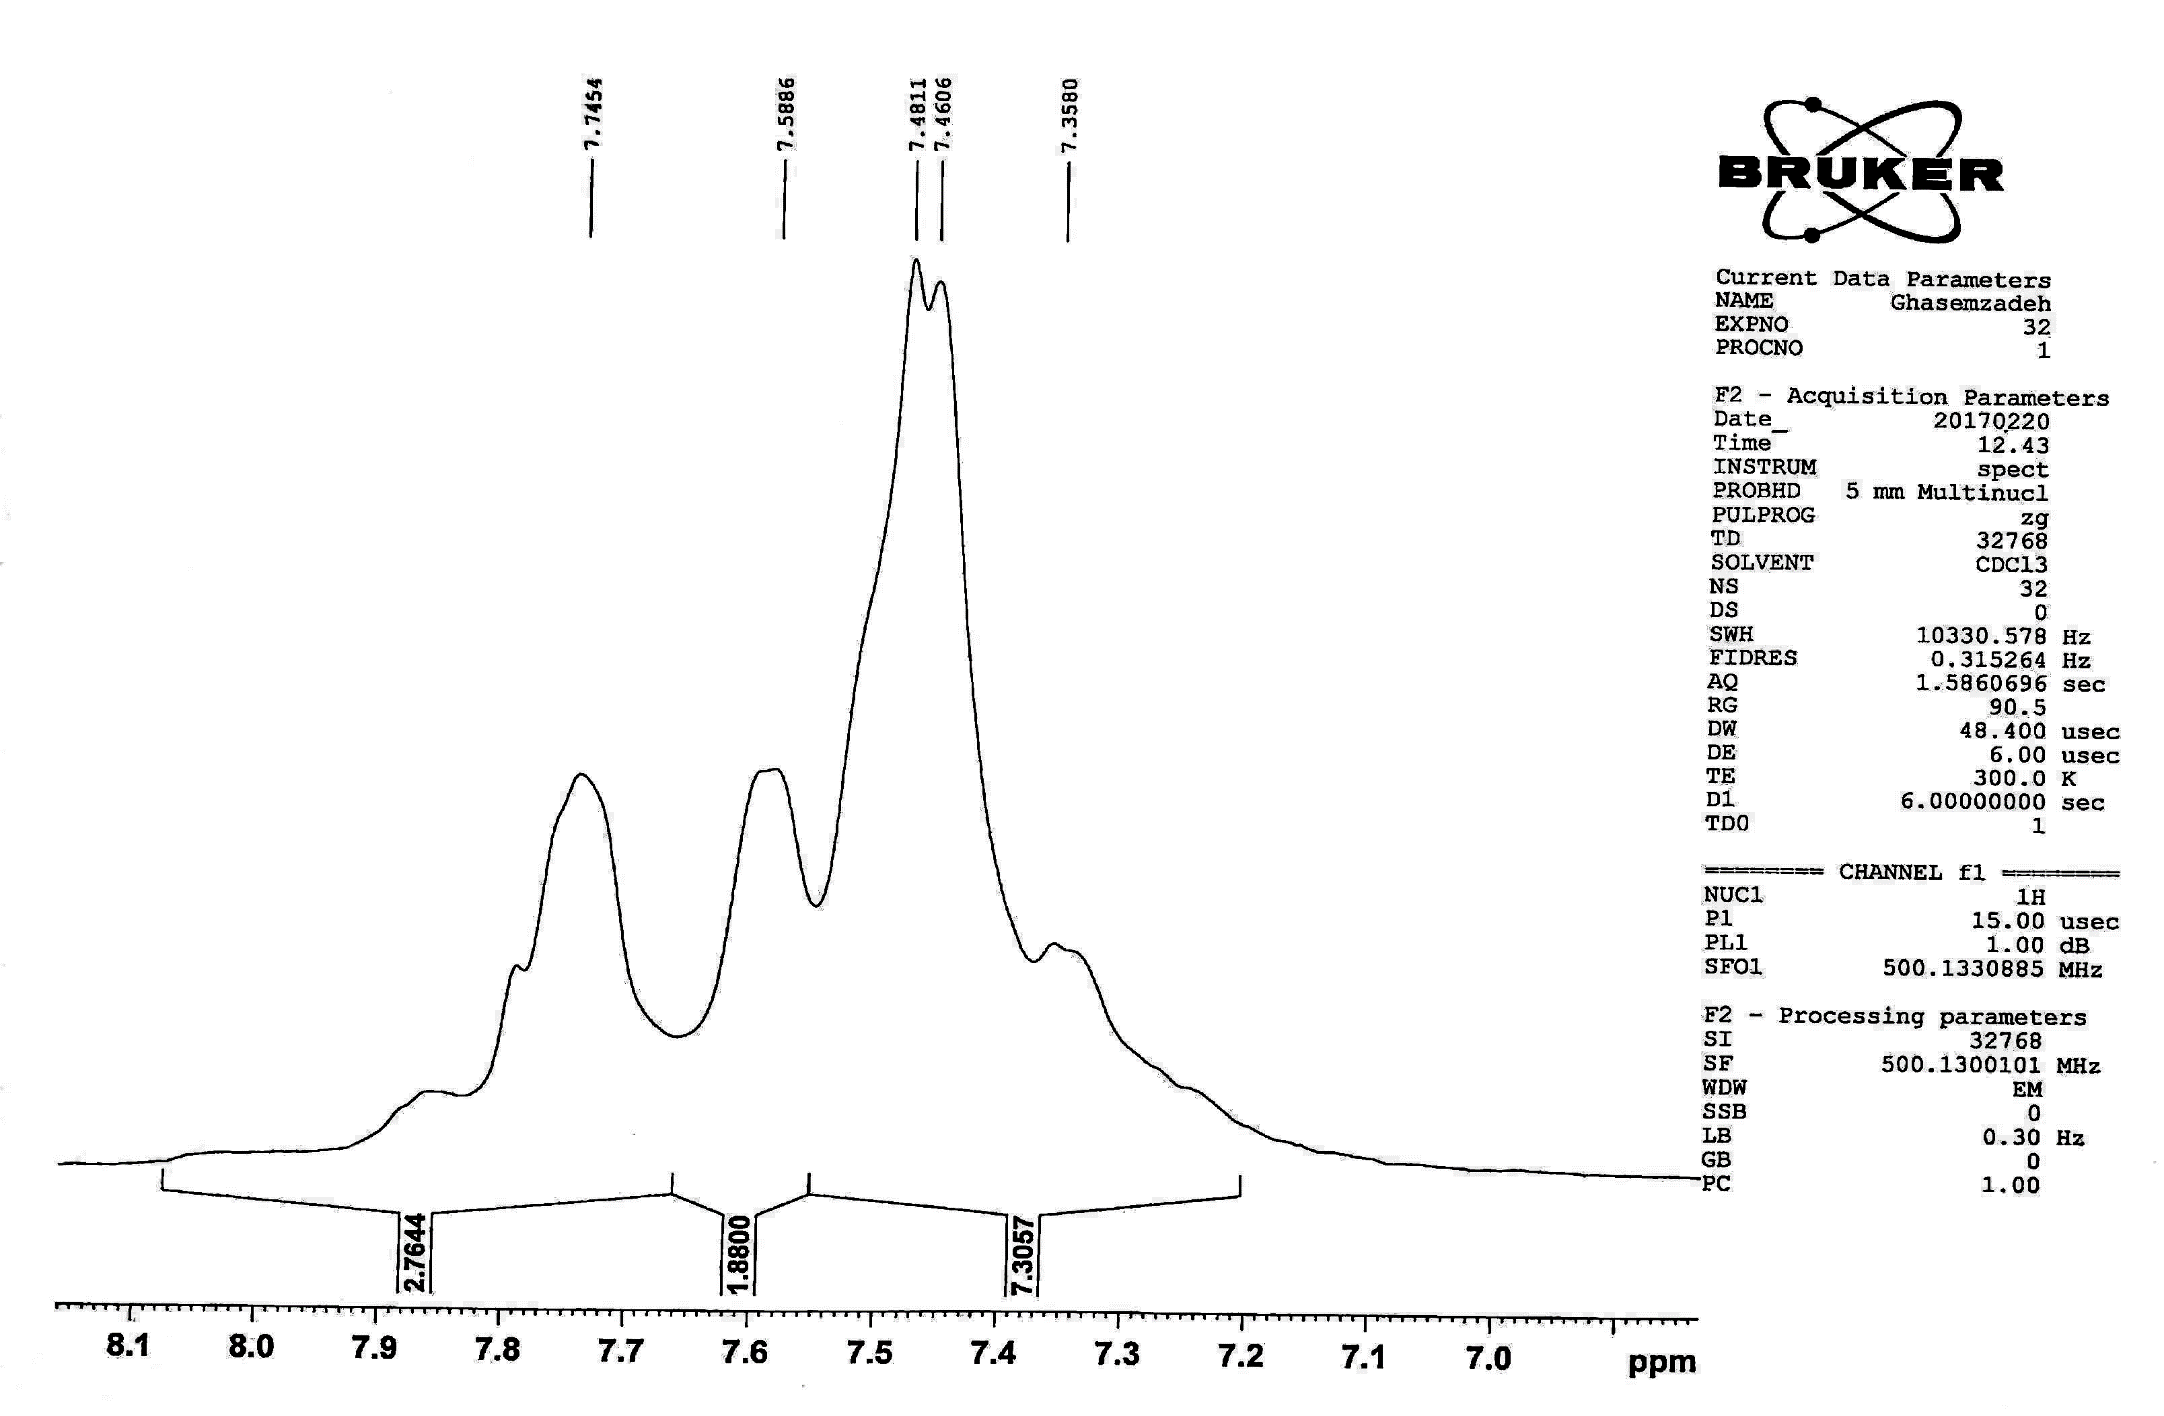


1H NMR of **5b**


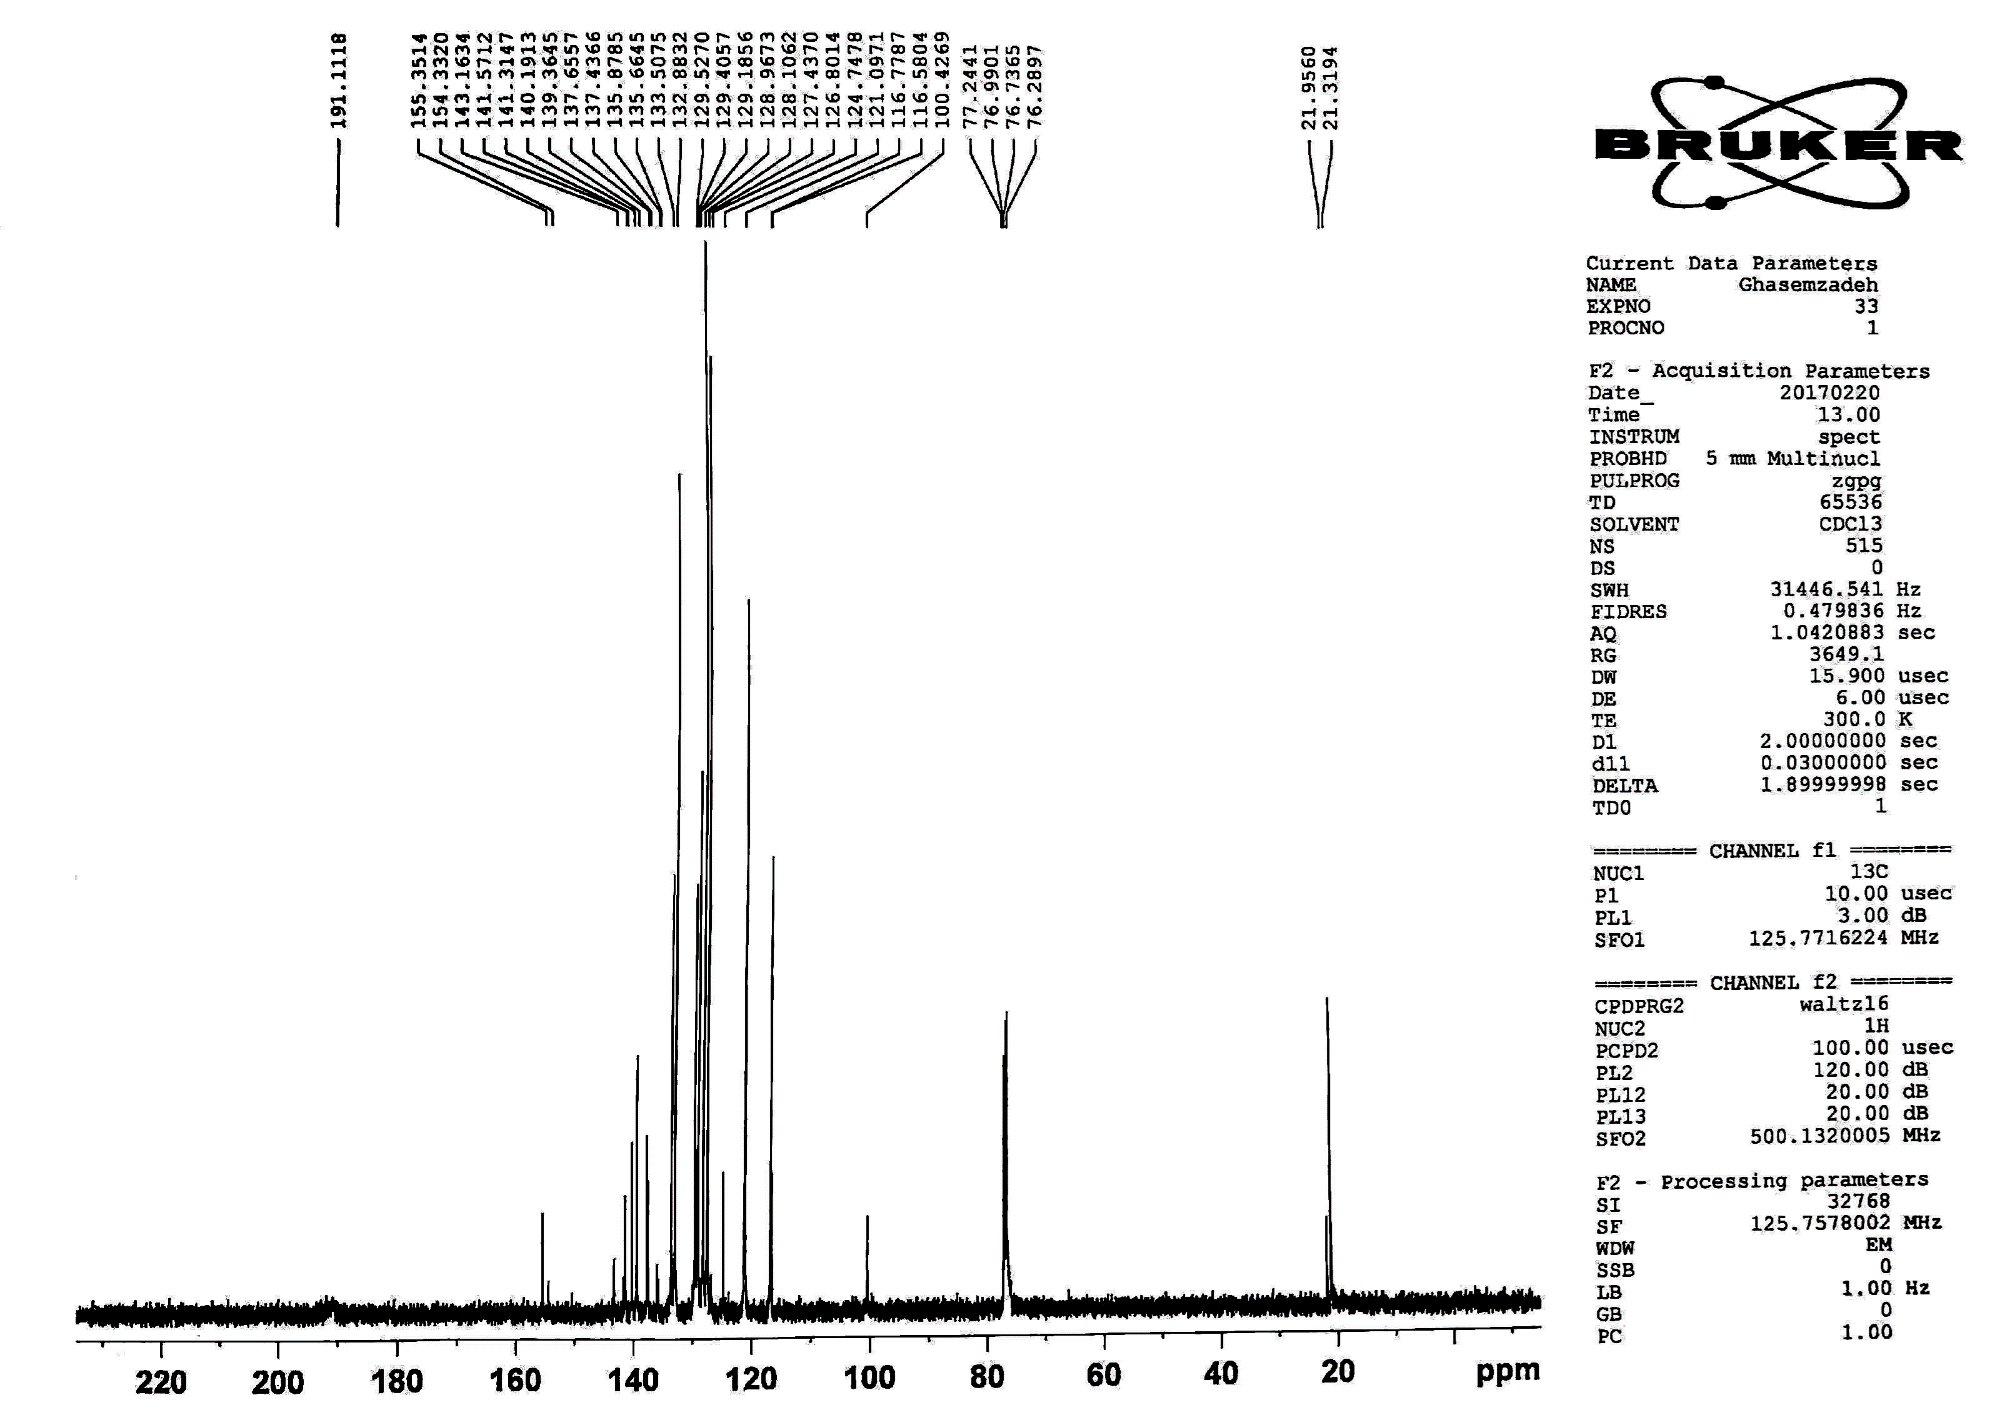


13C NMR of **5b**

**
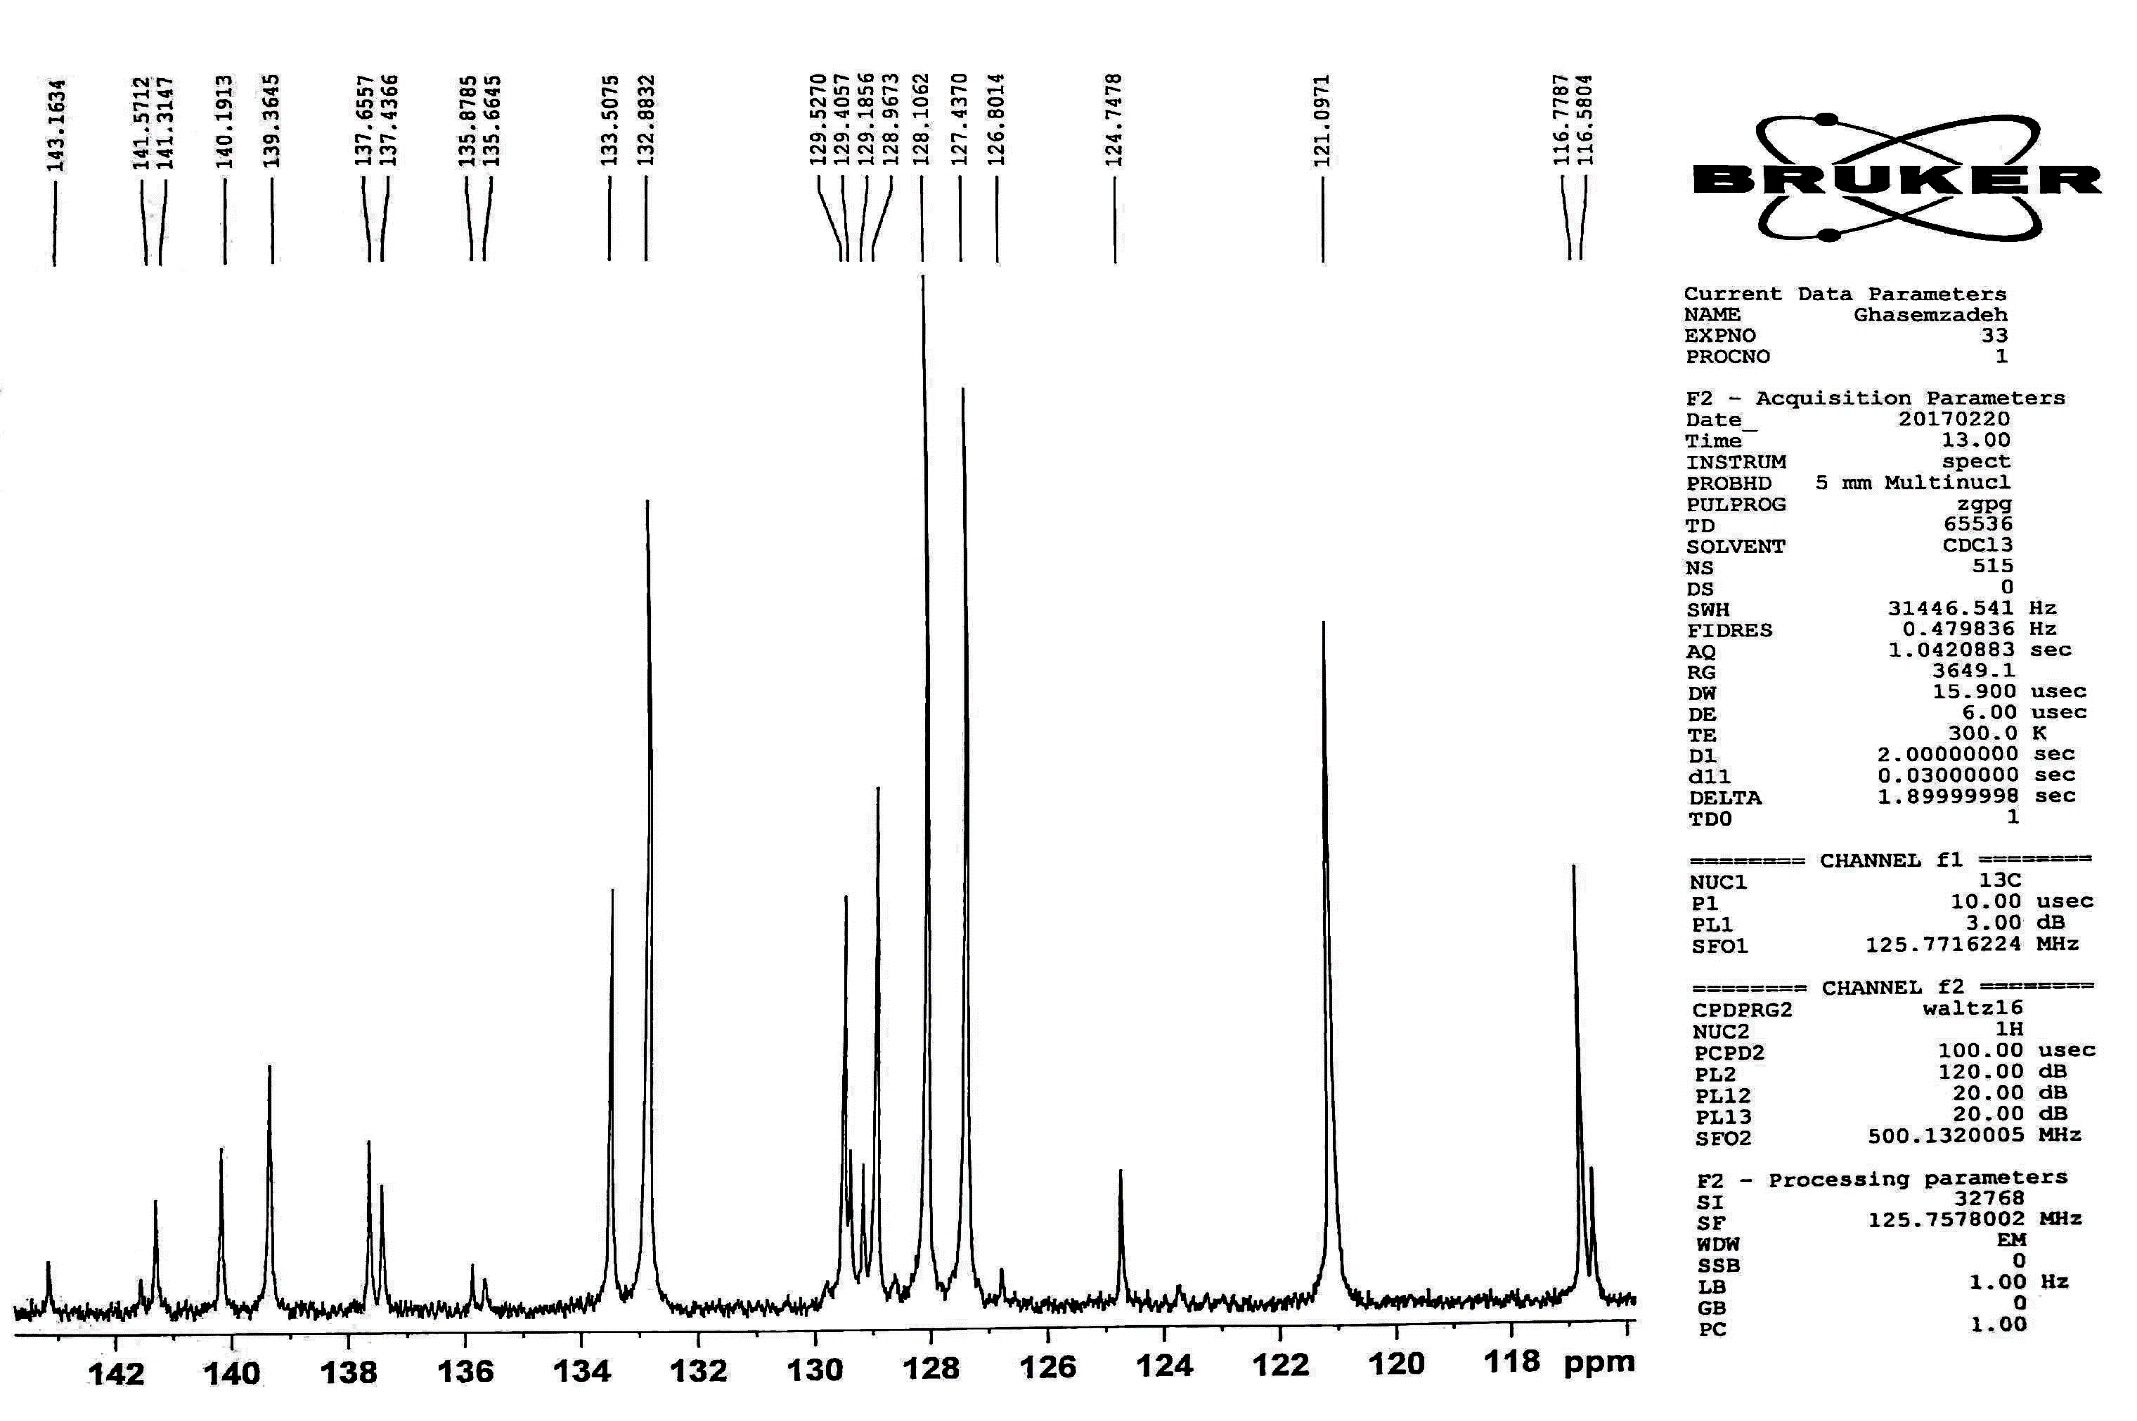
**13C NMR of **5b**

Mass spectrum of **5b**


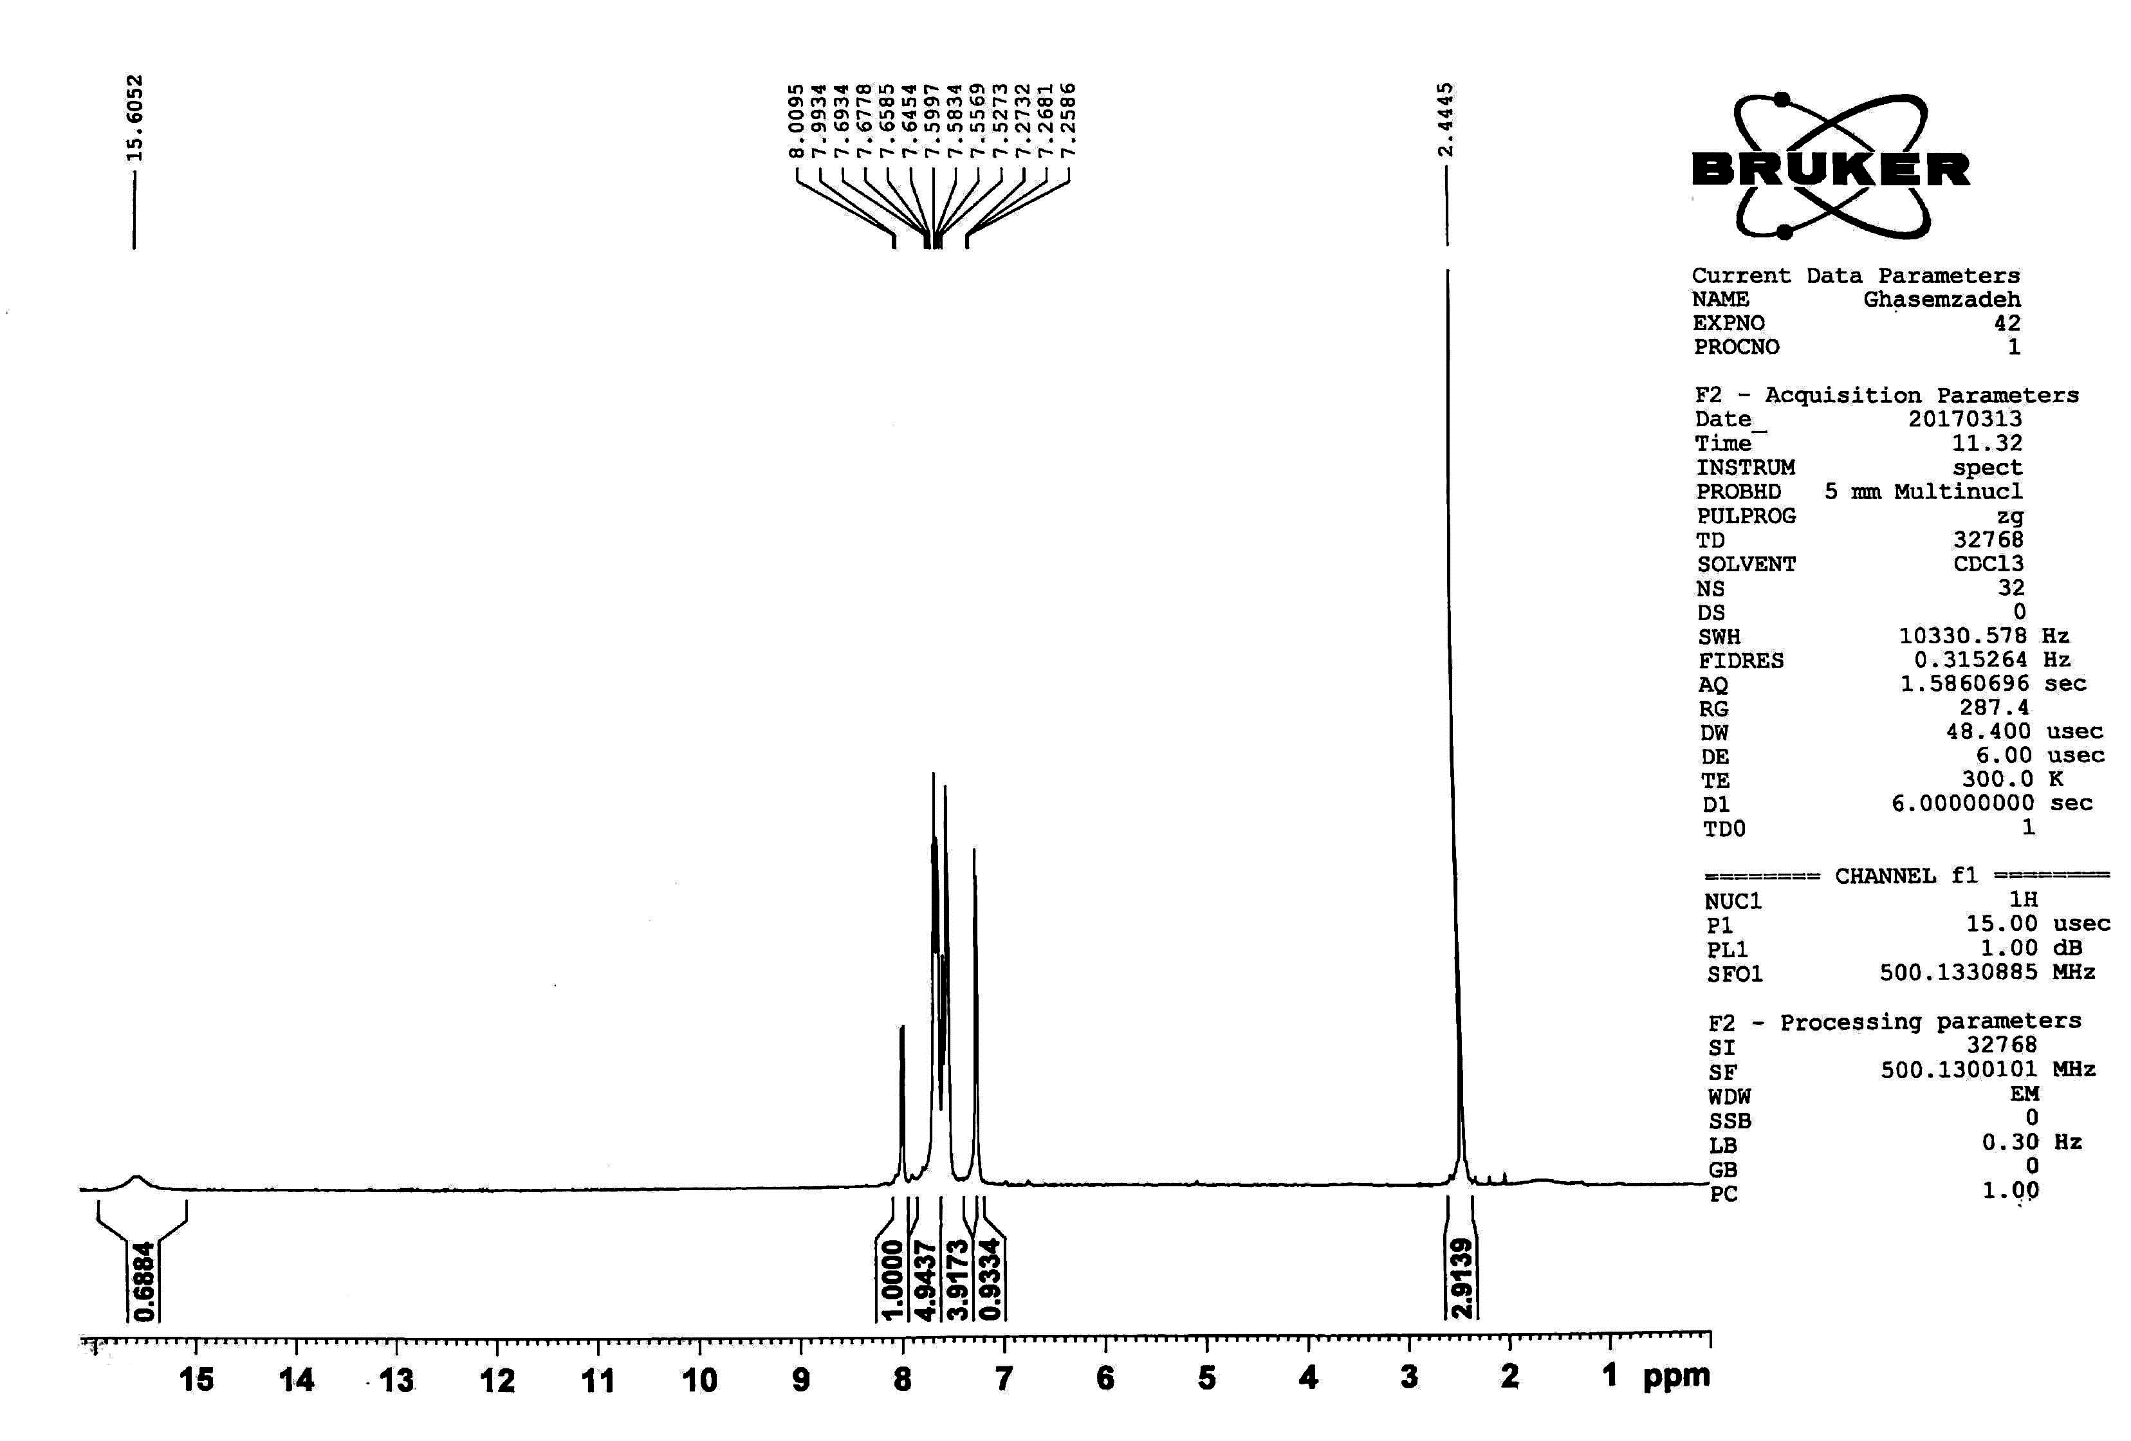


1H NMR of **5c**


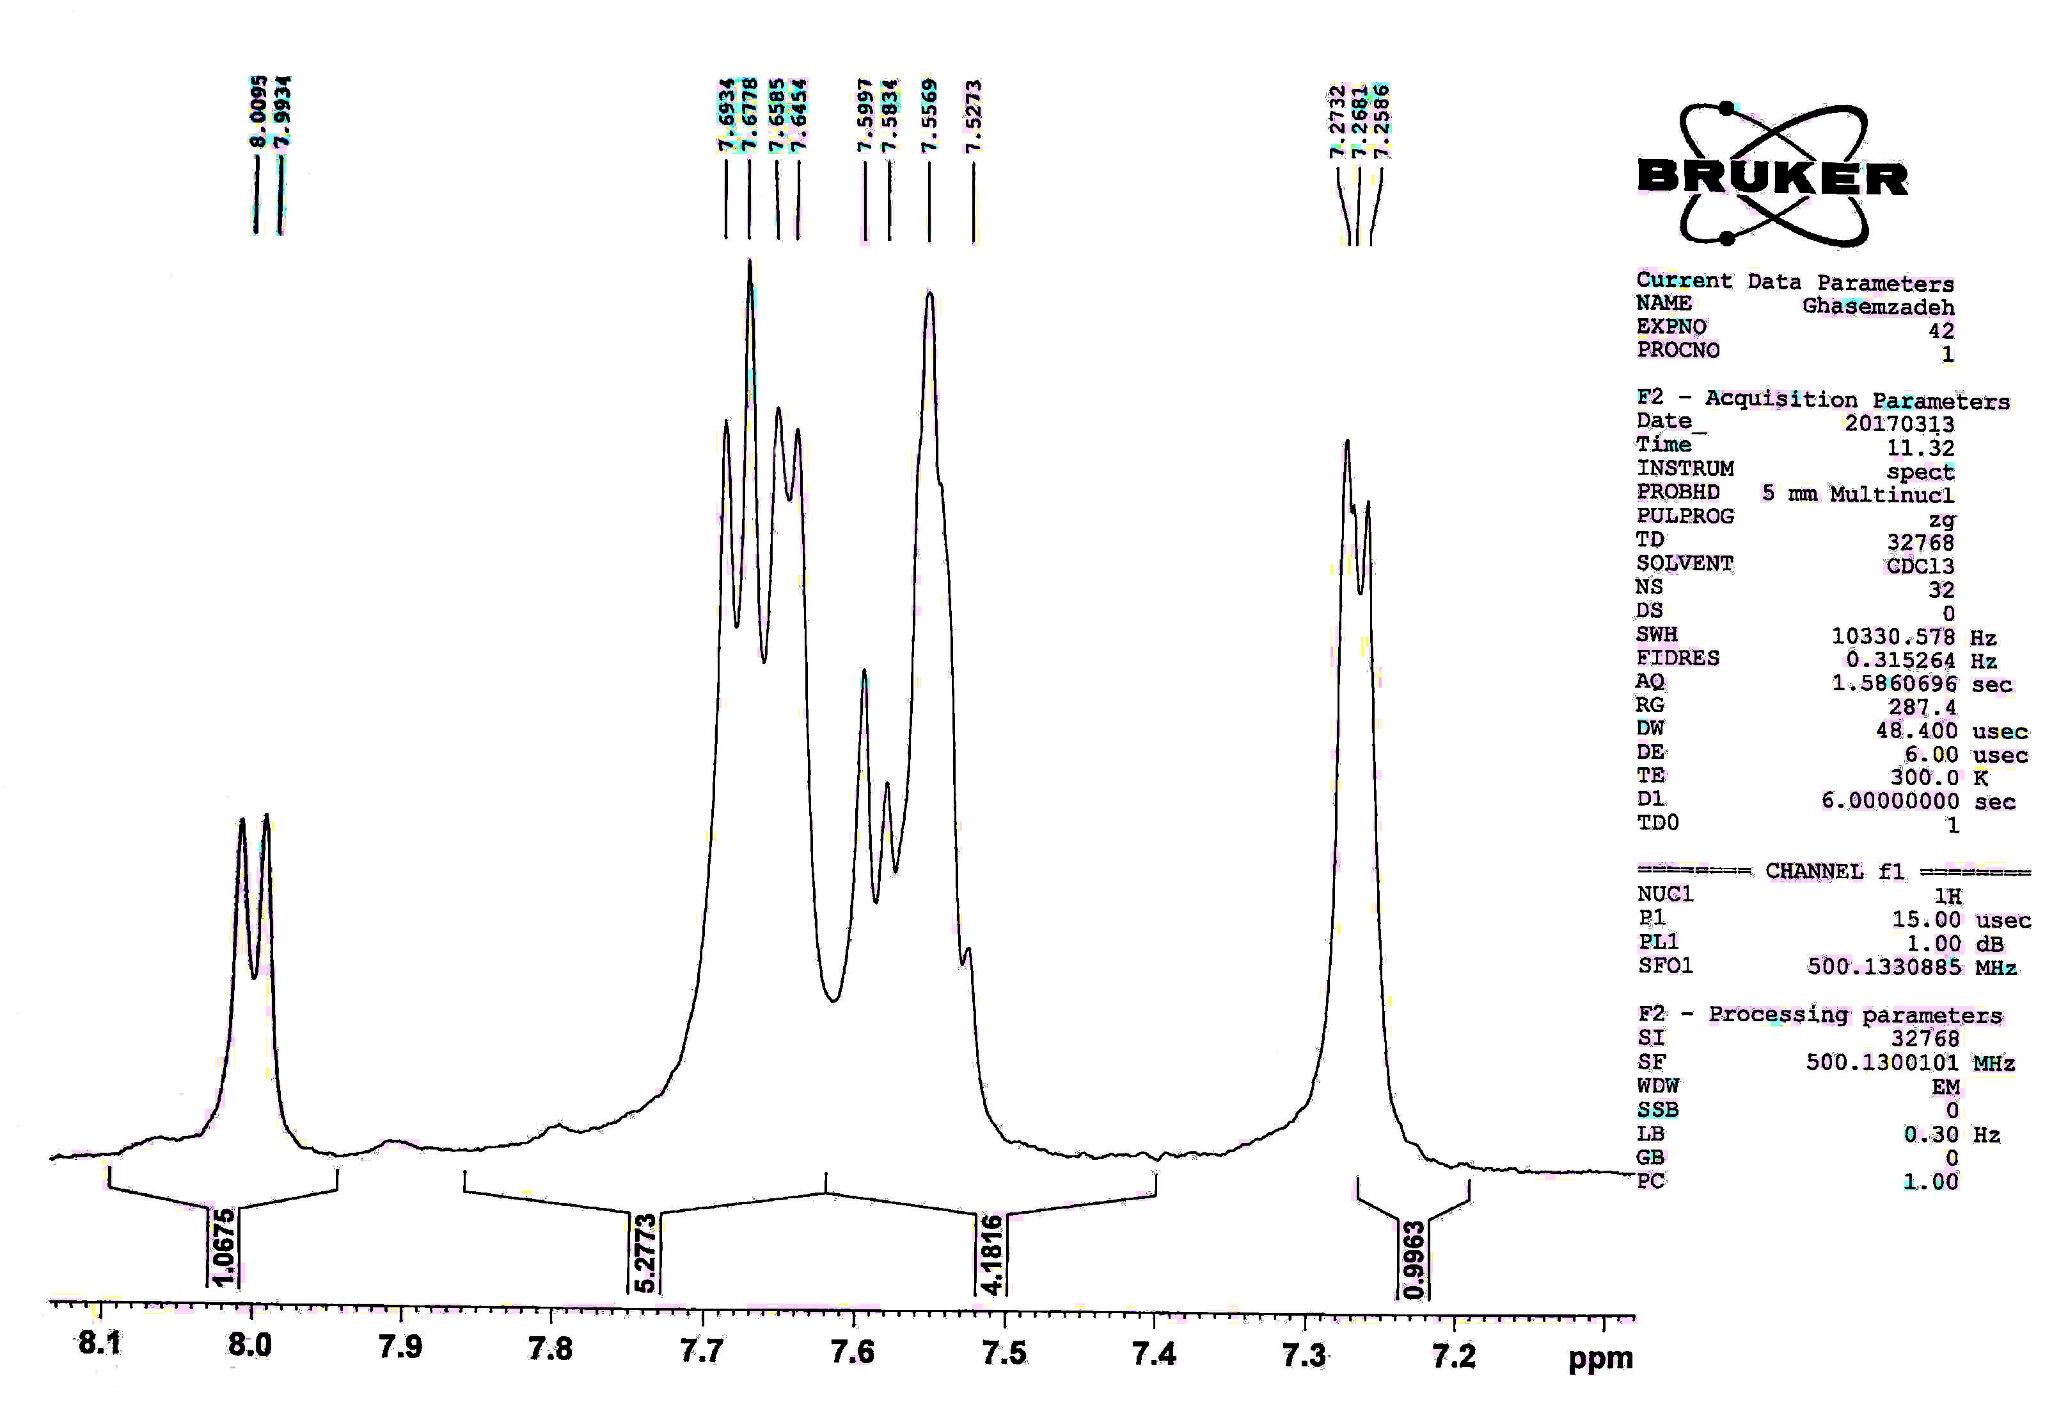


1H NMR of **5c**


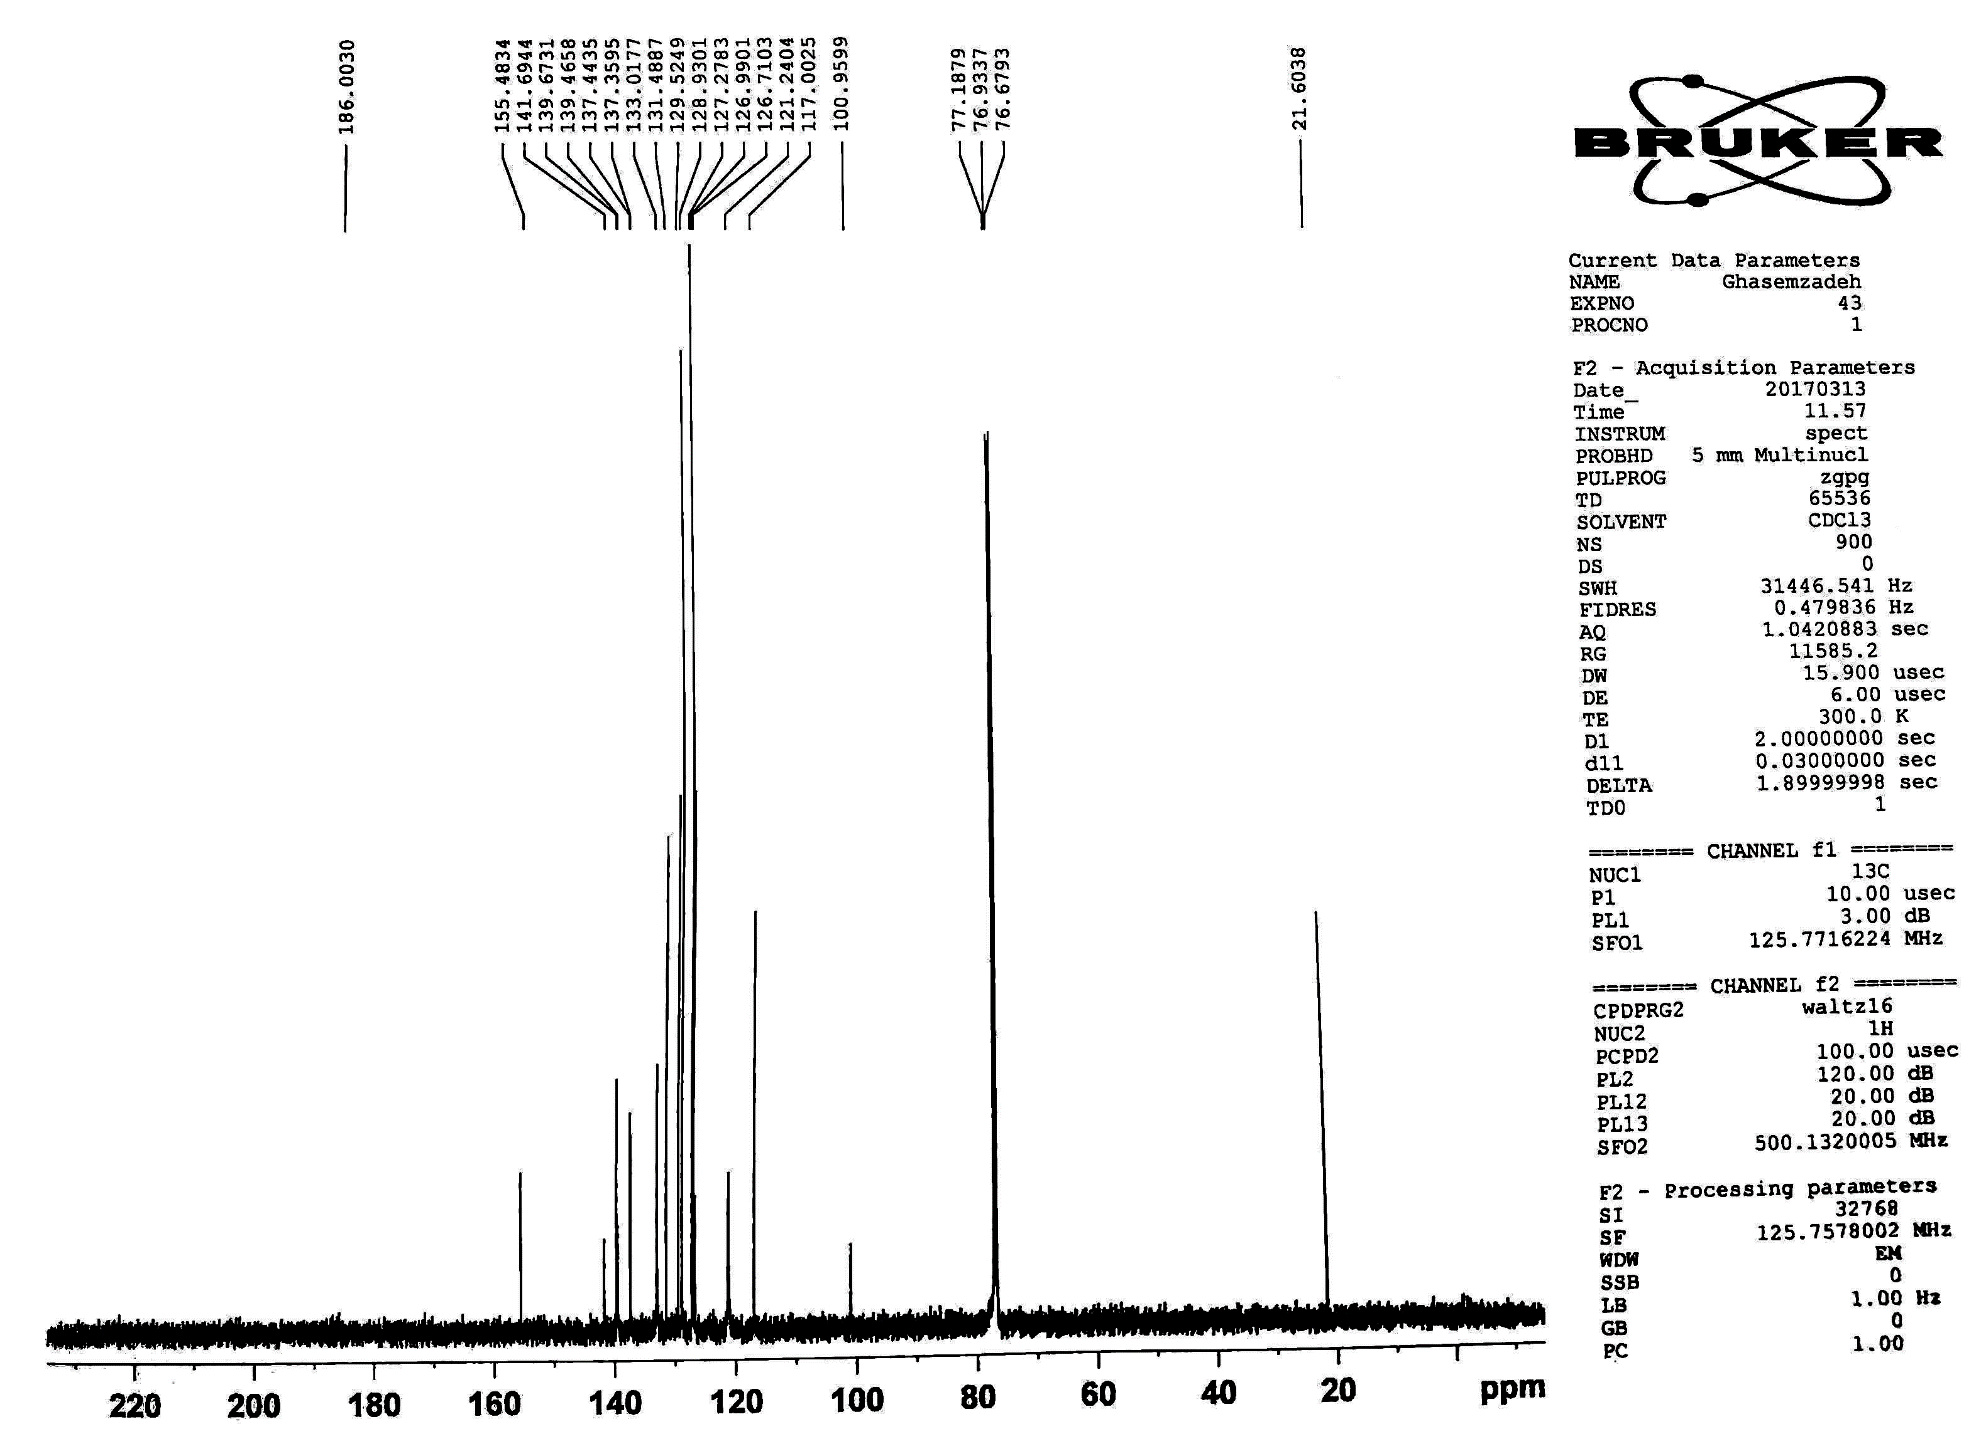


13C NMR of **5c**

Mass spectrum of **5c**


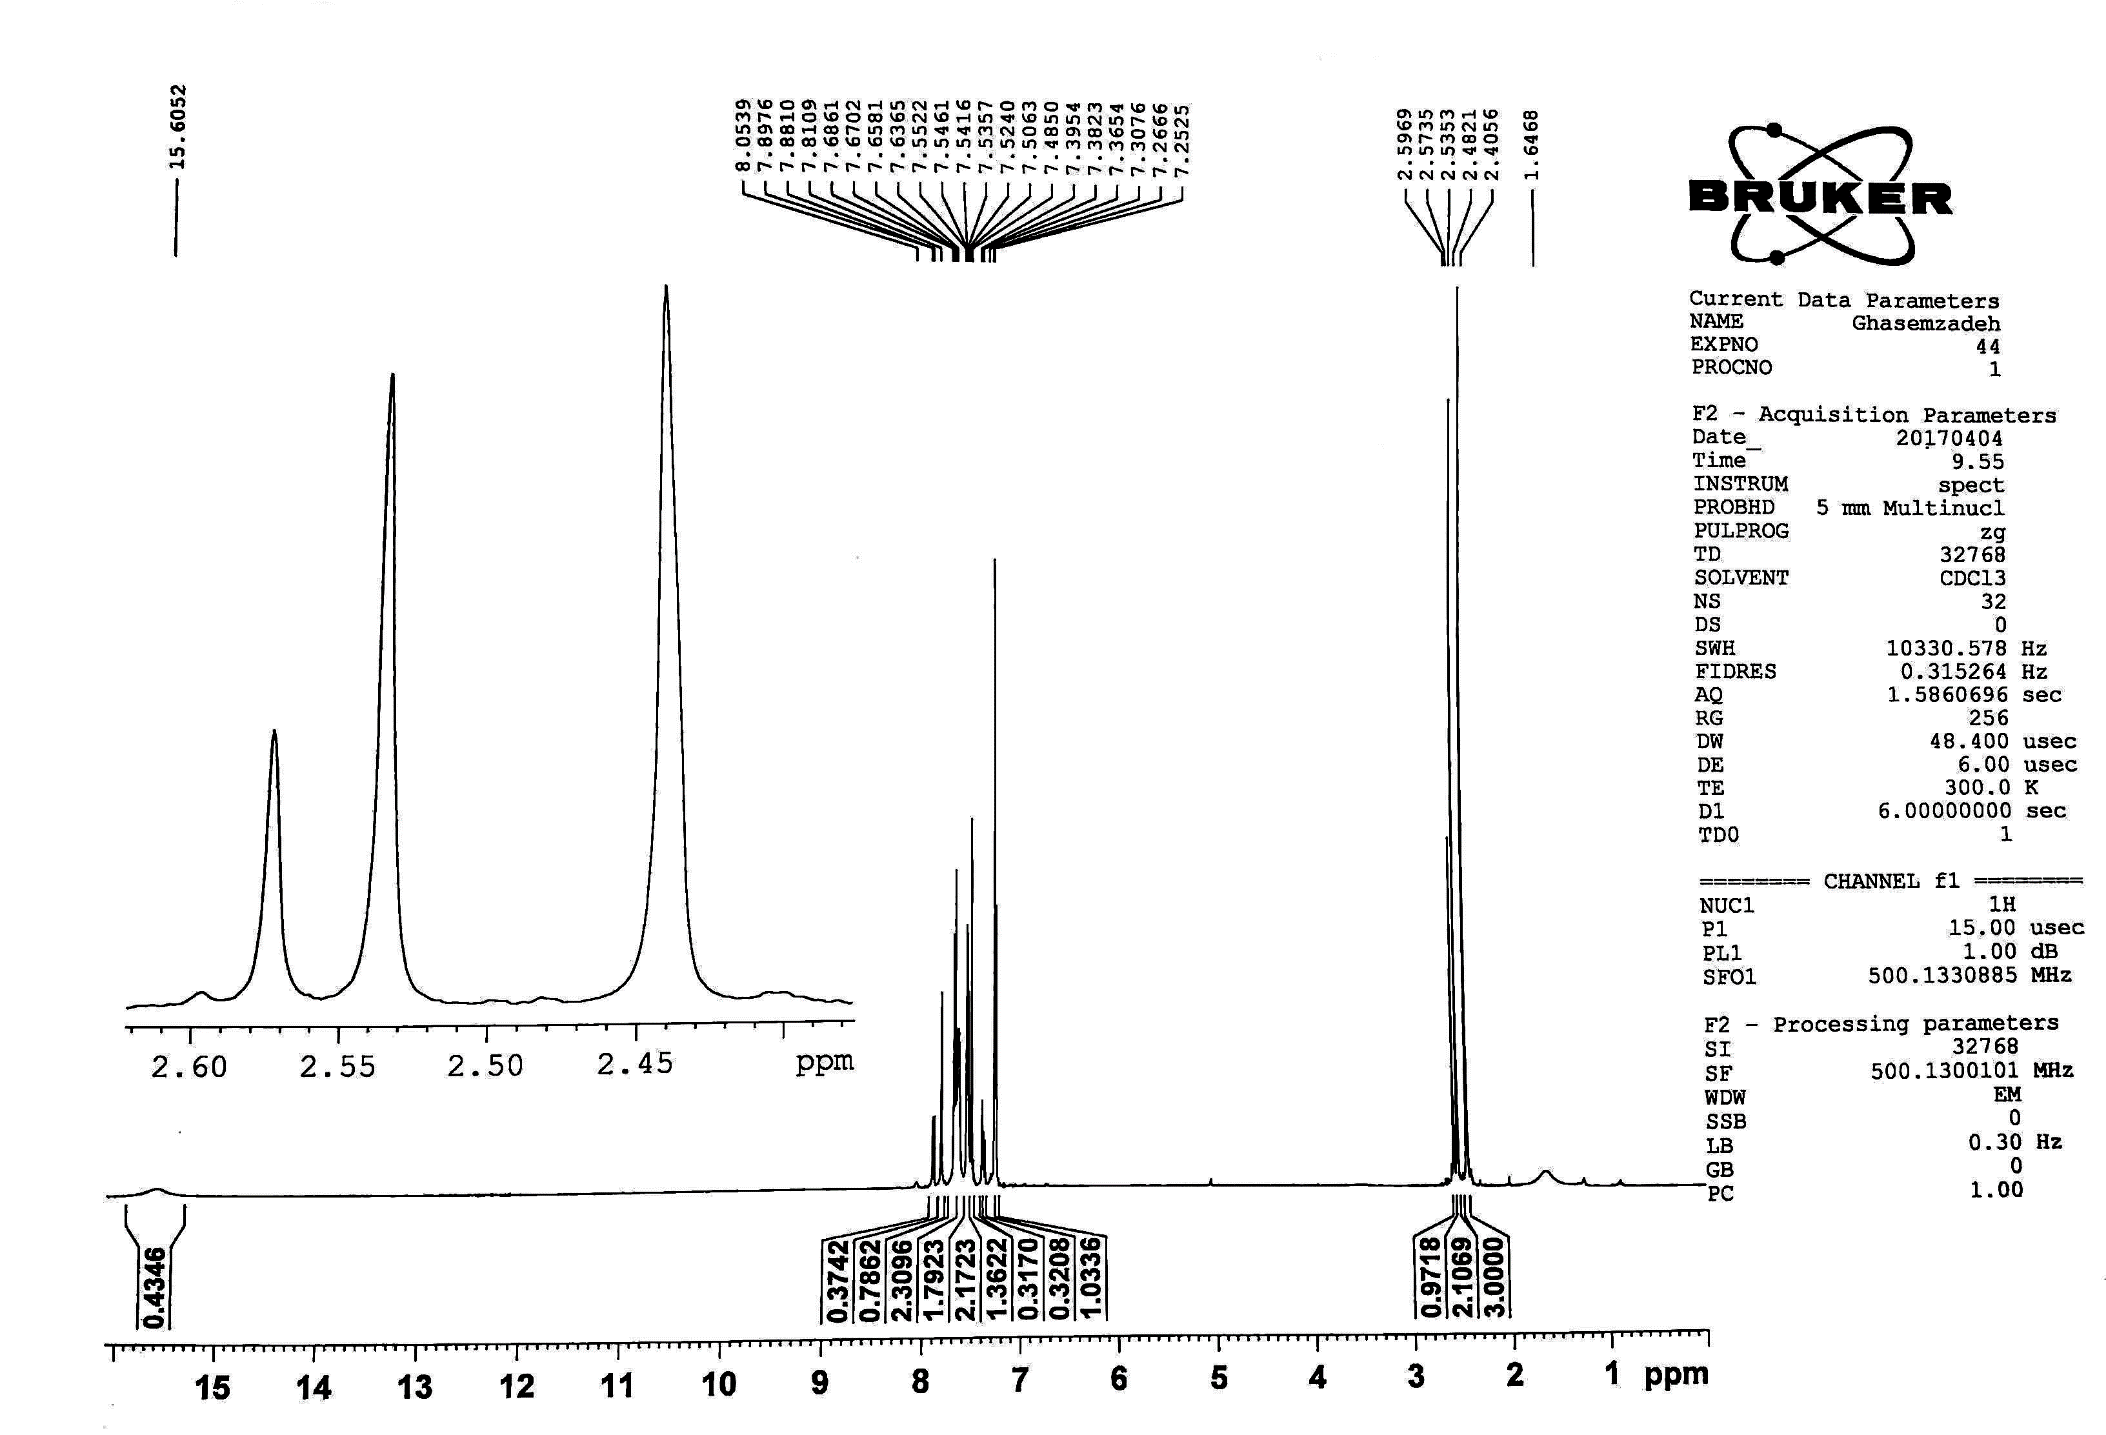


1H NMR of **5d**


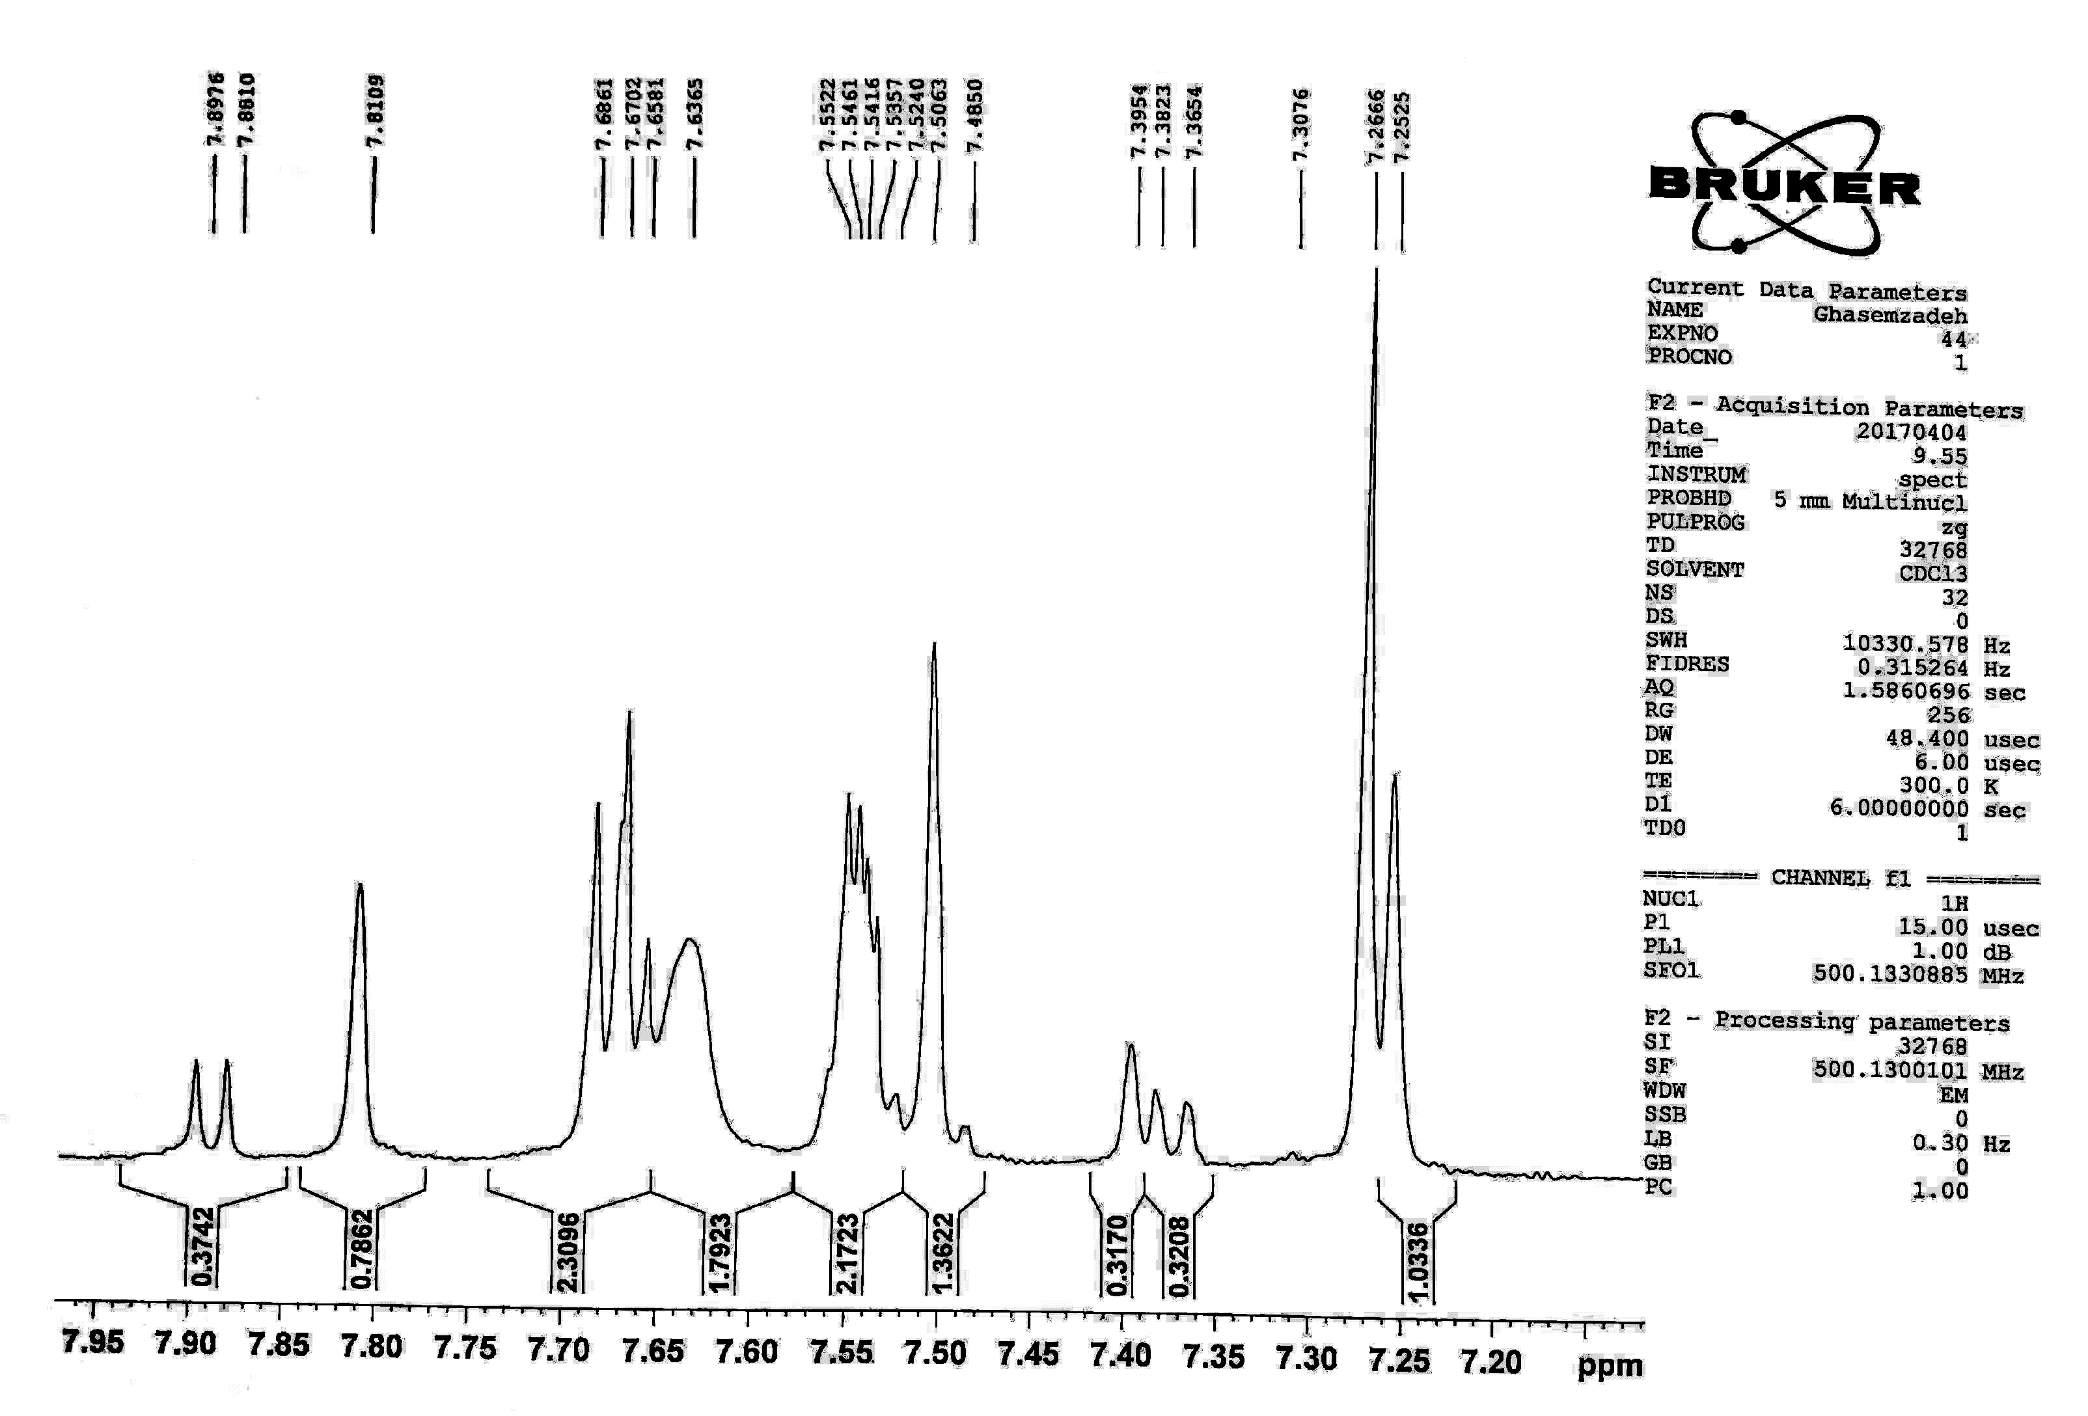


1H NMR of **5d**


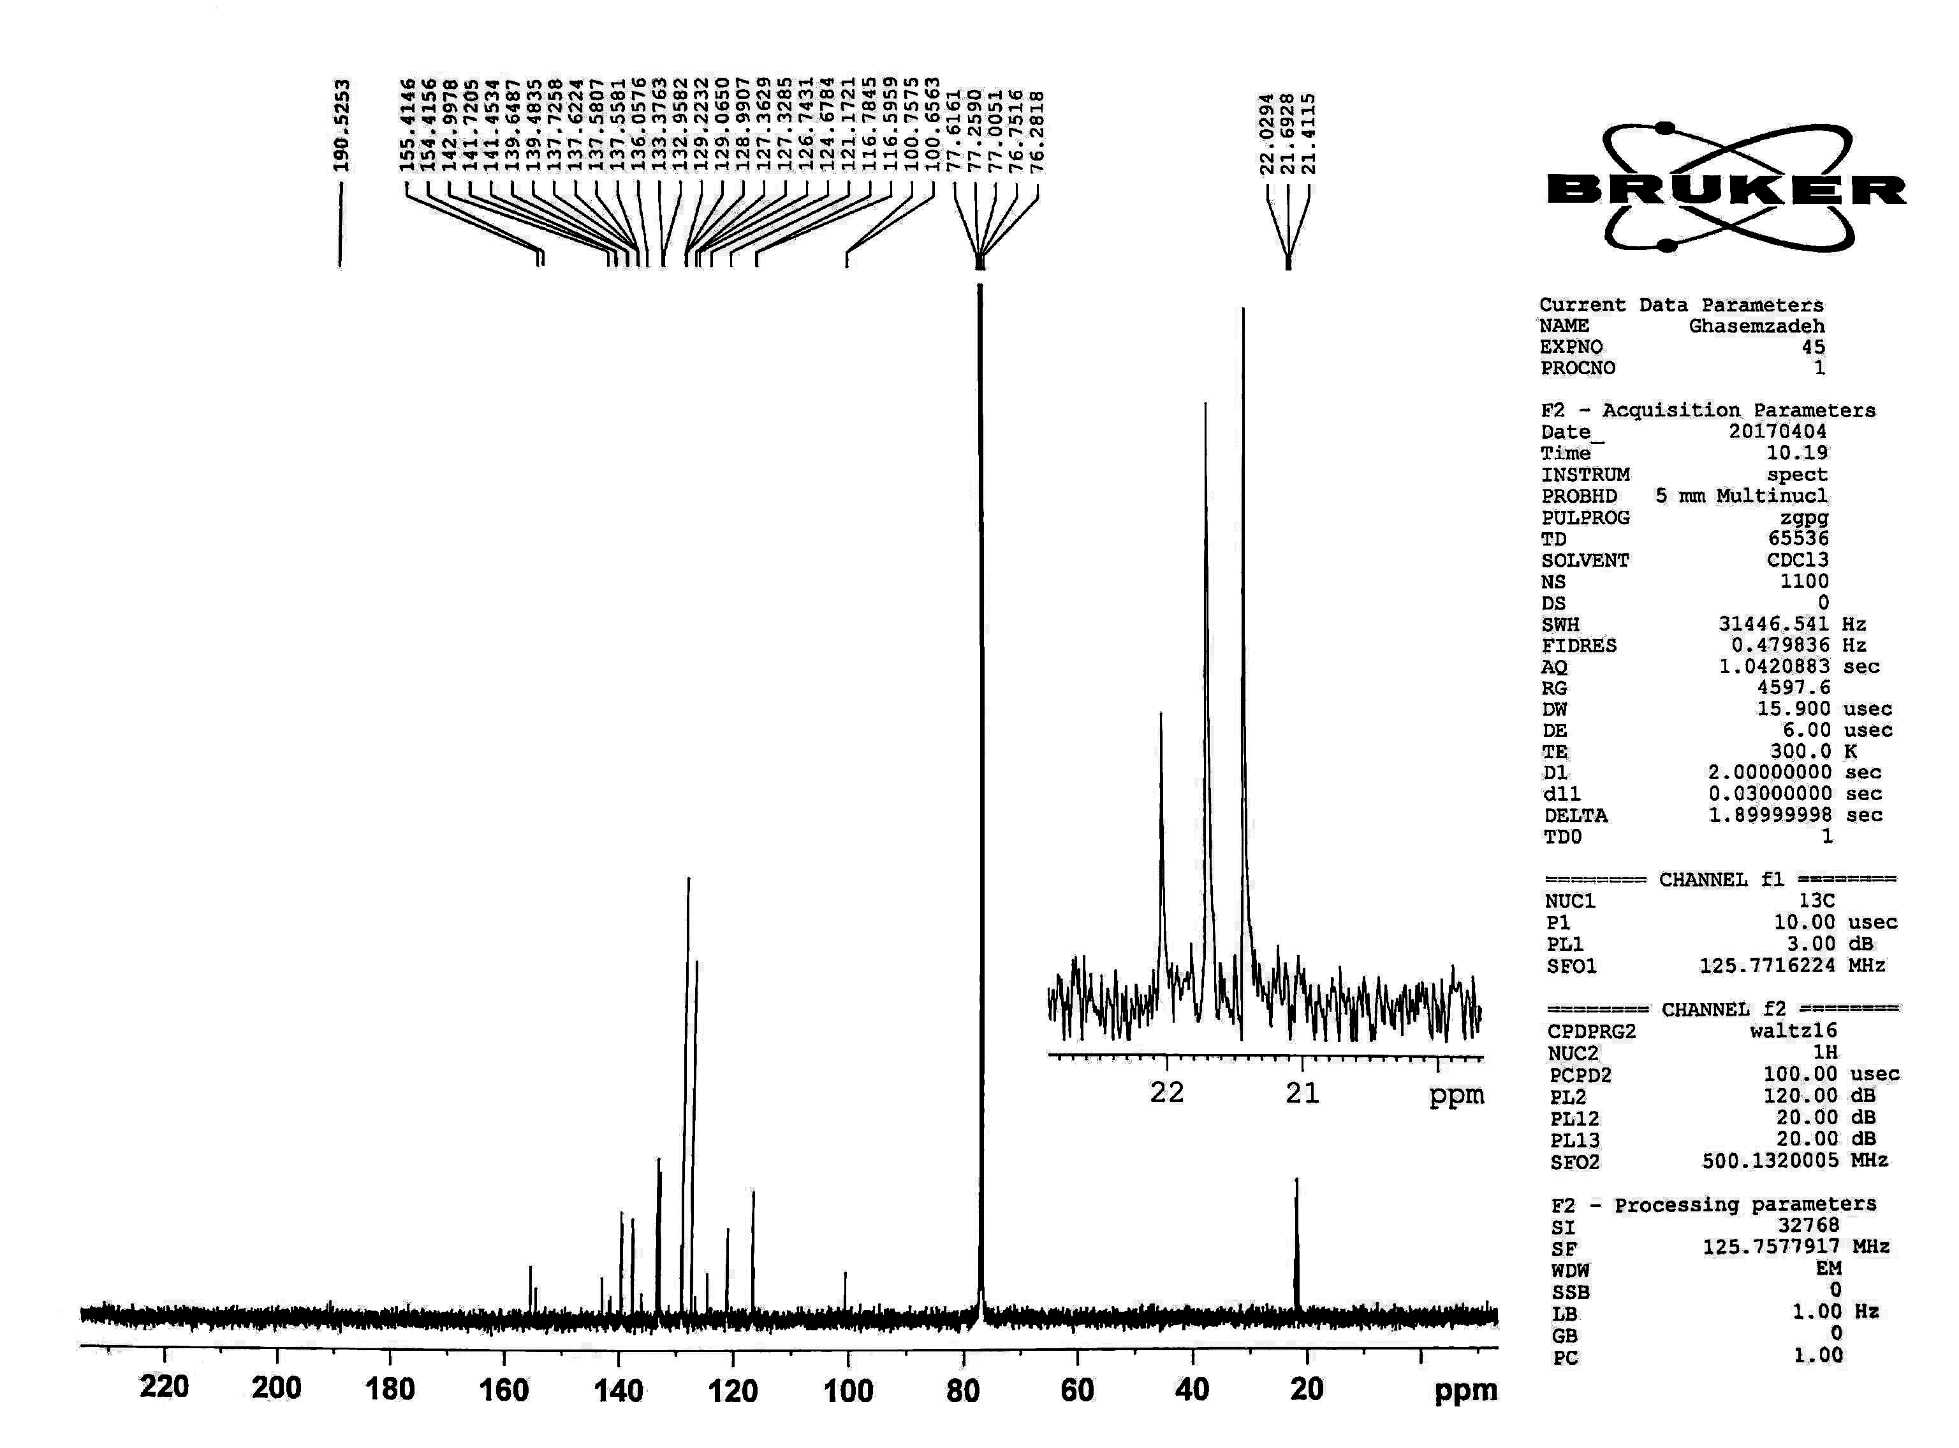


13C NMR of **5d**


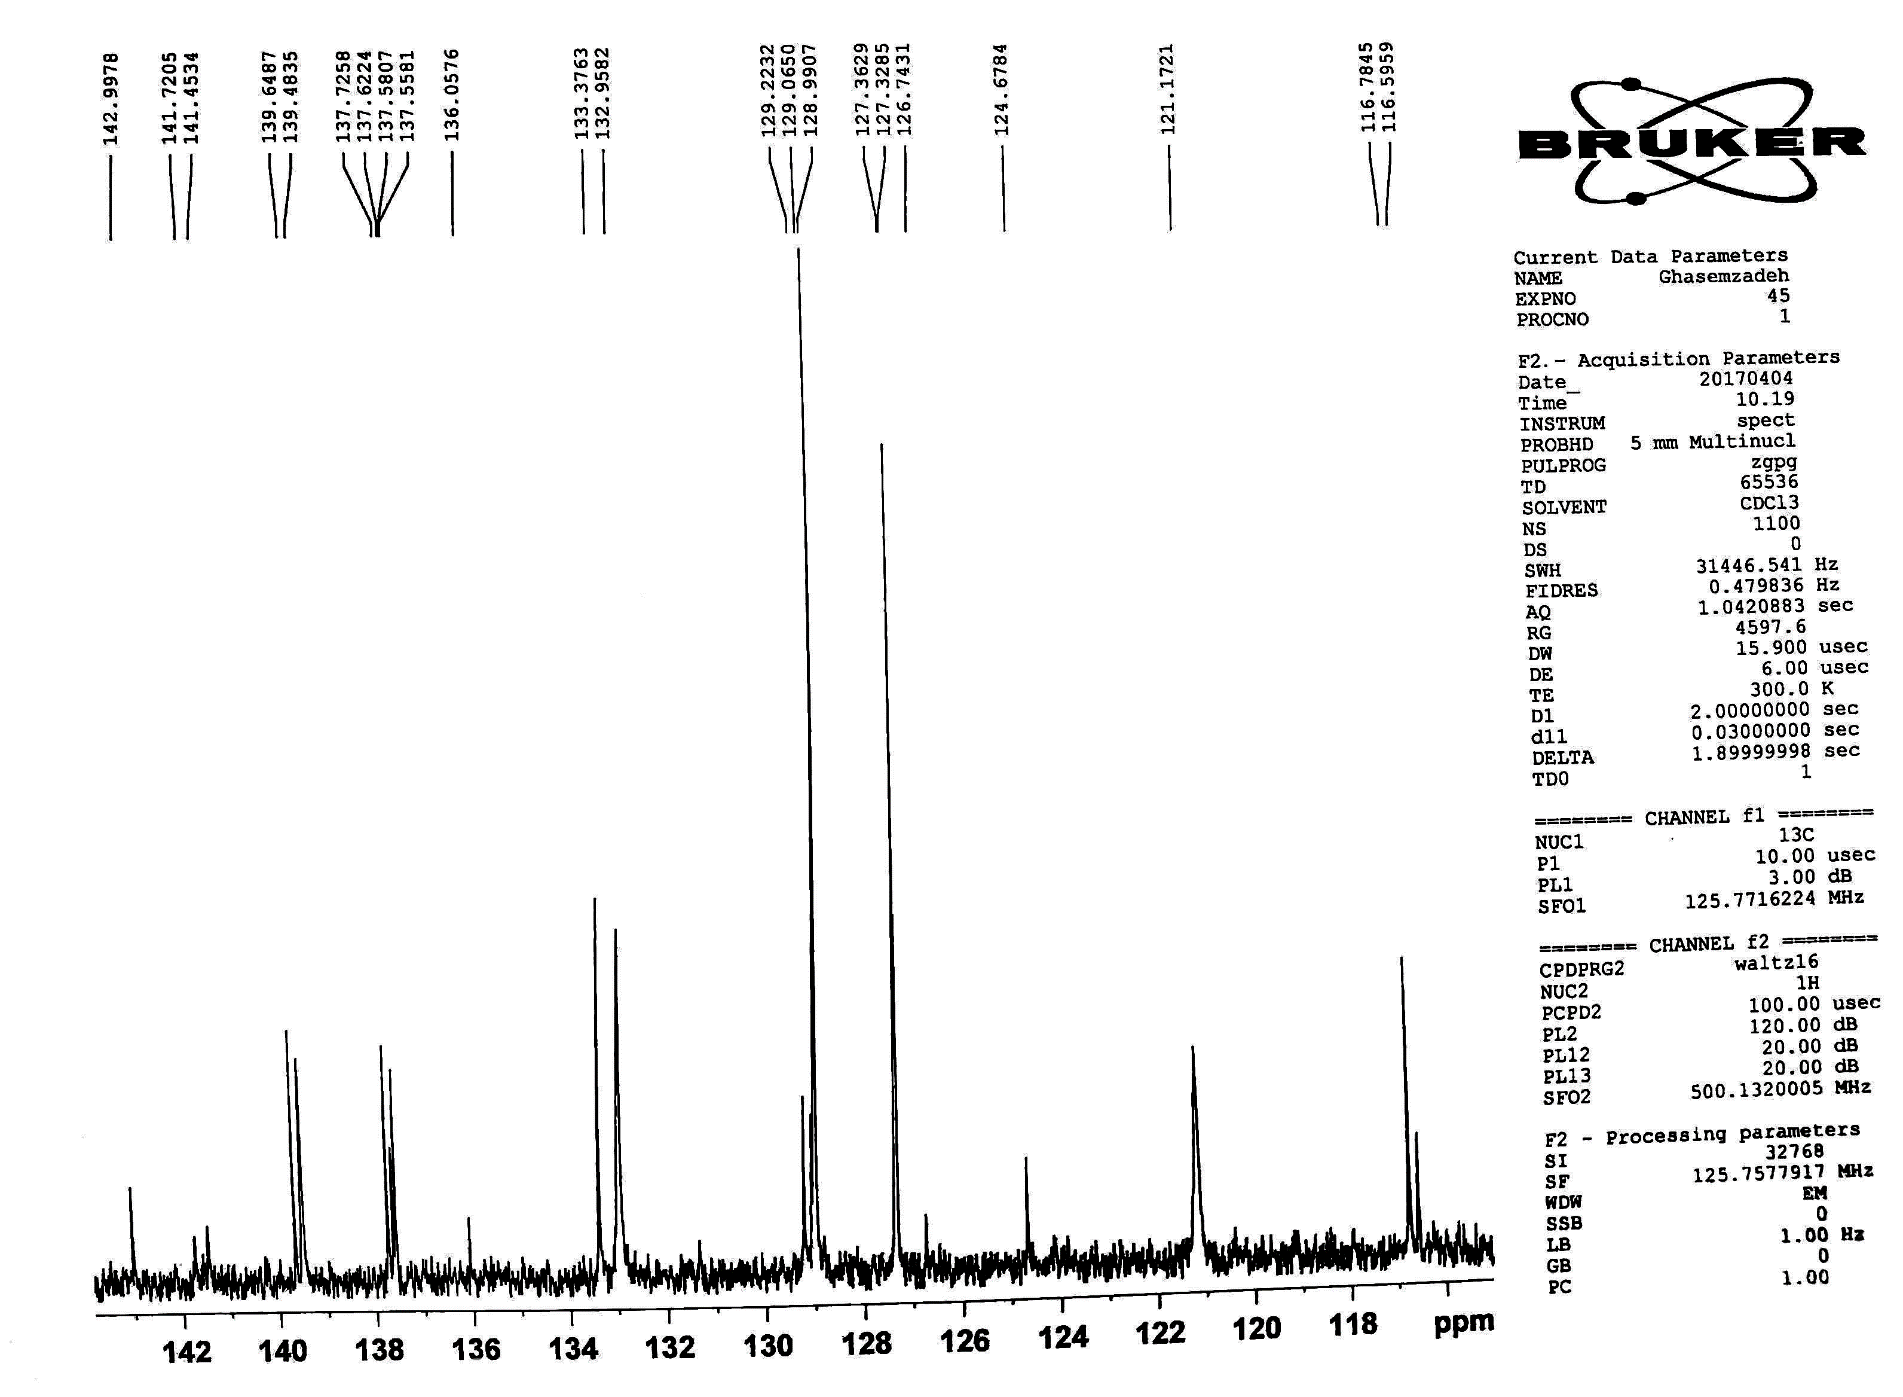


13C NMR of **5d**

Mass spectrum of **5d**


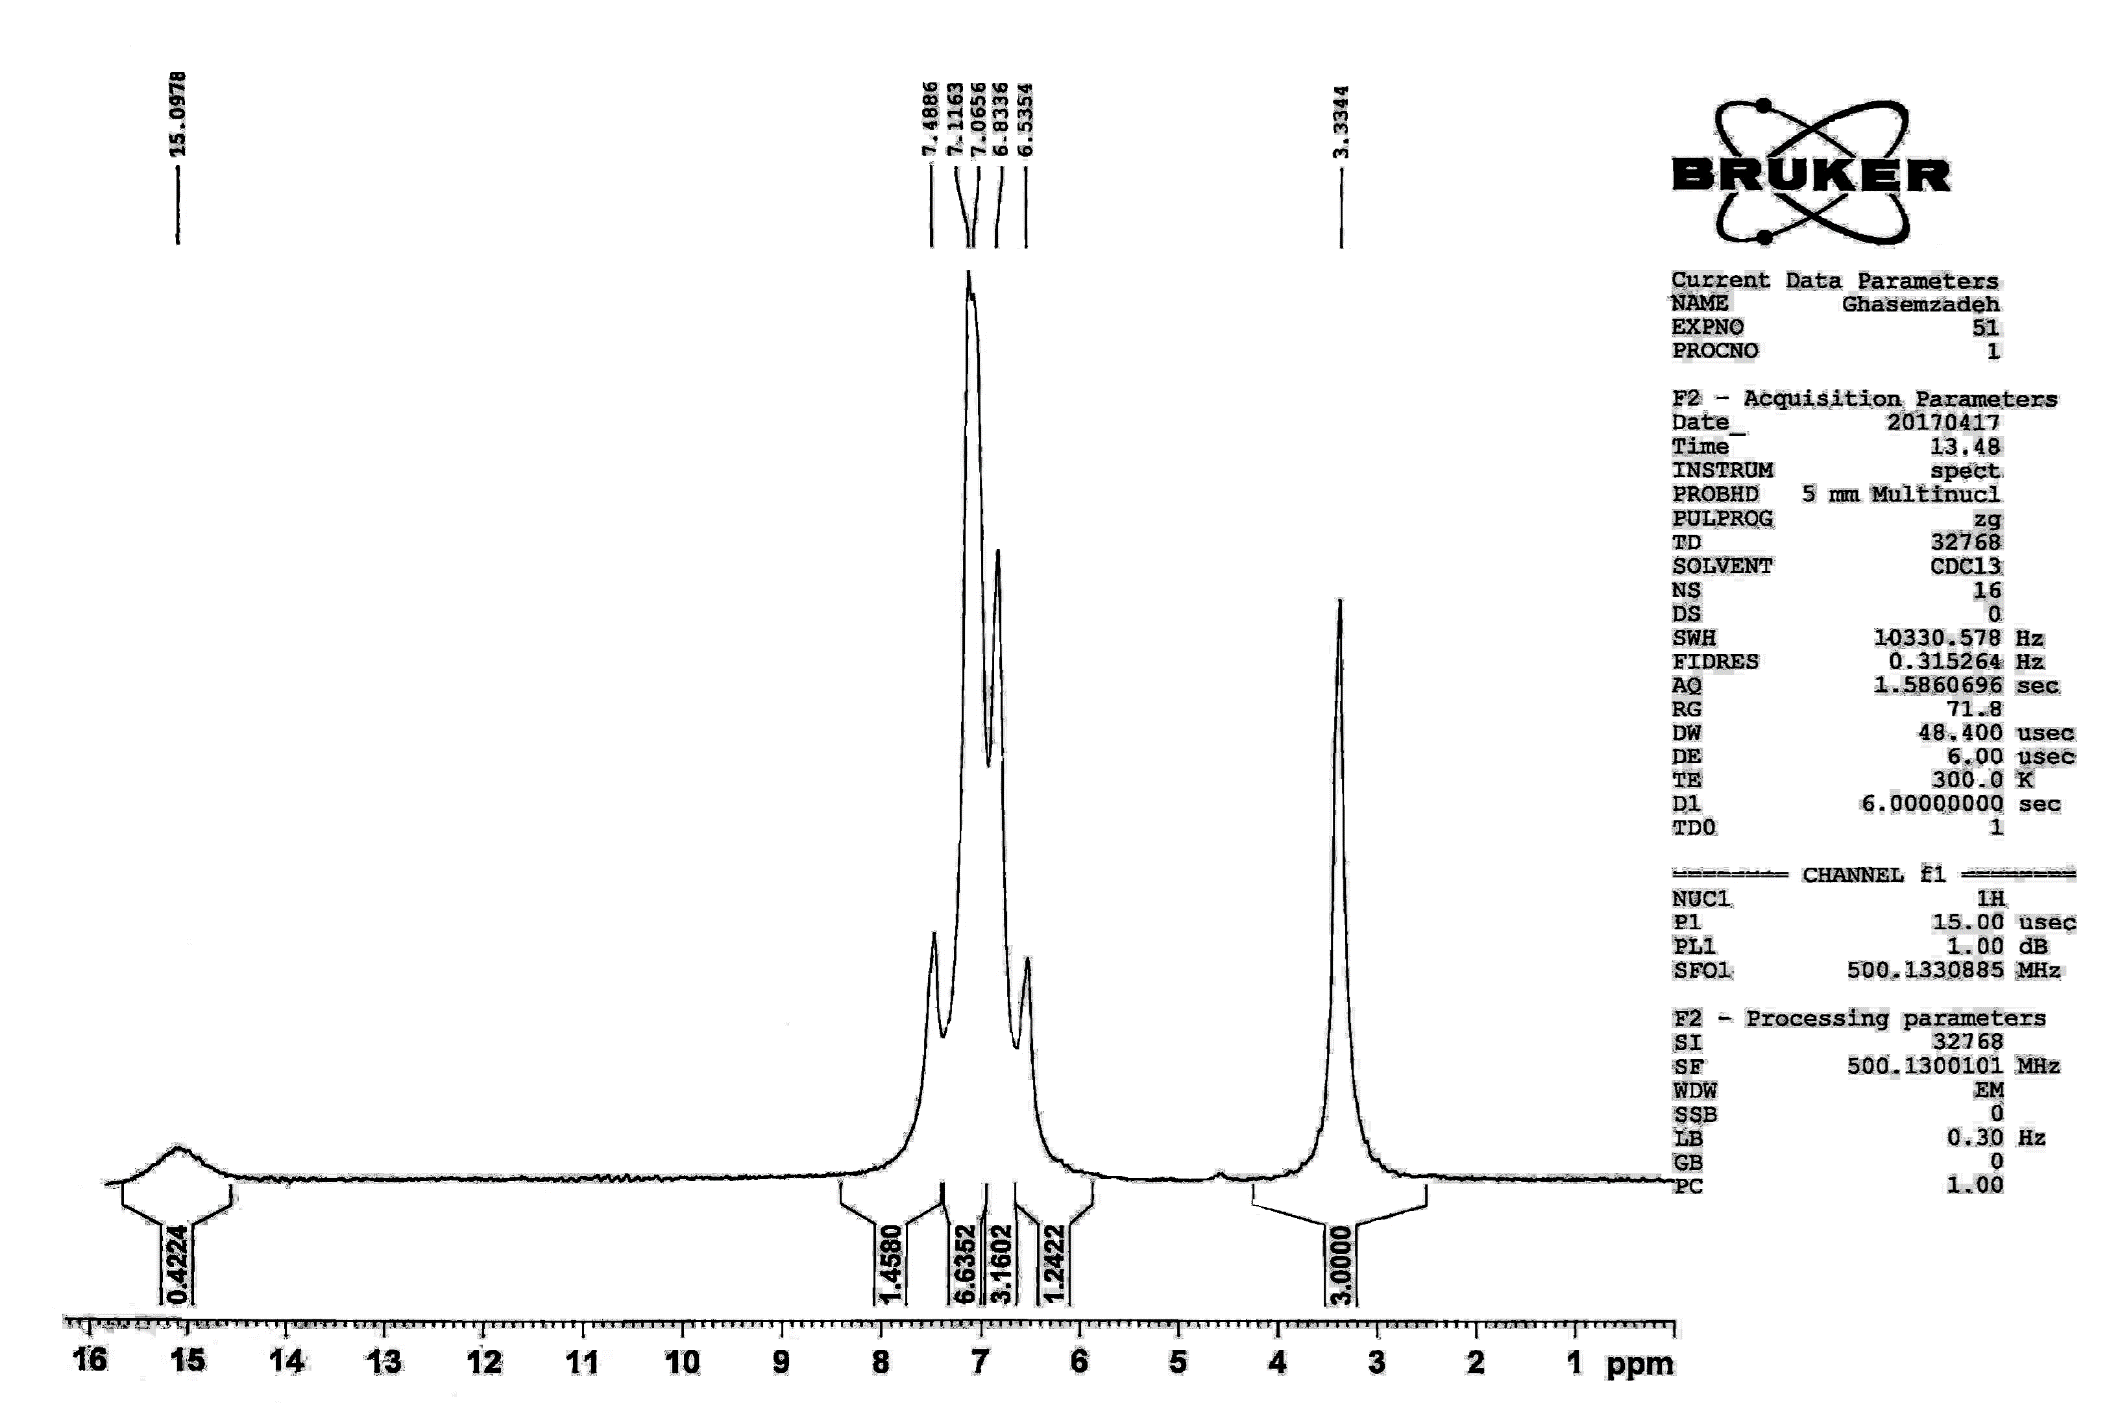


1H NMR of **5e**


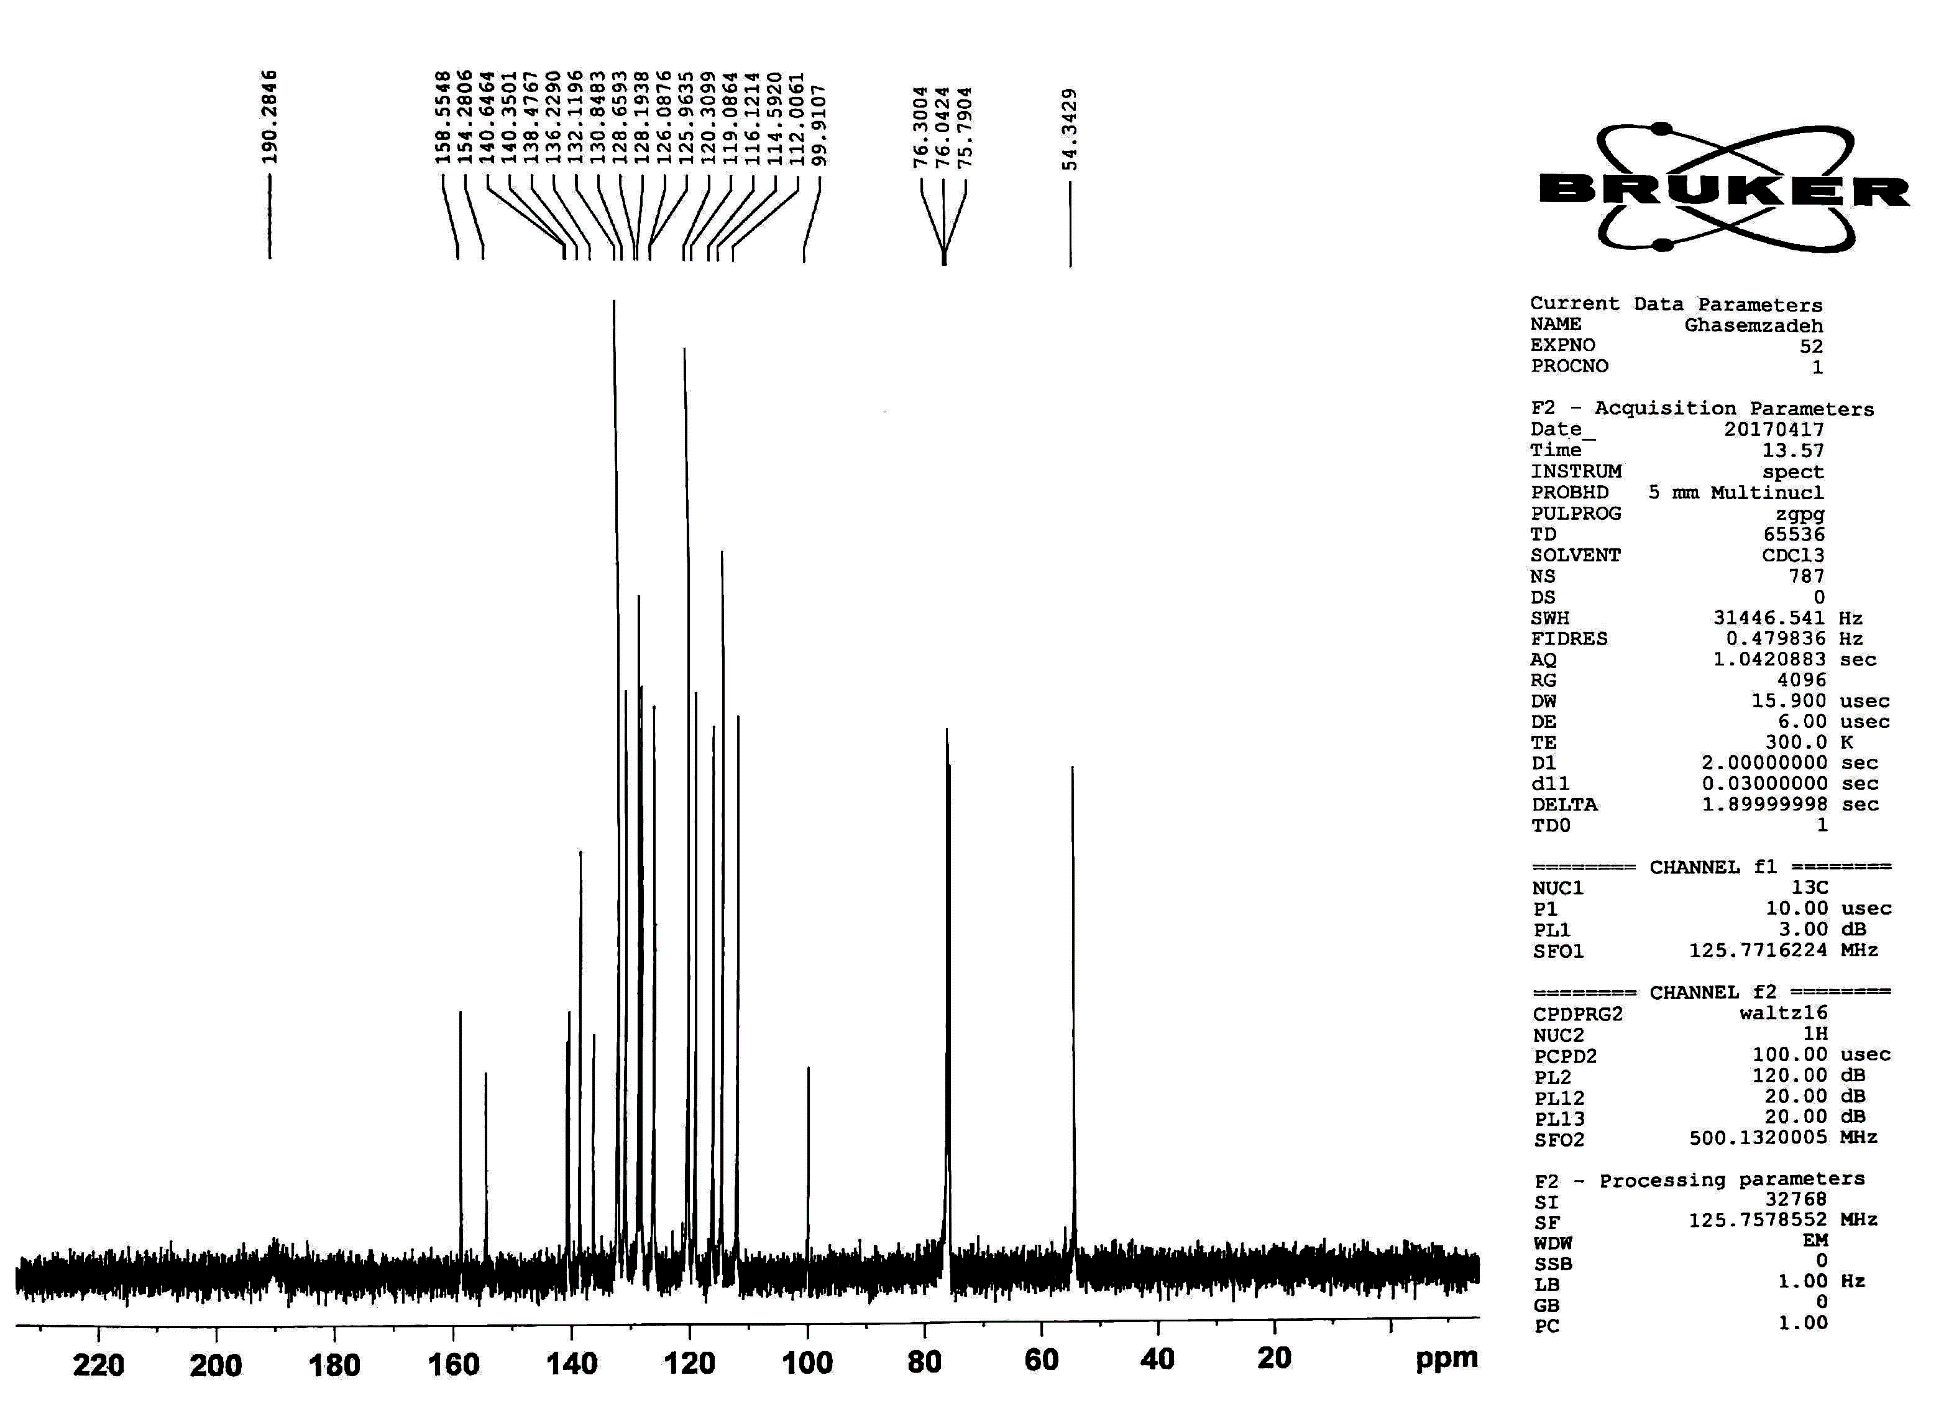


13C NMR of **5e**

Mass spectrum of **5e**


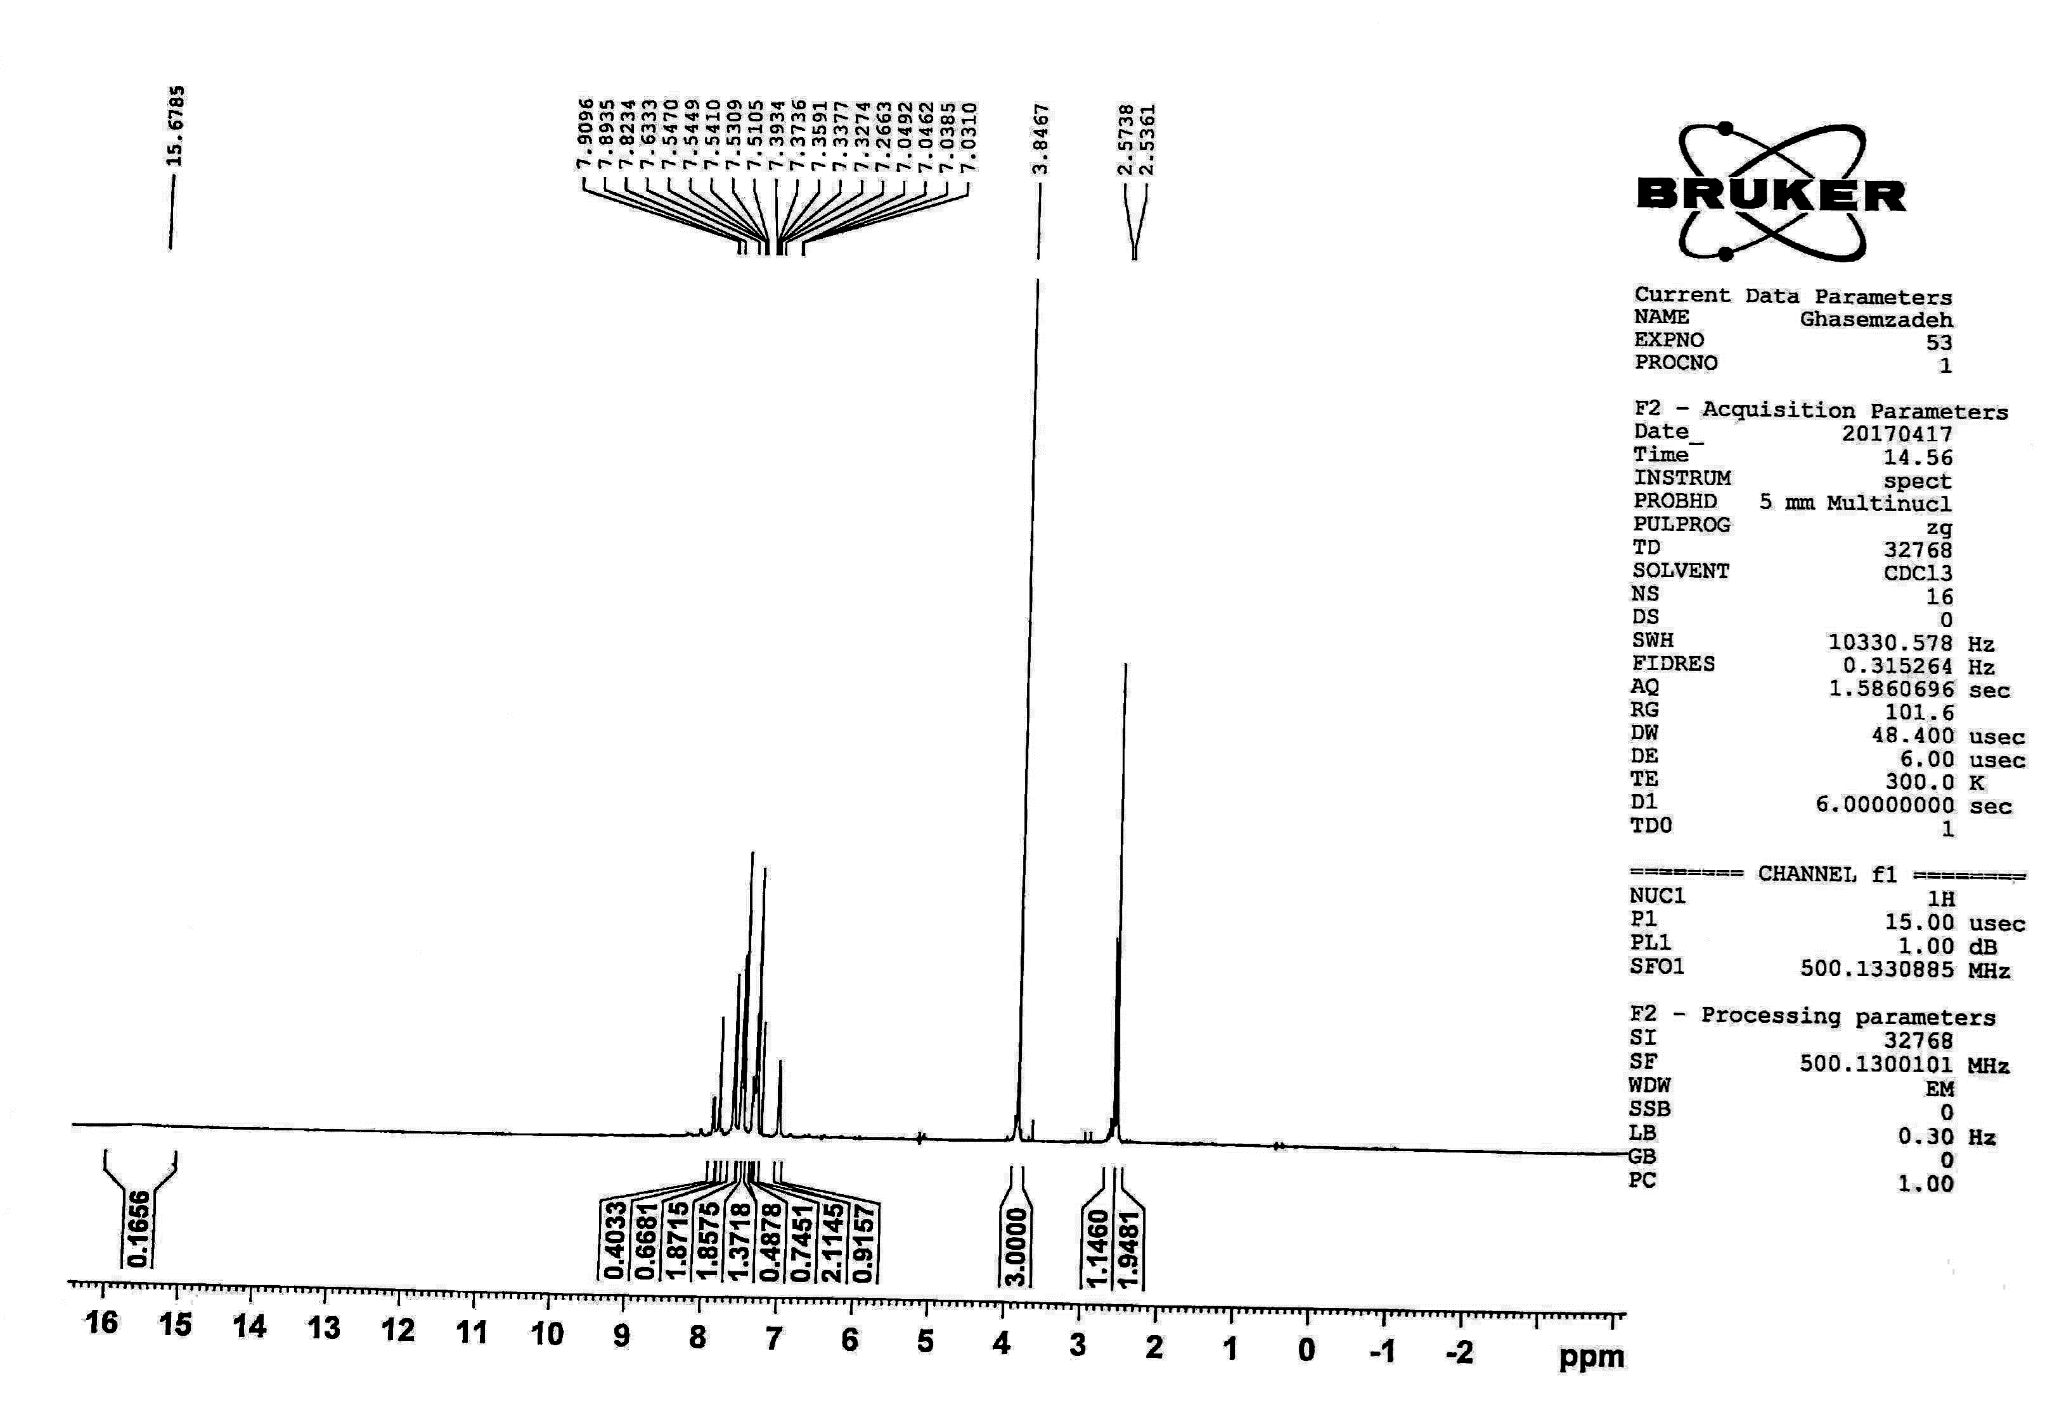


1H NMR of **5f**


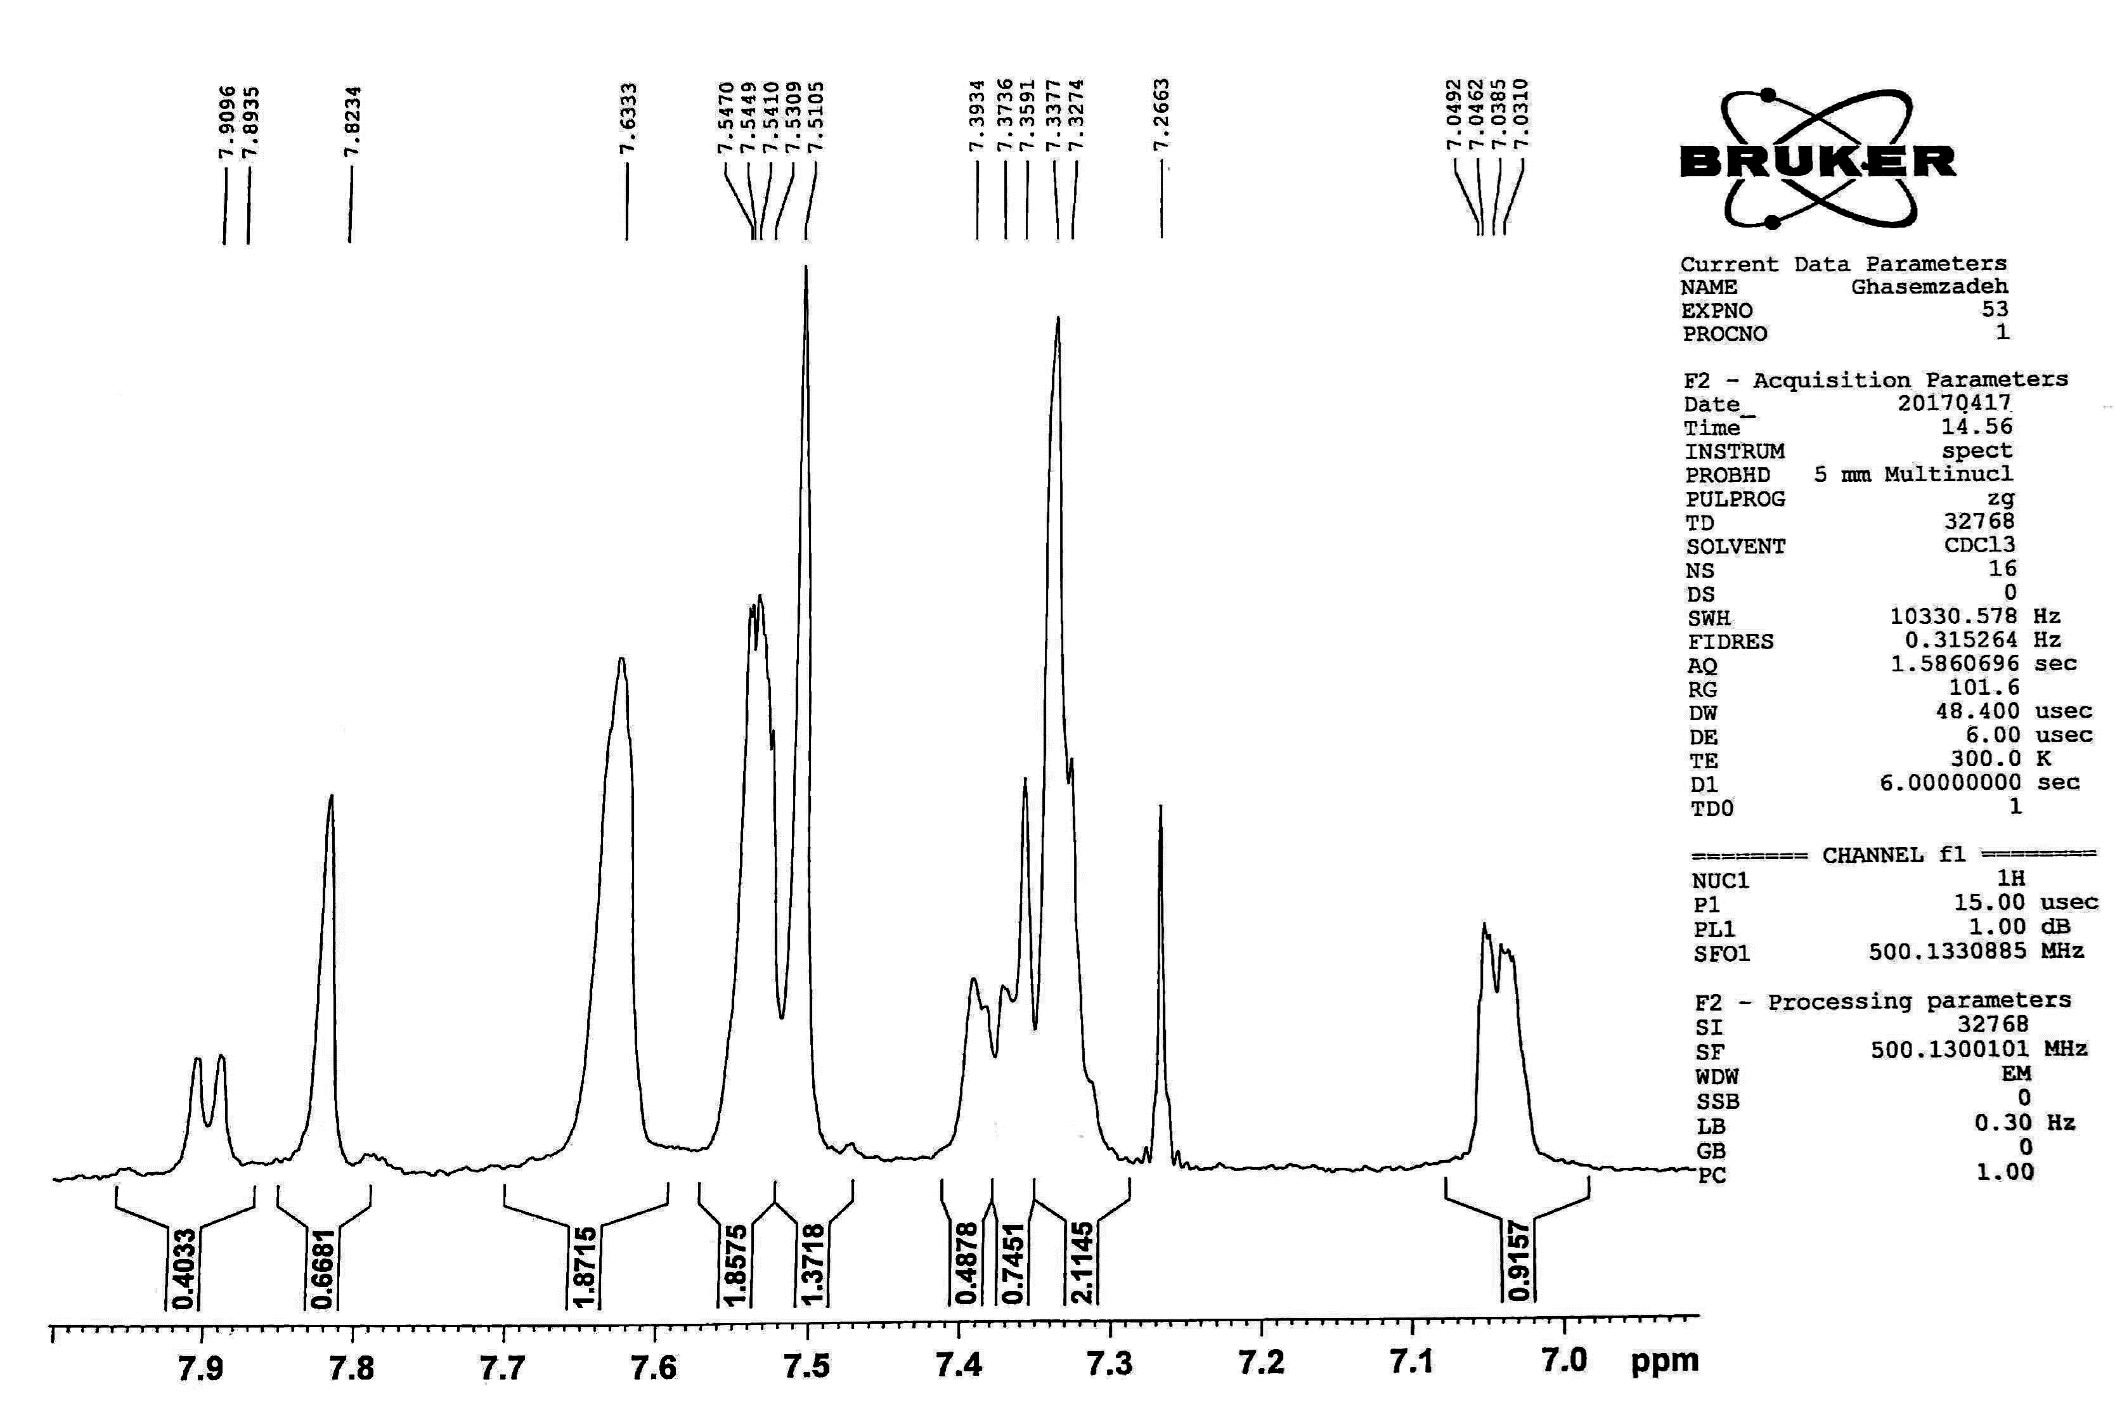


1H NMR of **5f**


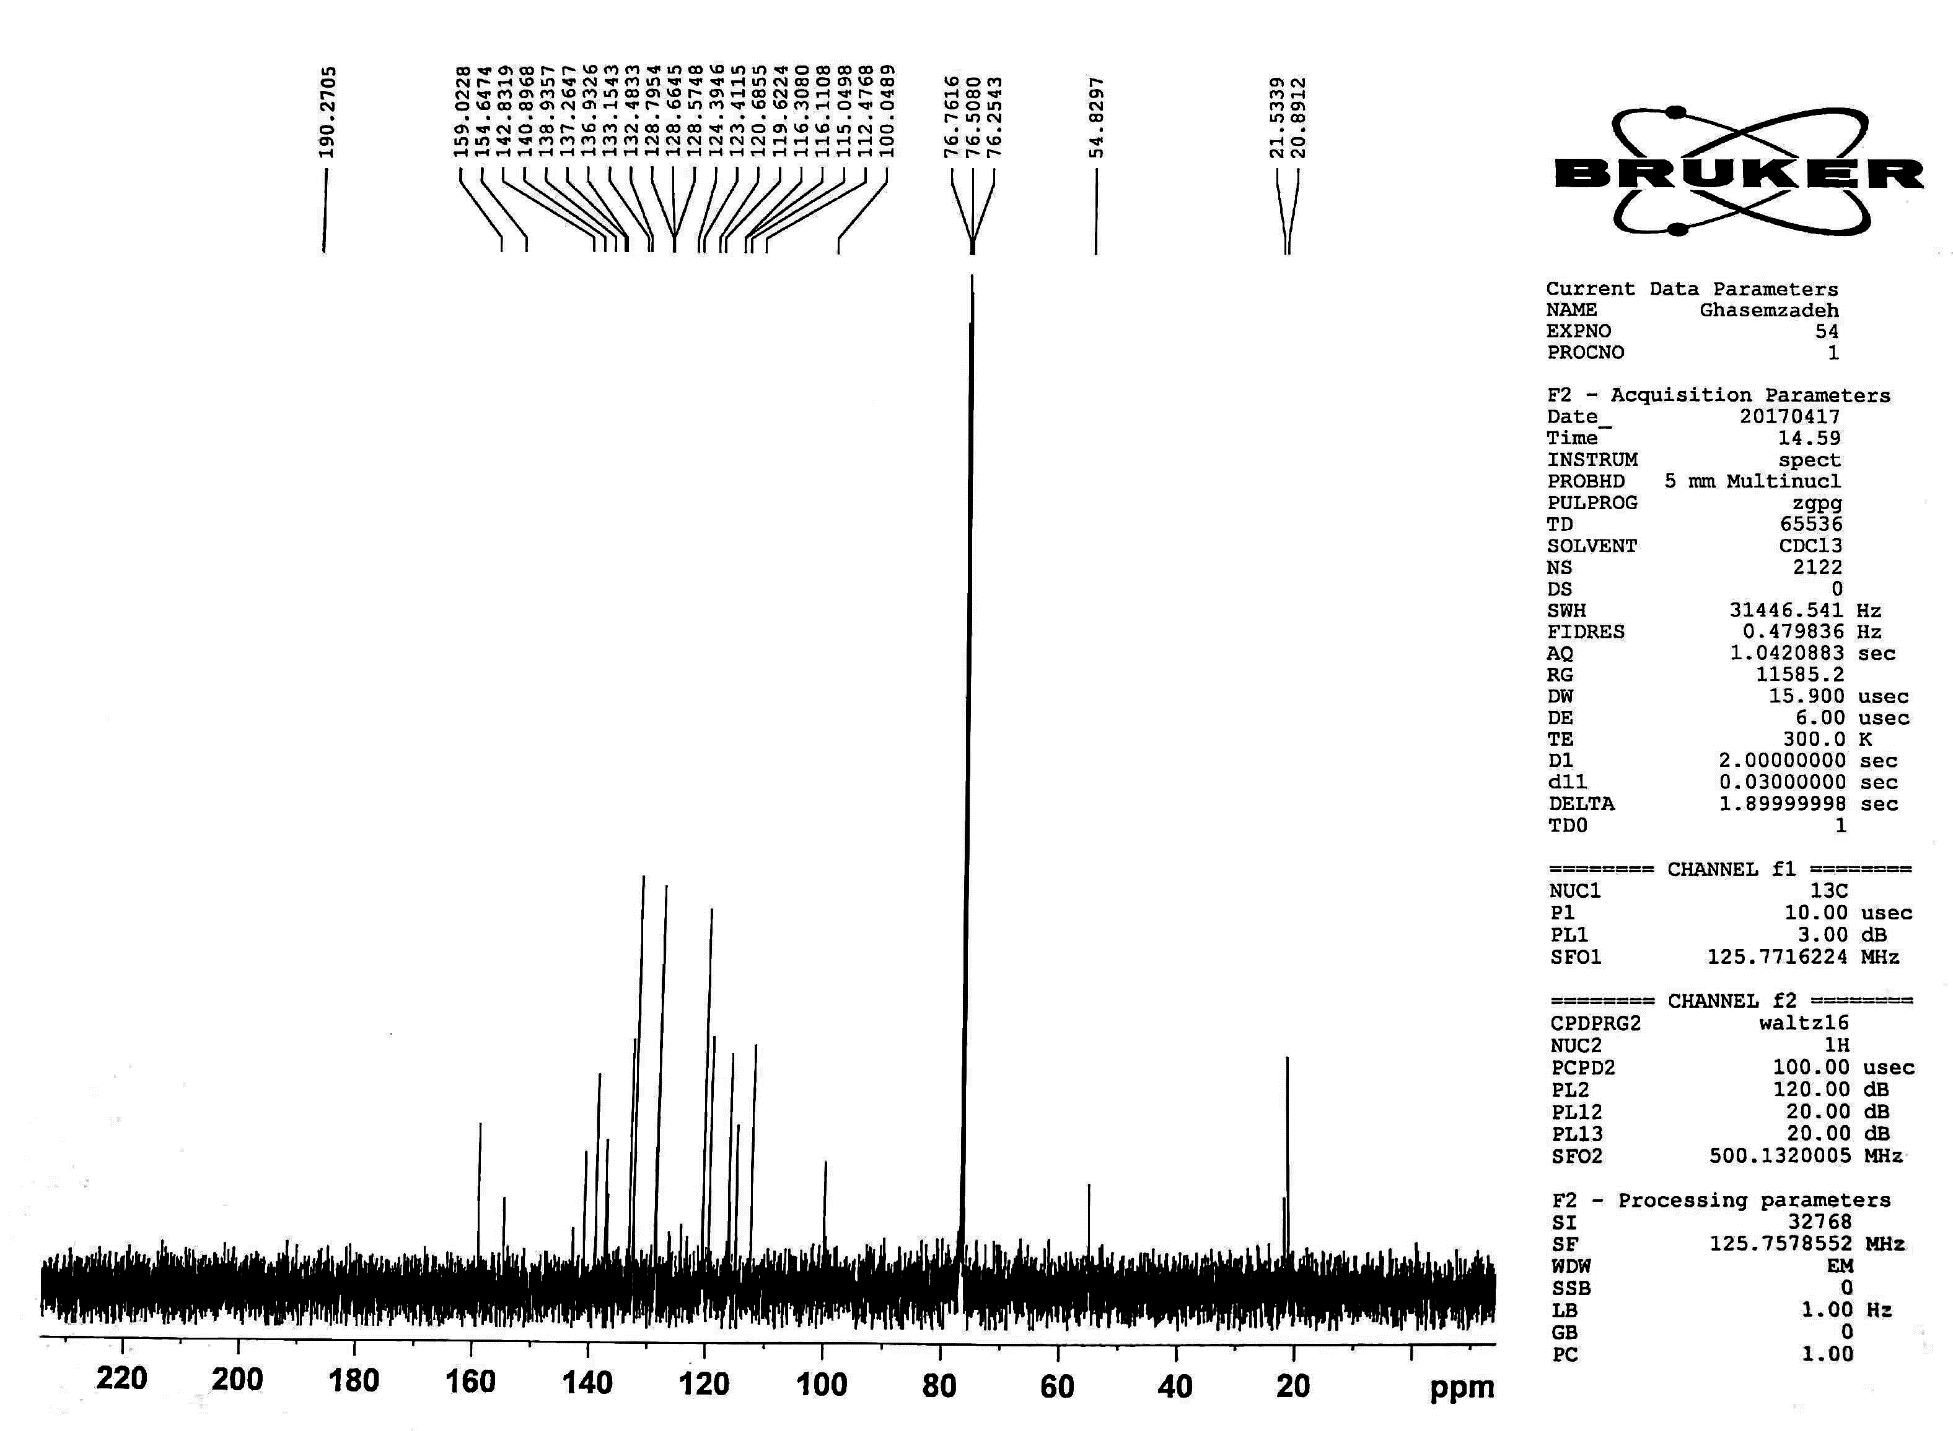


13C NMR of **5f**


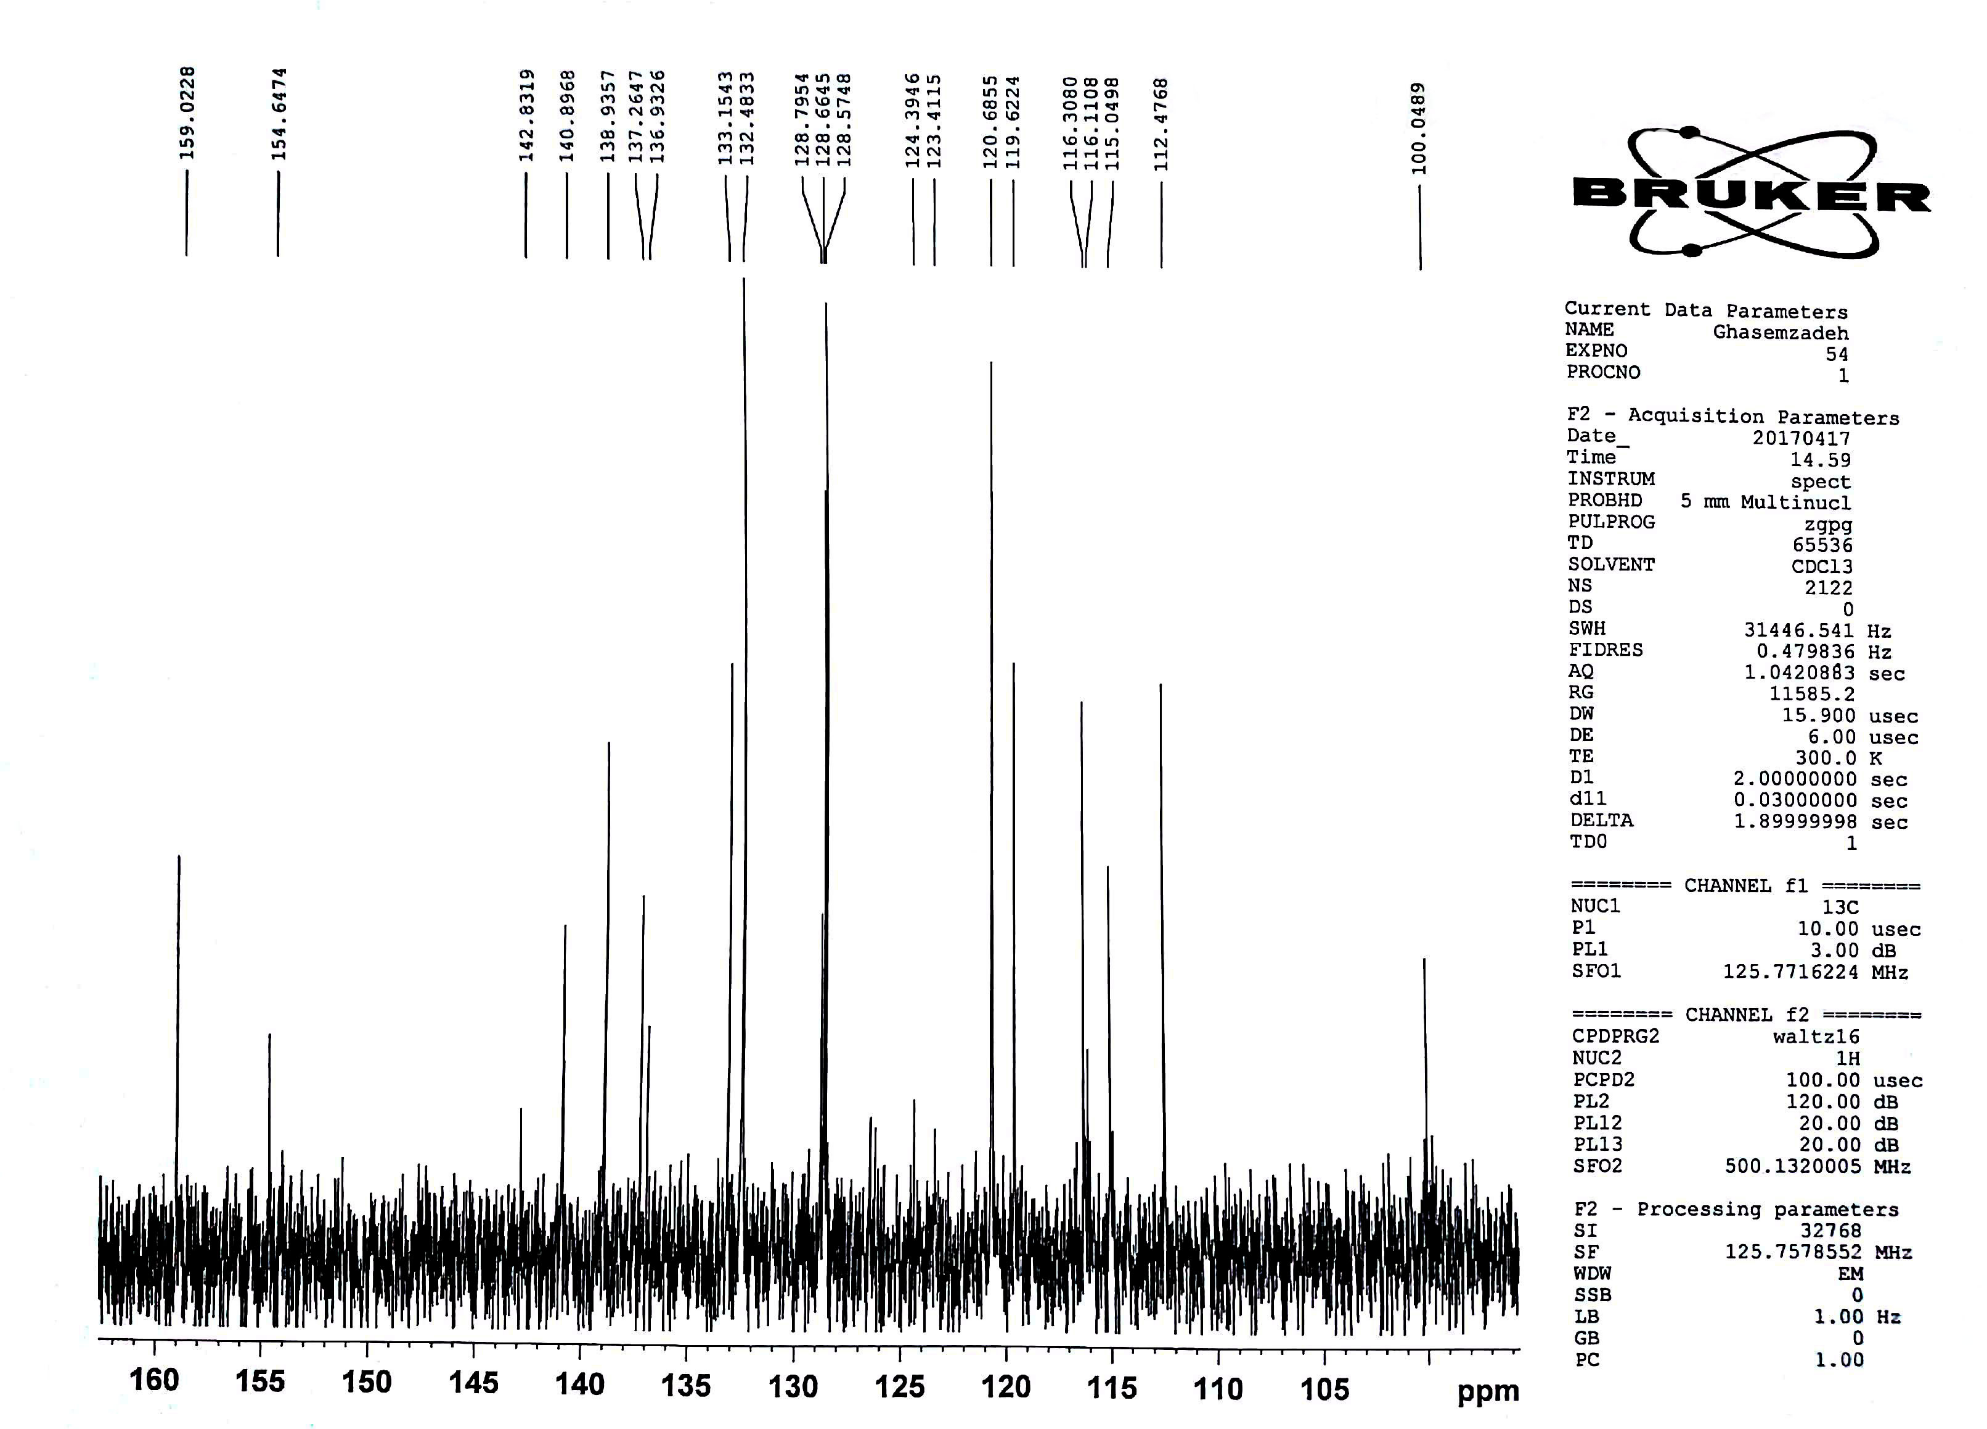


13C NMR of **5f**

Mass spectrum of **5f**


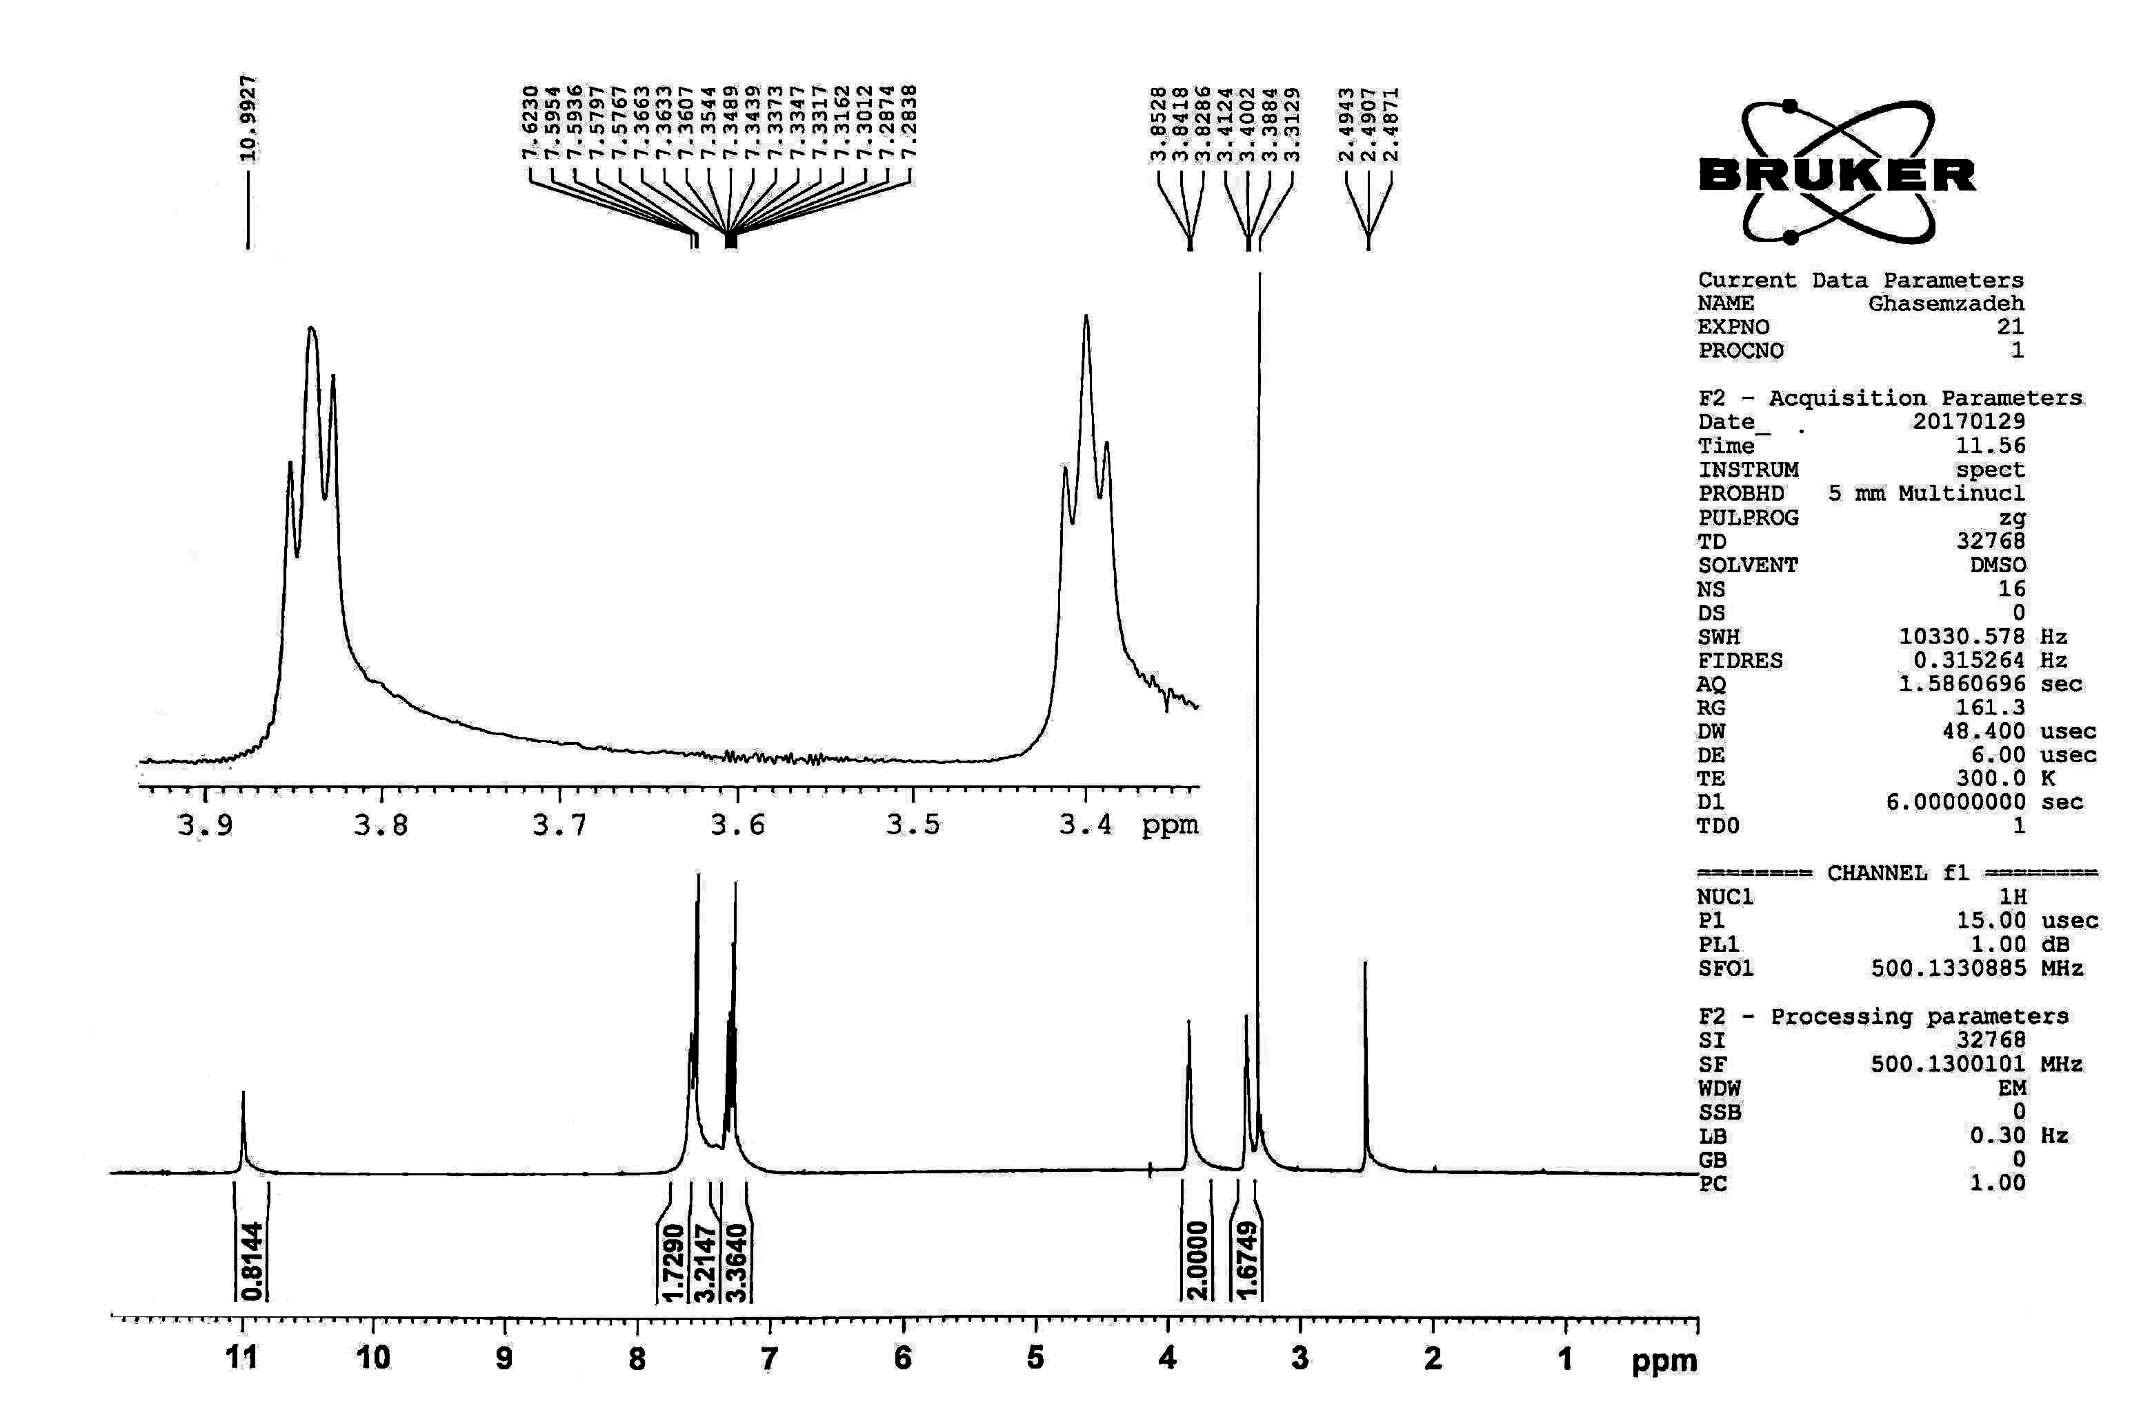


1H NMR of **6**


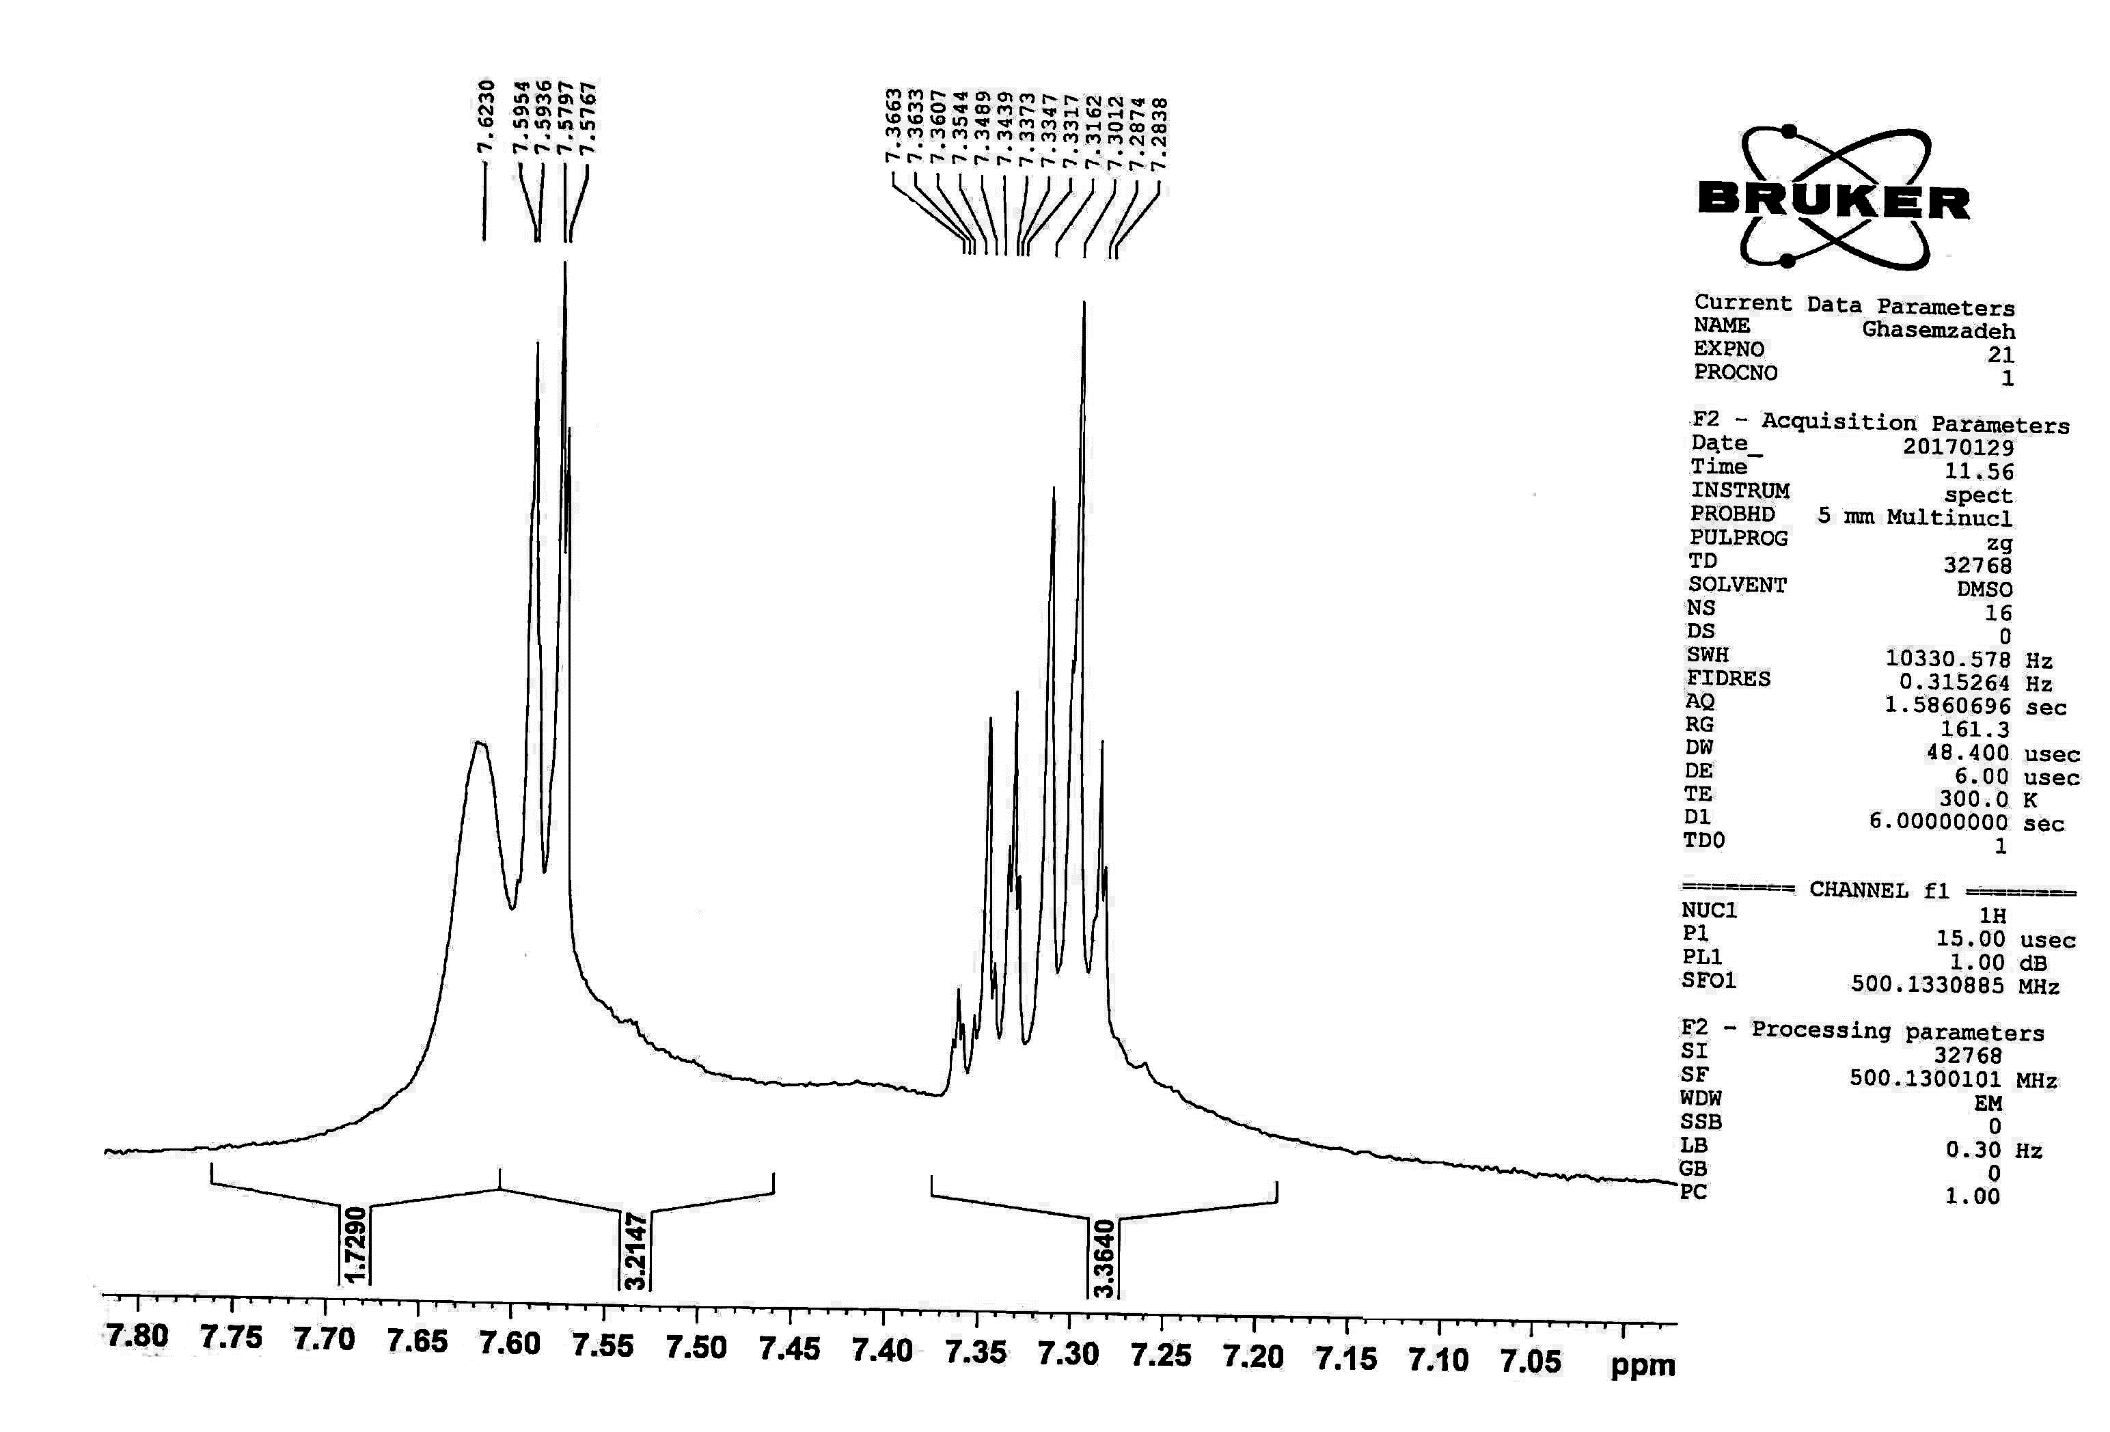


1H NMR of **6**

**
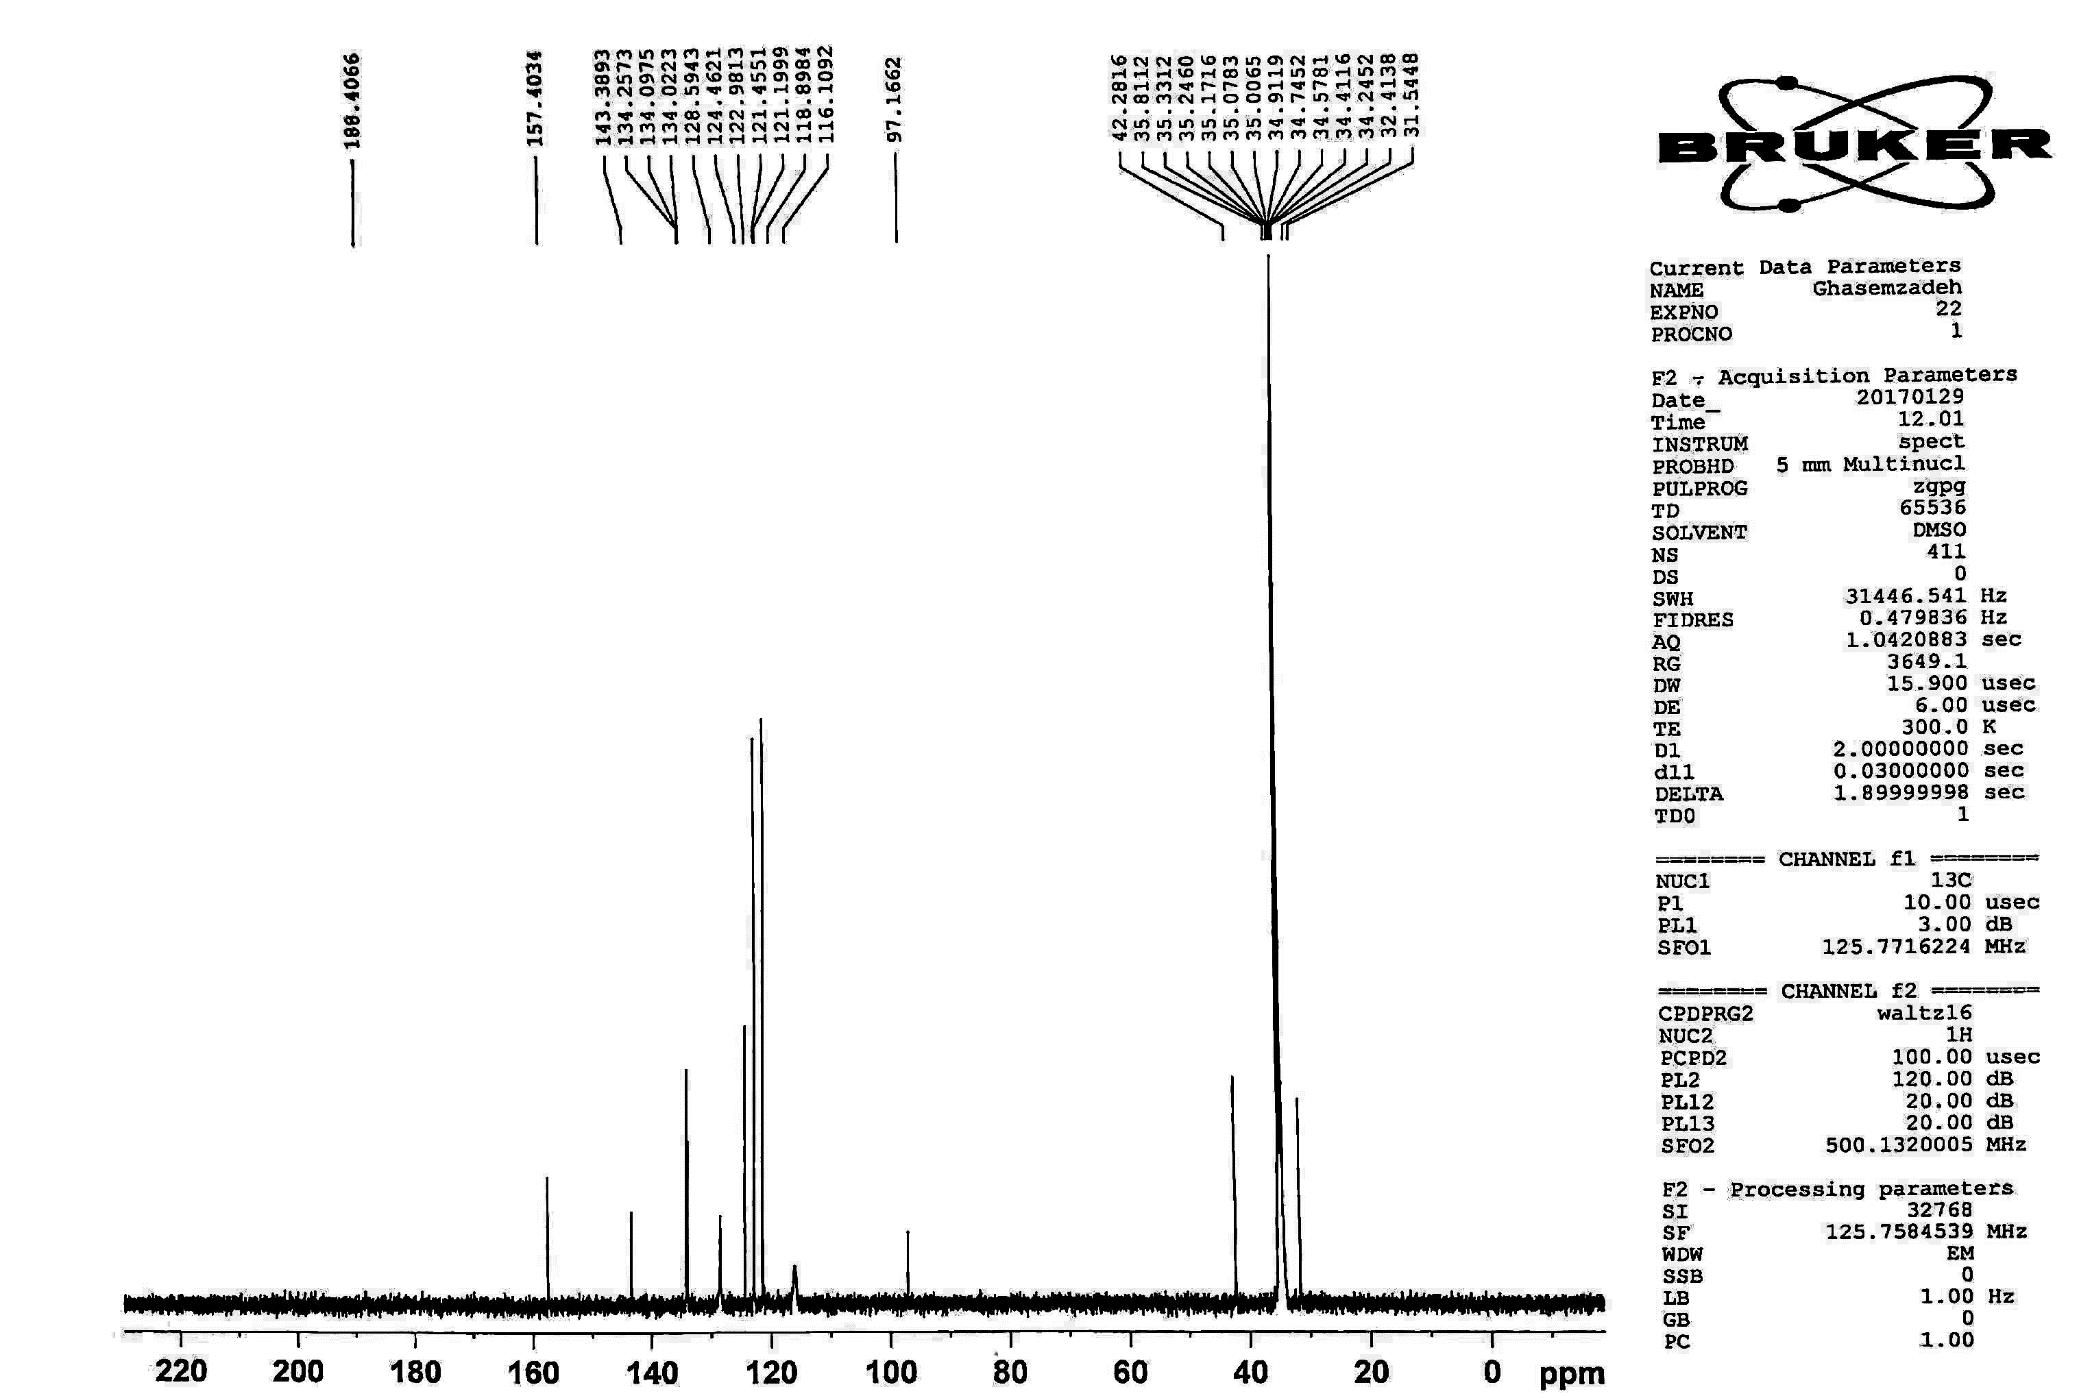
**

13C NMR of **6**

Mass spectrum of **6**


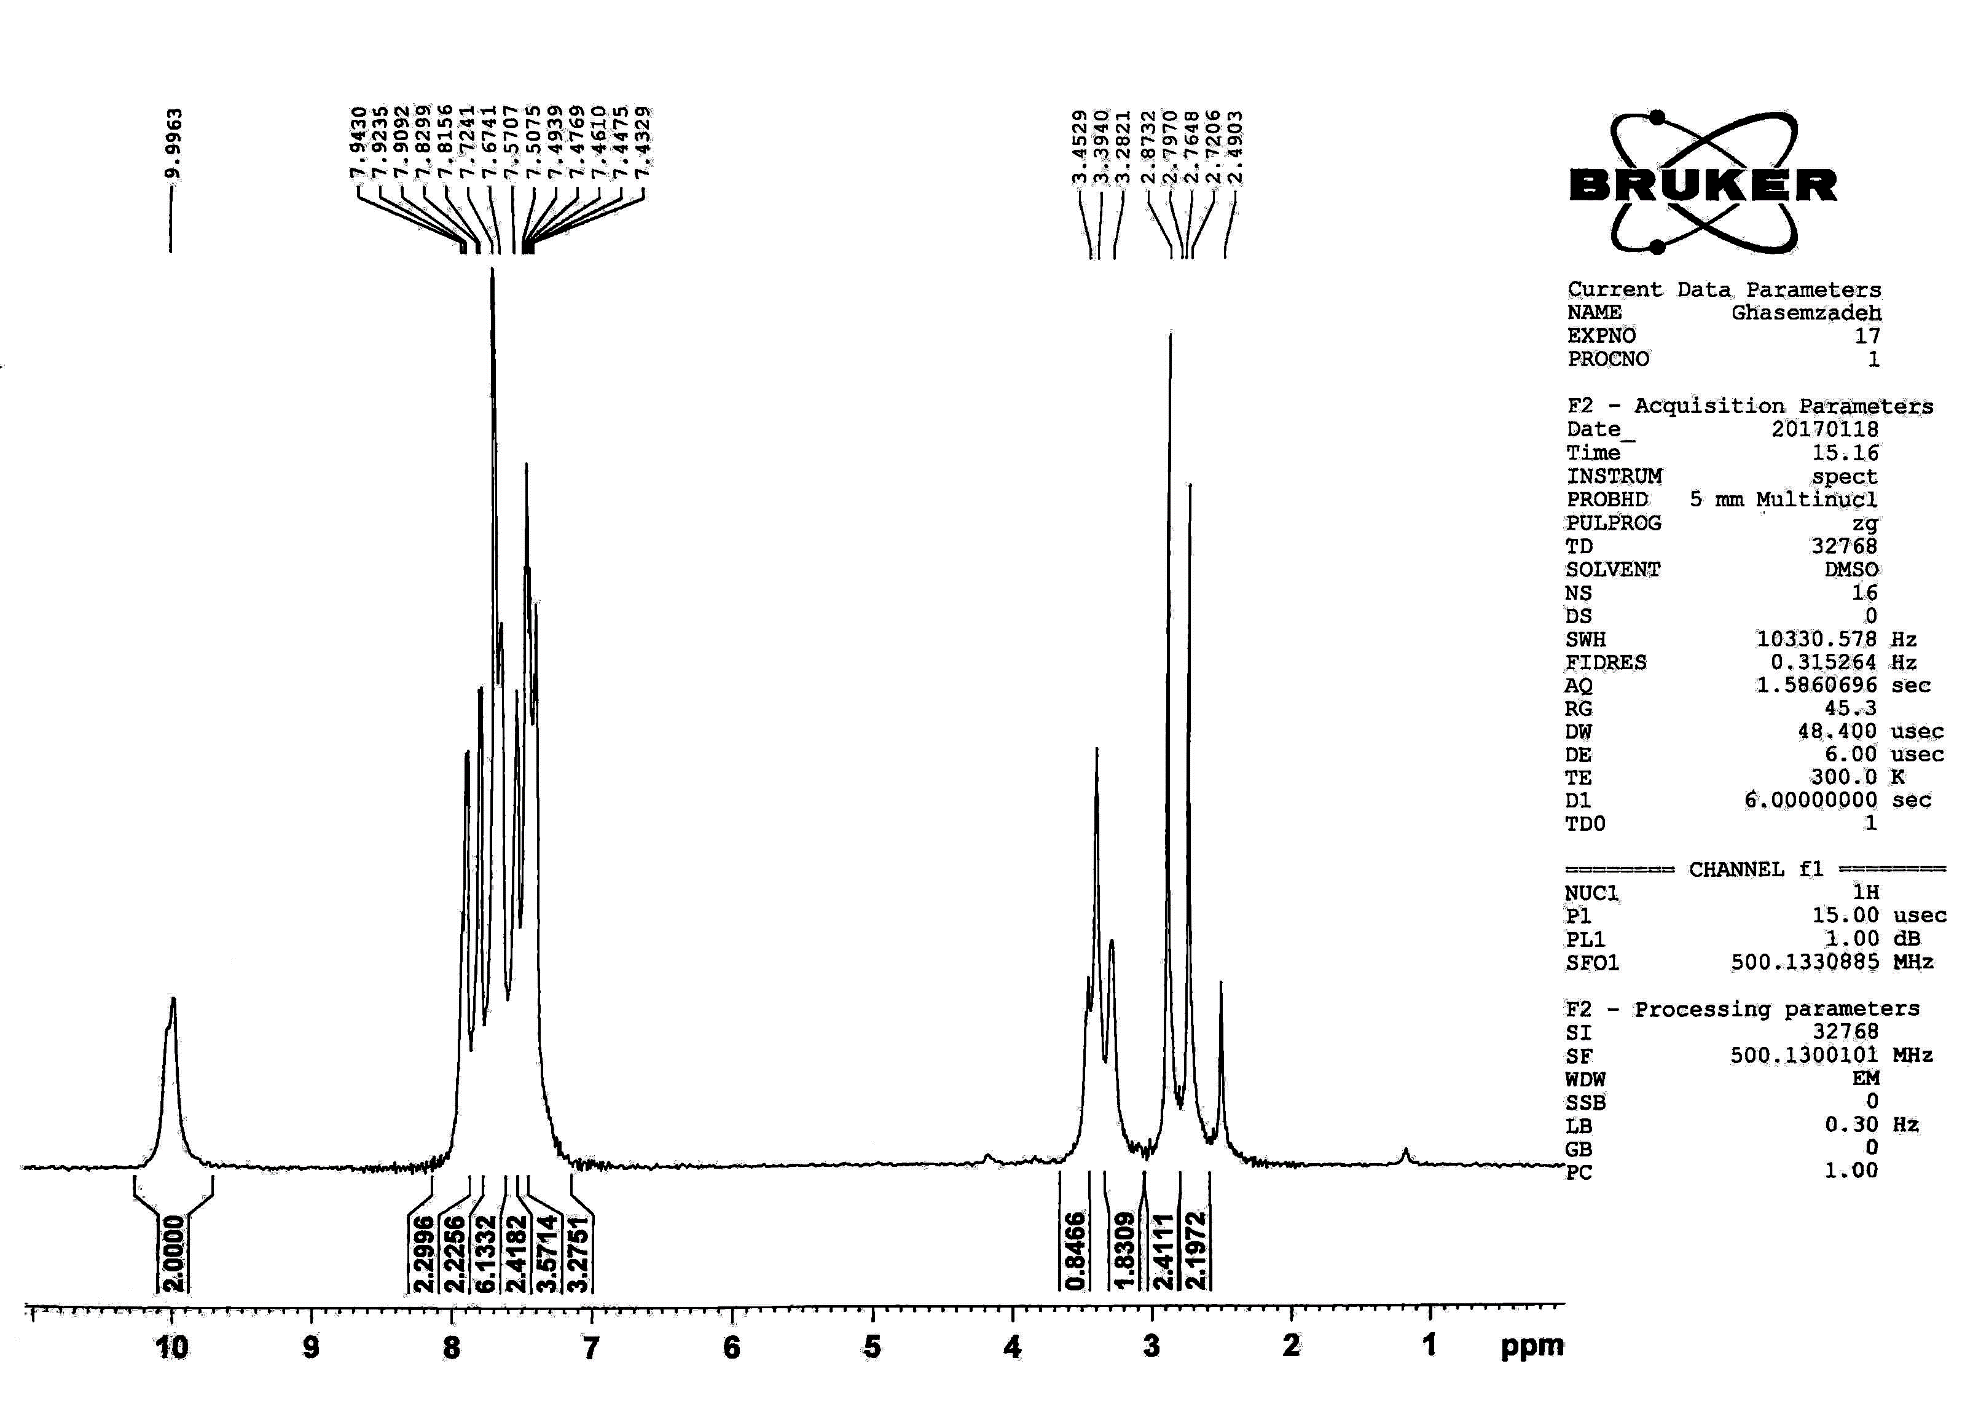


1H NMR of **7**


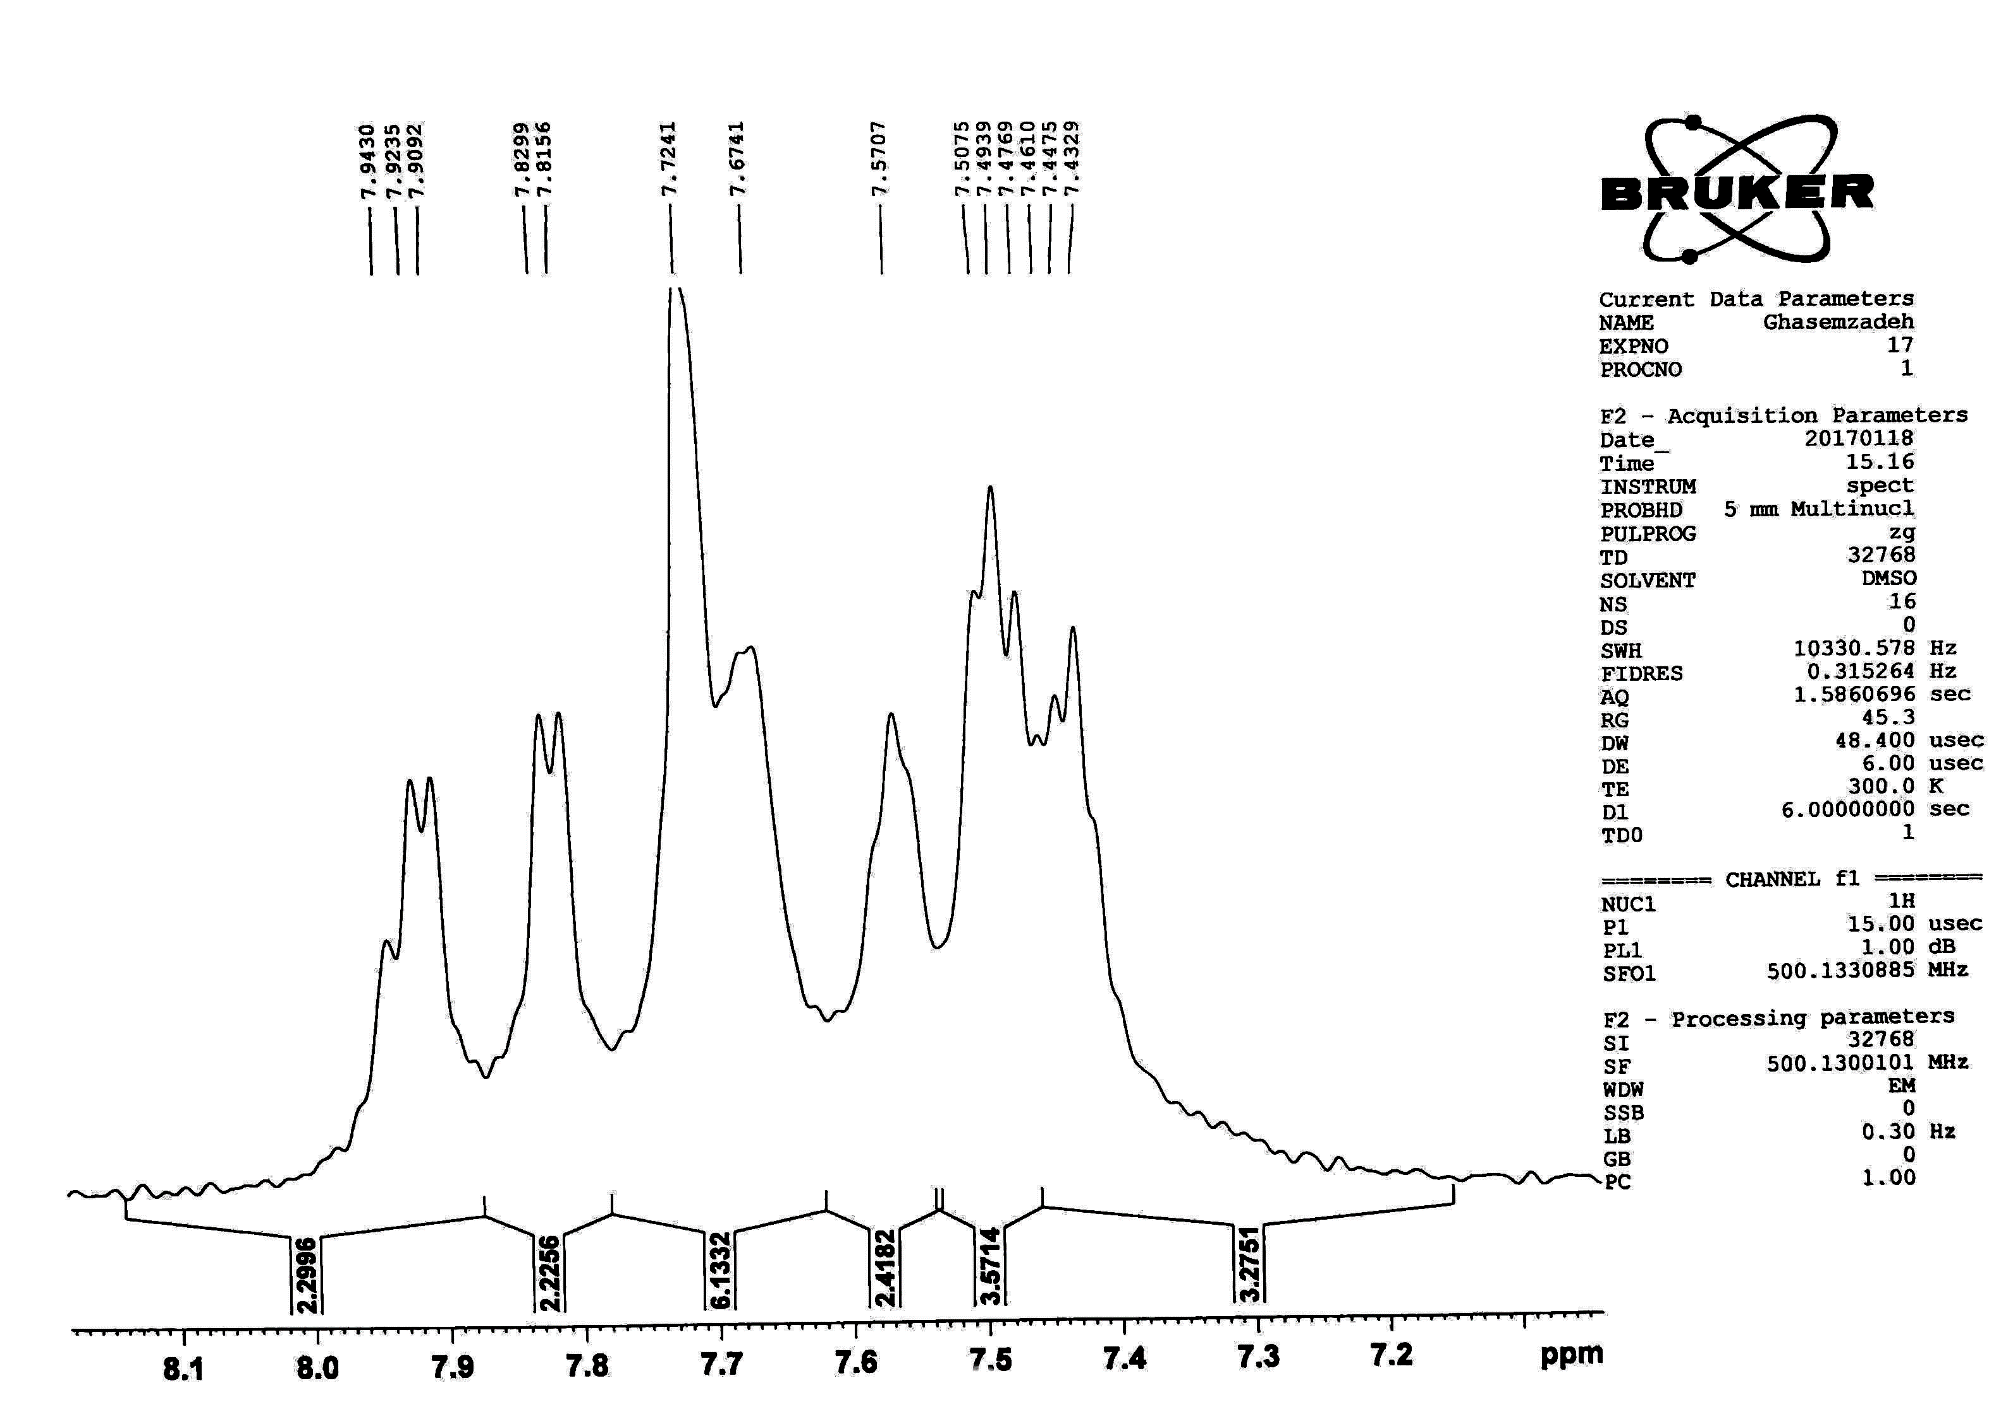


1H NMR of **7**

Mass spectrum of **7**


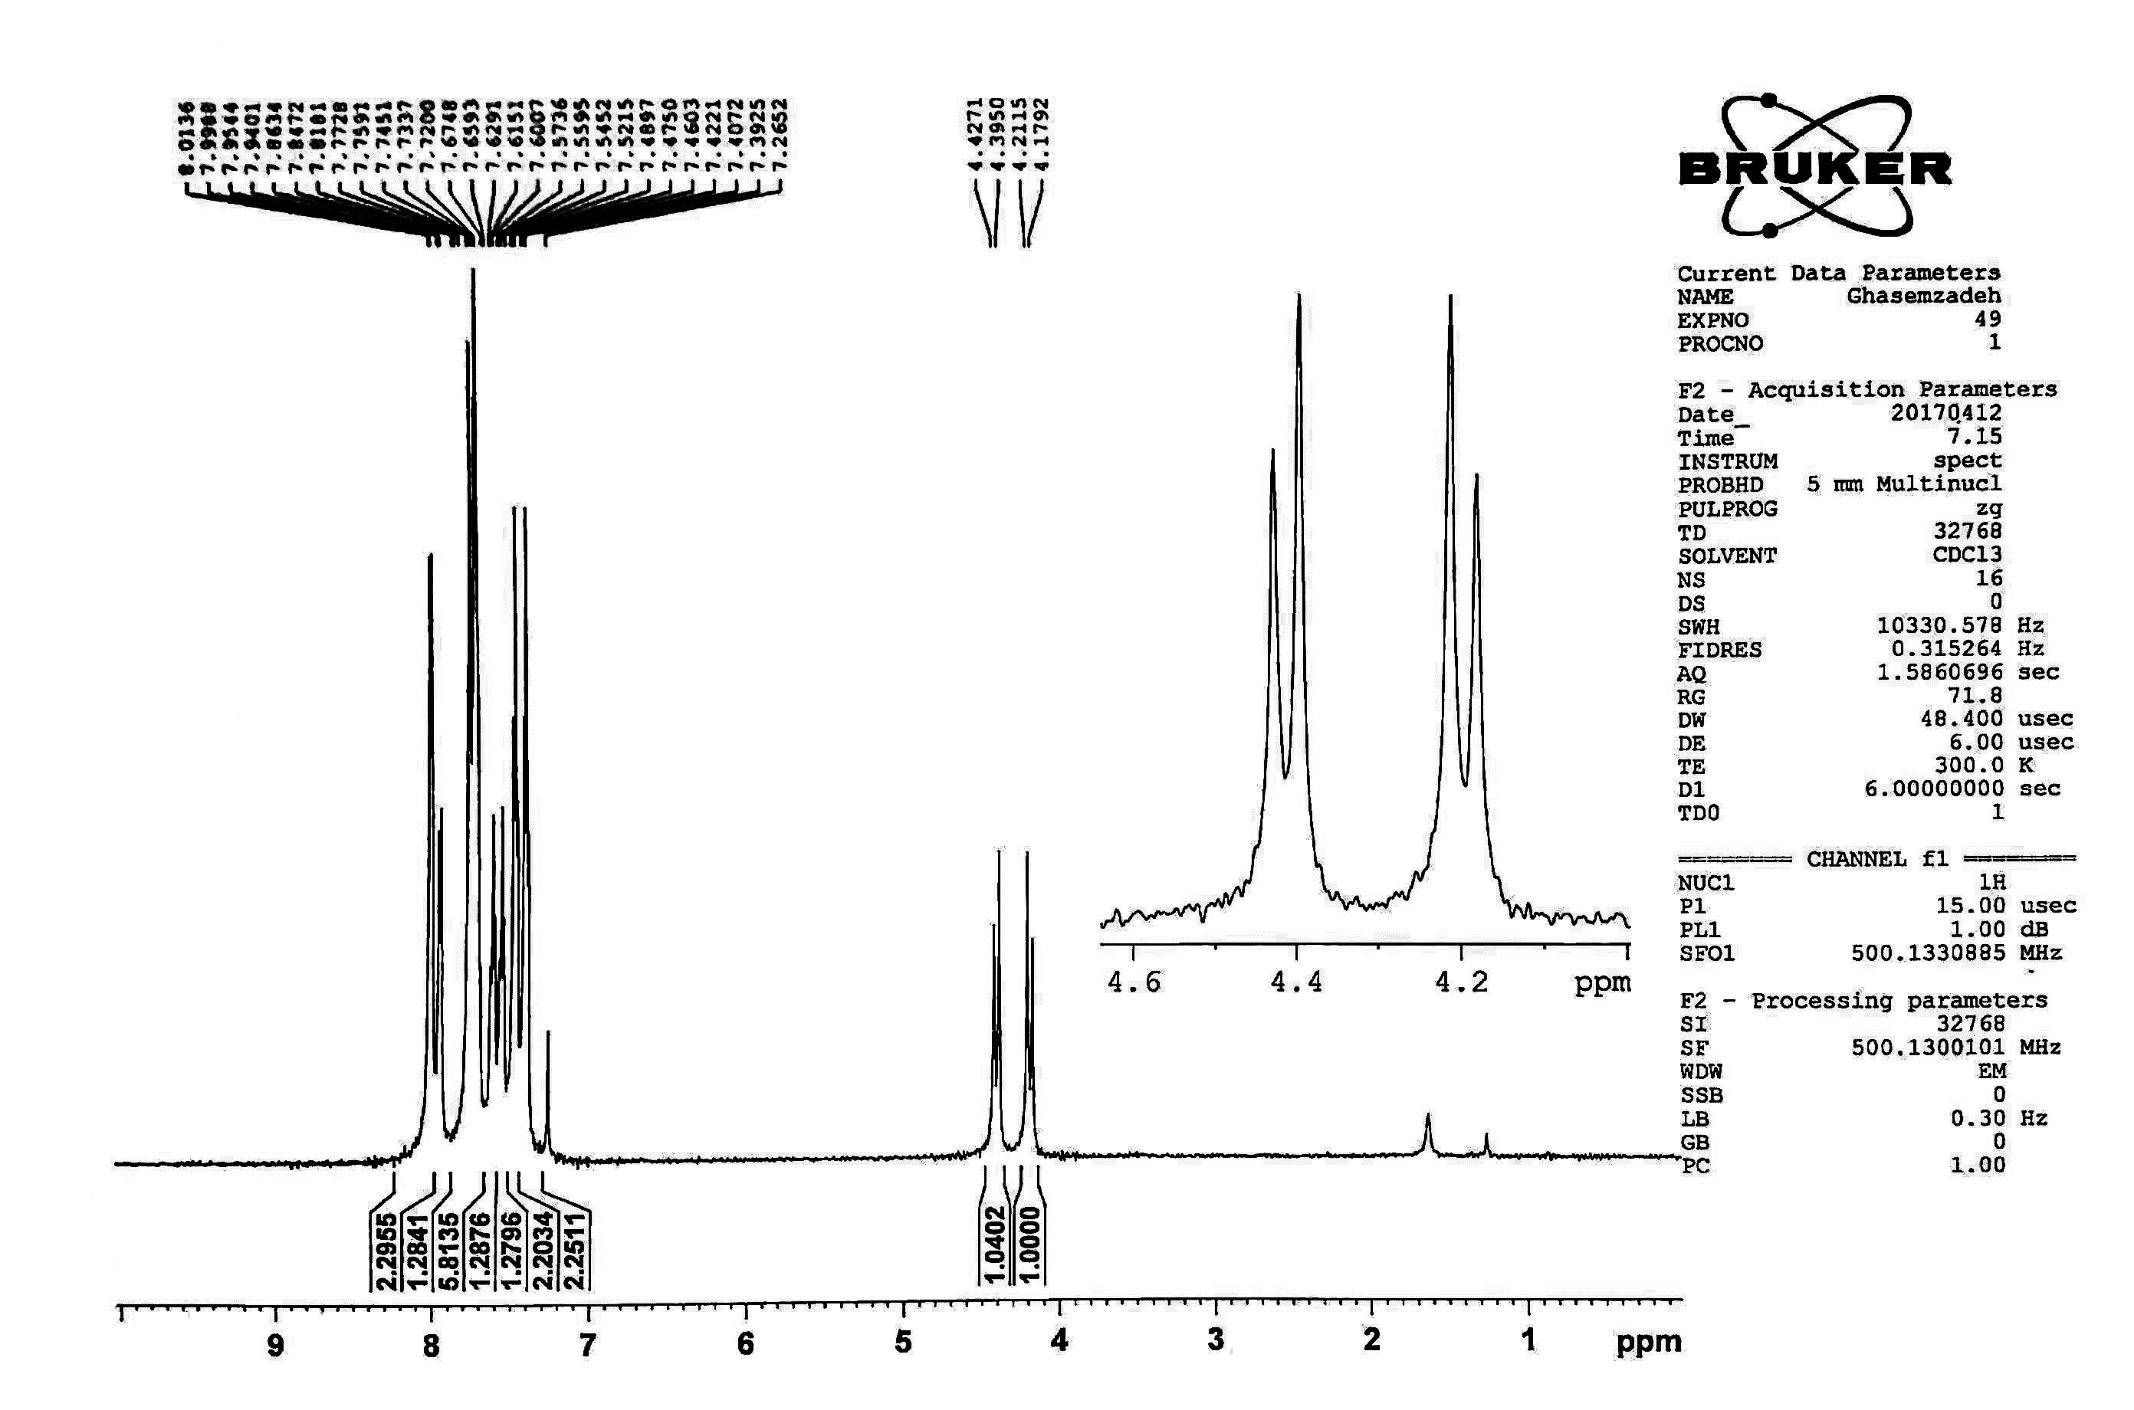


1H NMR of **I**

**
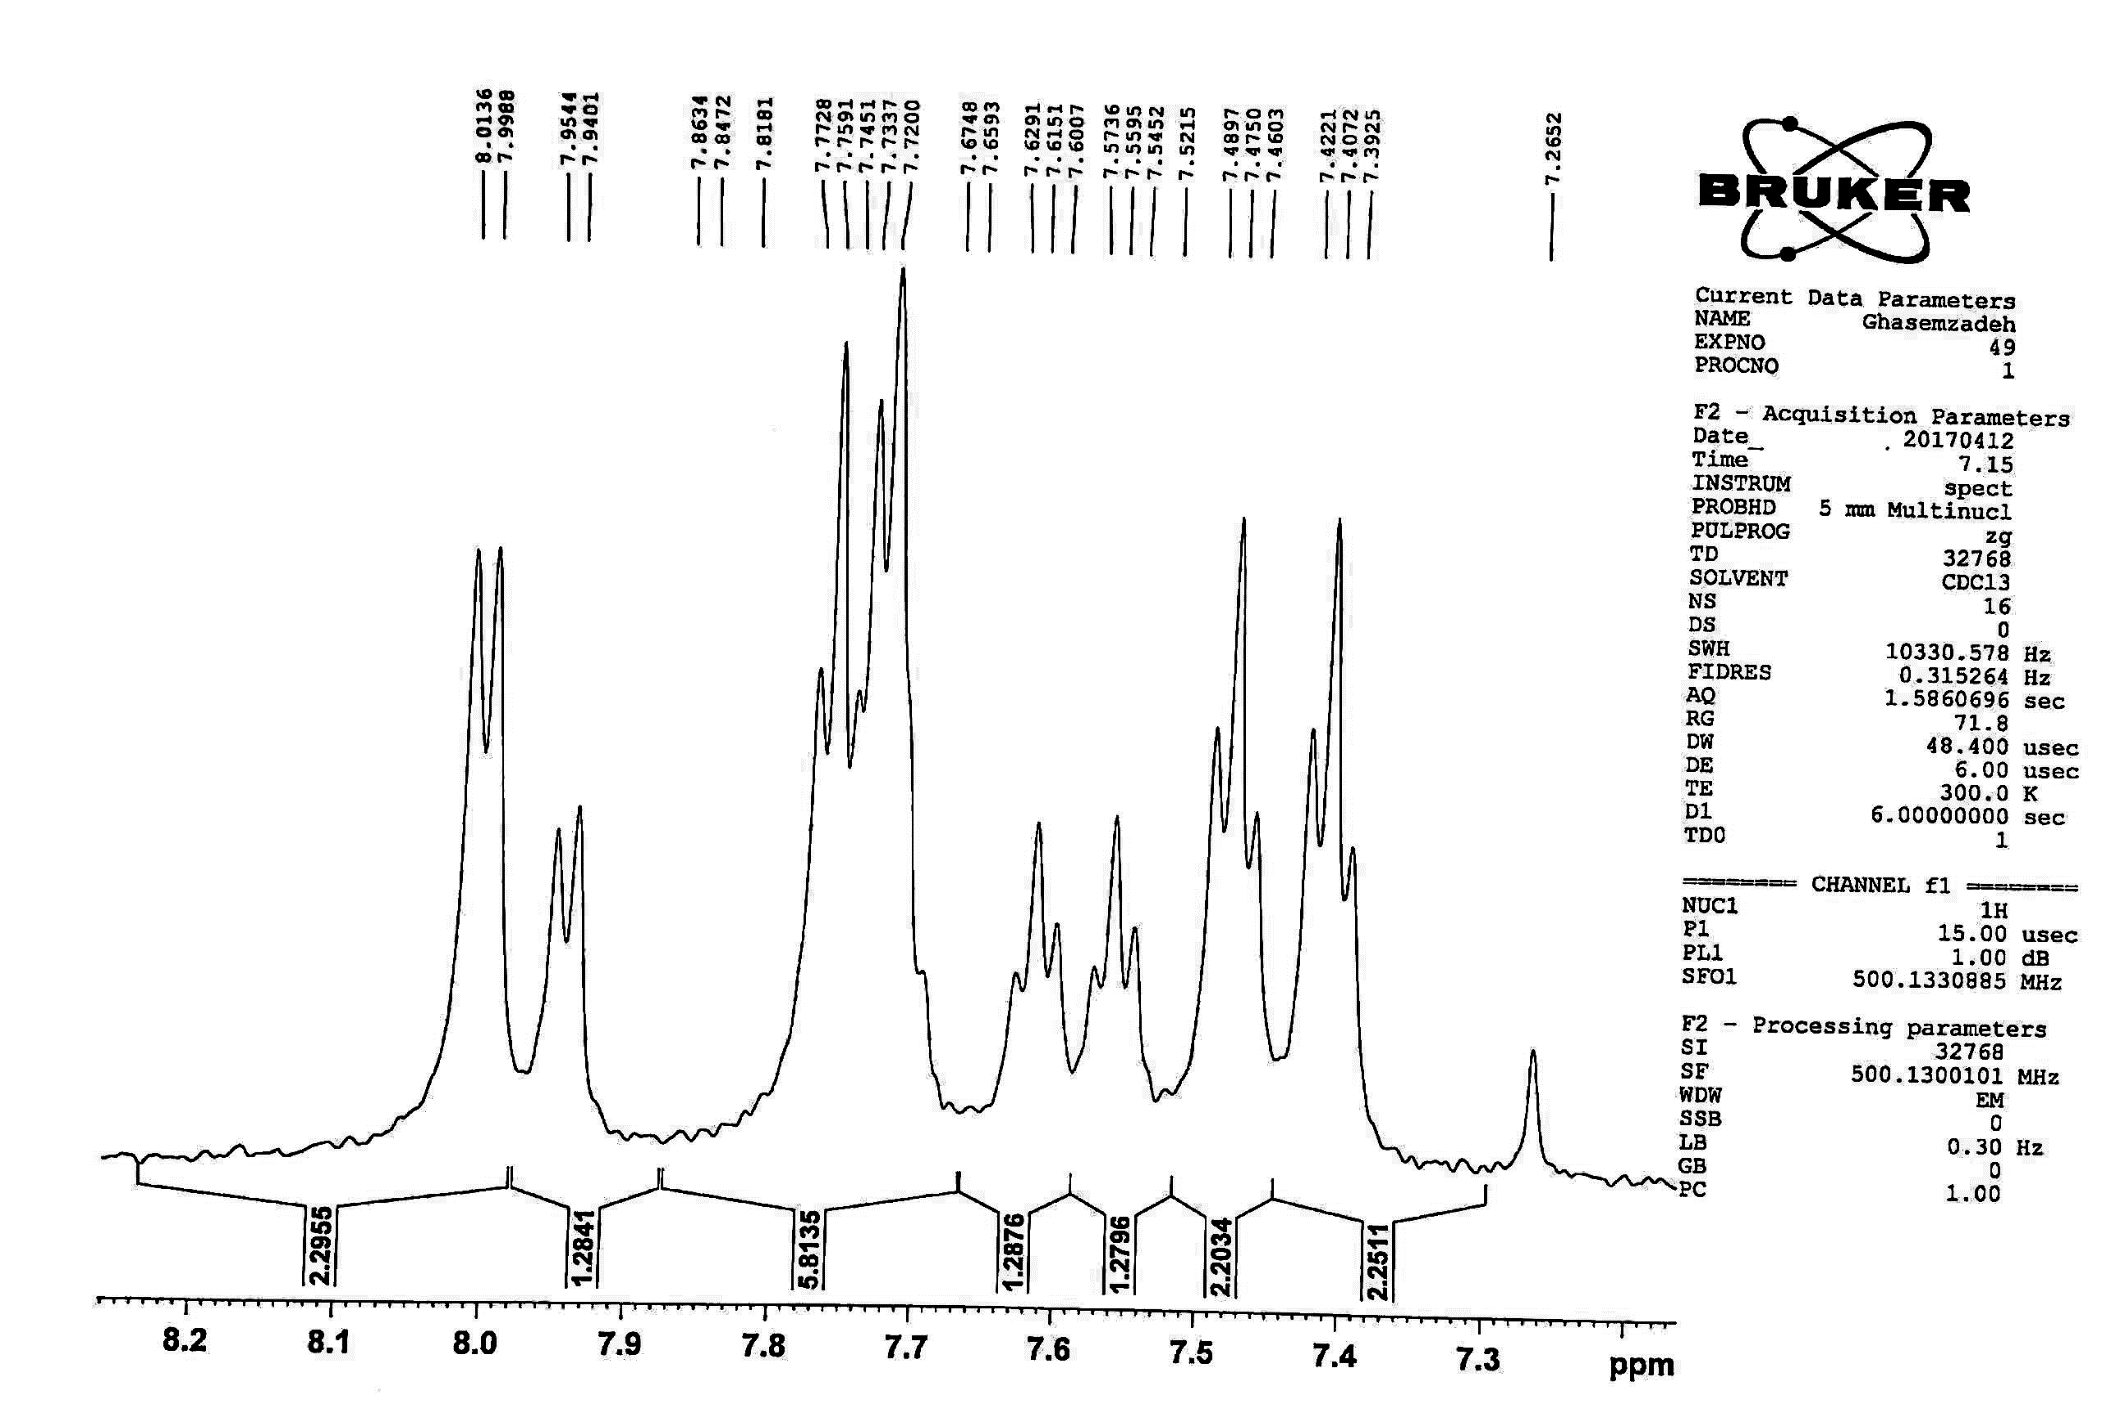
**

1H NMR of **I**

**
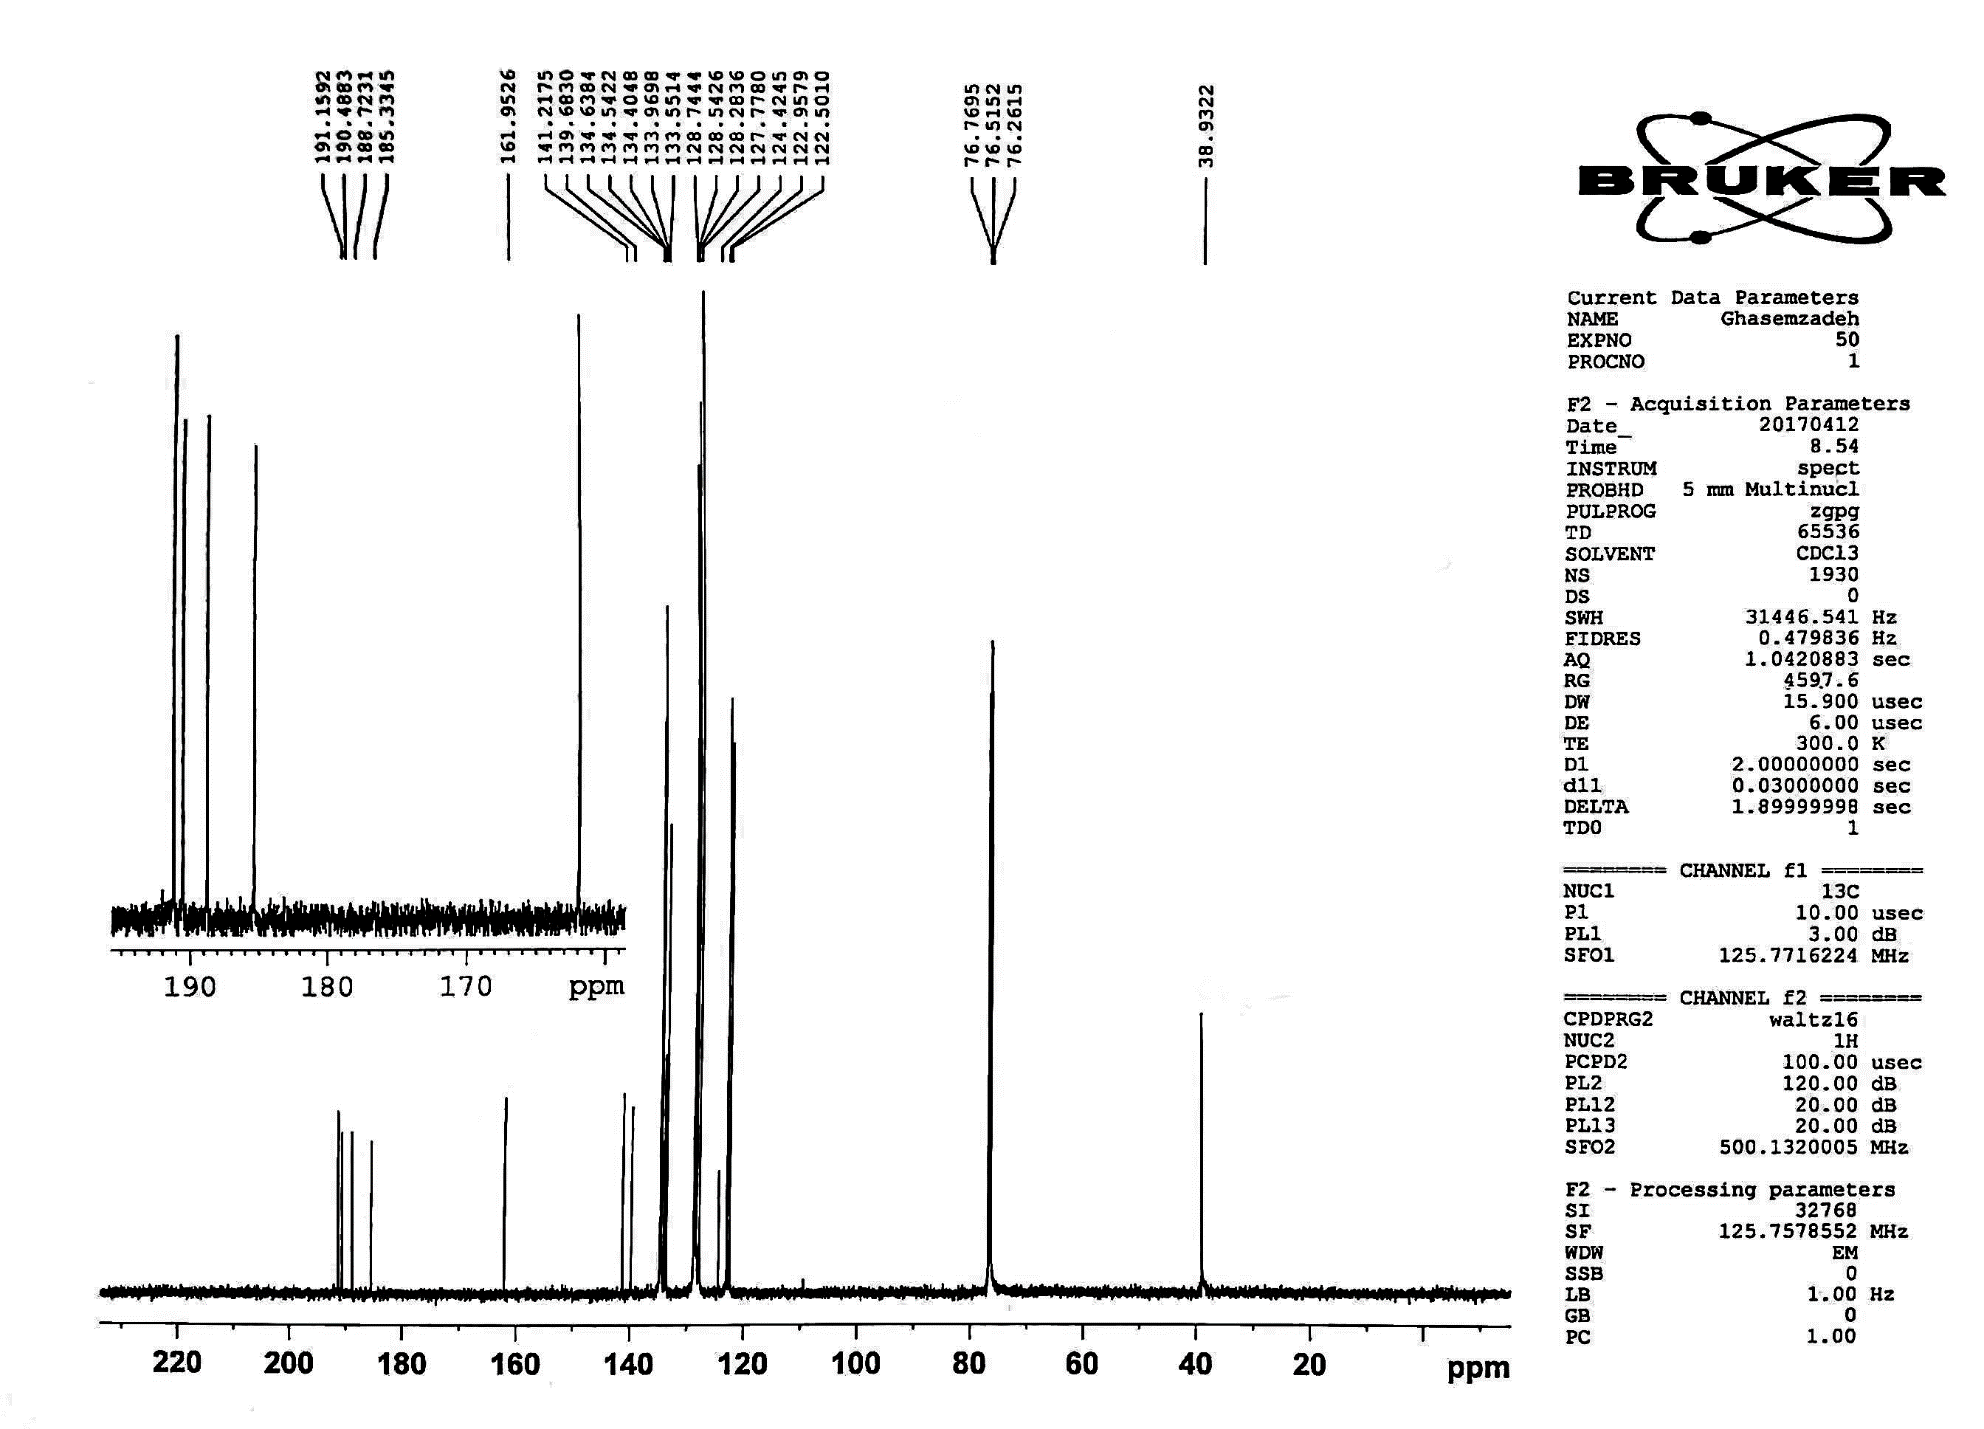
**

13C NMR of **I**

**
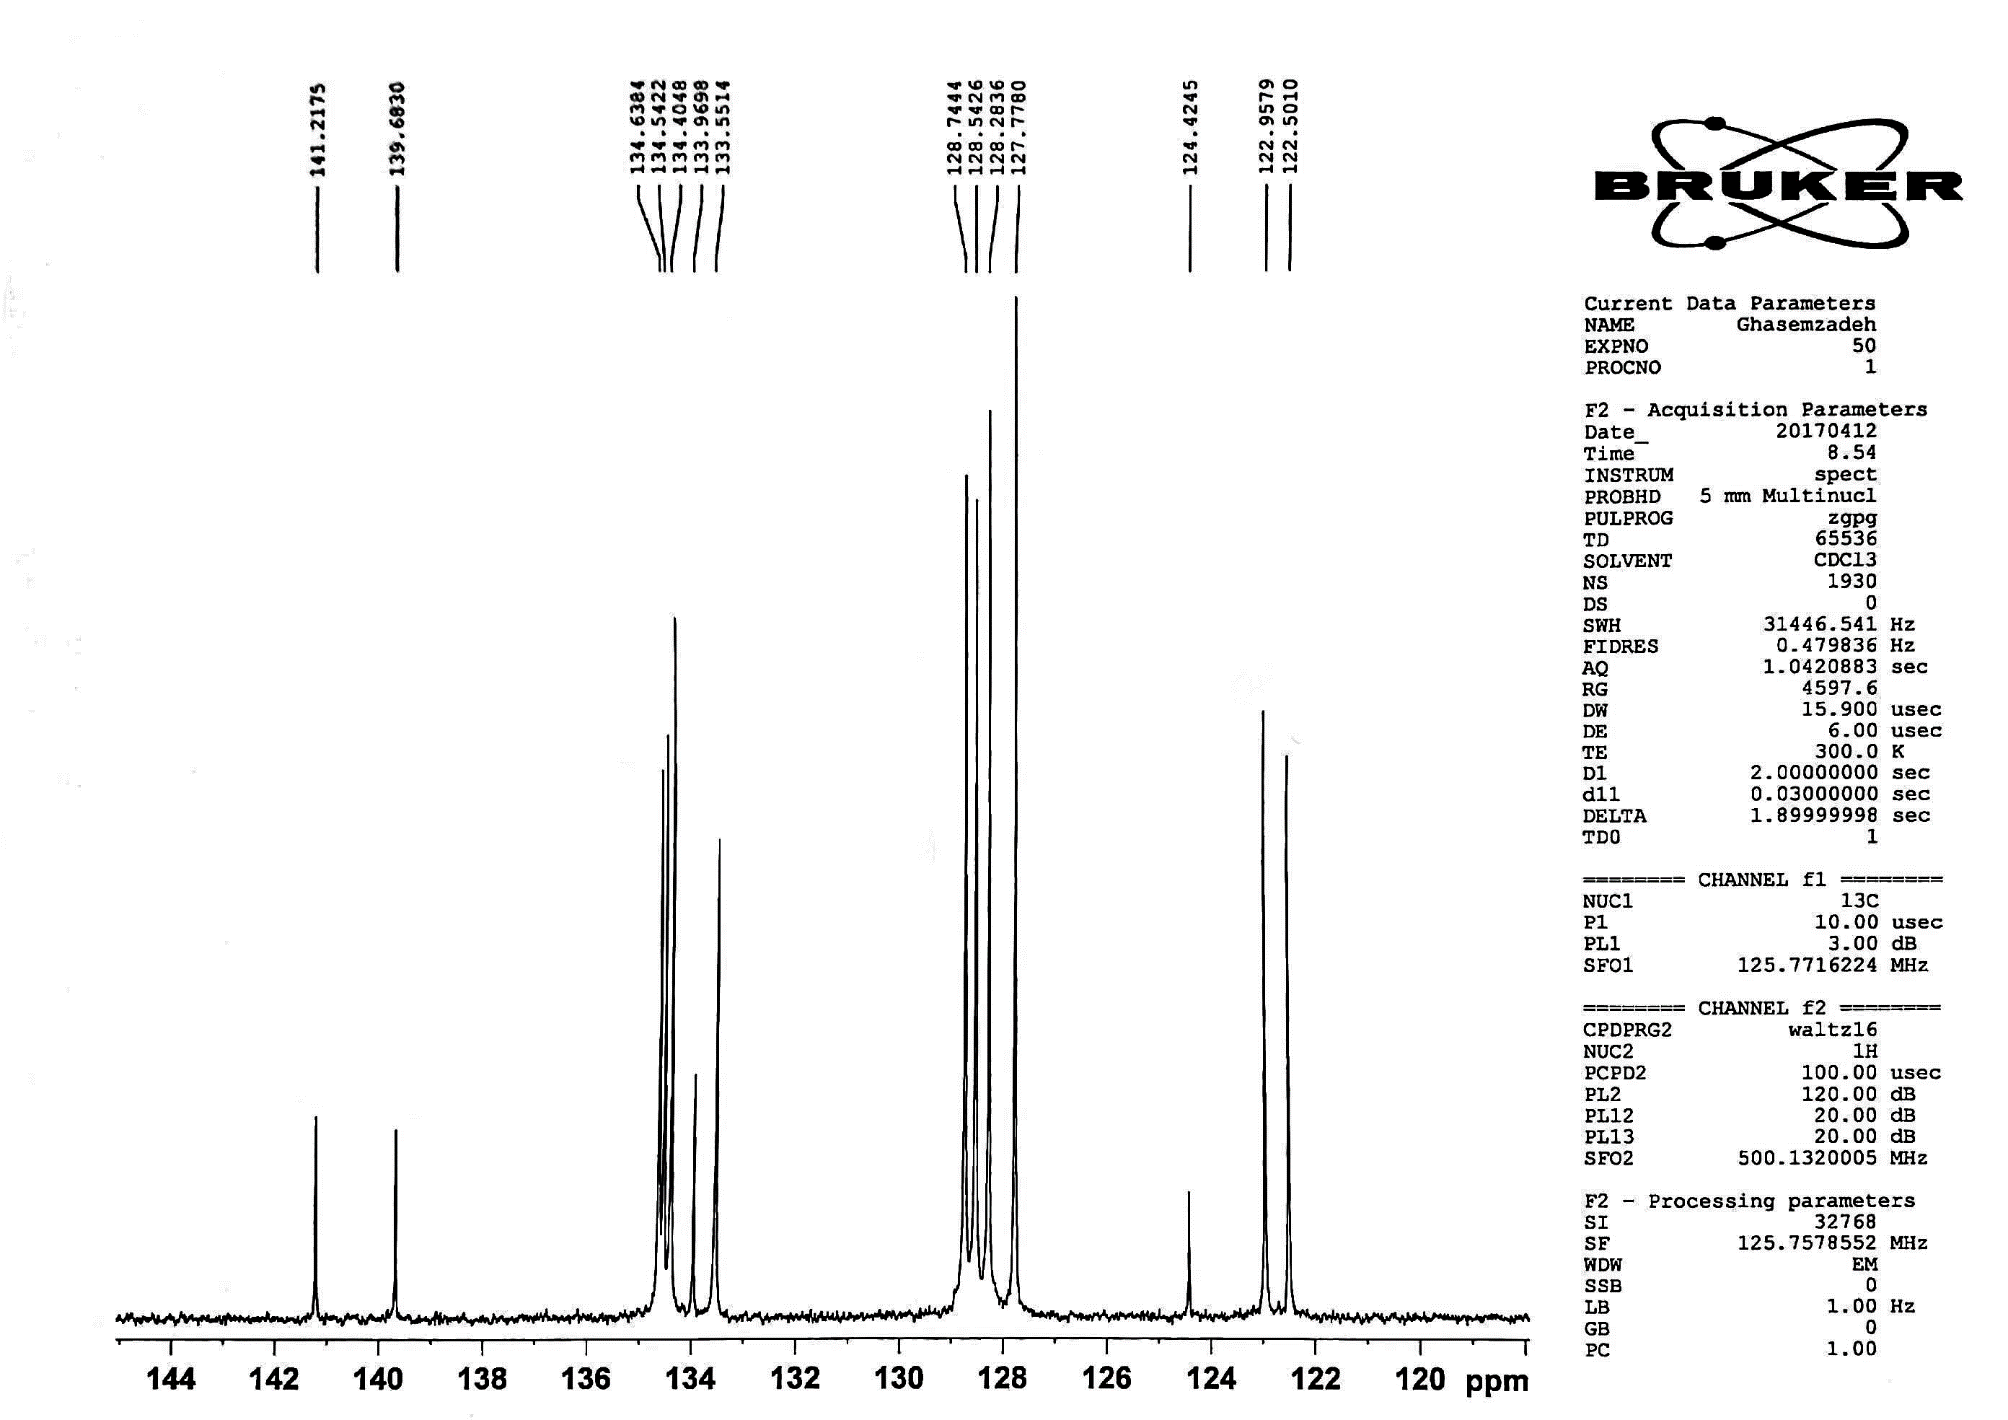
**

13C NMR of **I**
